# Supplementary material
Source: publisher figshare collection journal article supplement (https://tandf.figshare.com/articles/dataset/_/9848228)
Supplement: Supplementary file 2 [file 1]

Archive with 2 entries (2 files):
- taje_a_1653990_sm5316.xls
- taje_a_1653990_sm5312.pdf
