# Supplementary material
Source: publisher figshare collection journal article supplement (https://tandf.figshare.com/articles/dataset/_/9848228)
Supplement: Supplementary file 2 [file 1 › taje_a_1653990_sm5316.xls]

## Sheet: Table S1-Sample locations
Ferguson et al. (2020). Supplementary papers
Australian Journal of Earth Sciences, 67, doi:10.1080/08120099.2019.1653990
Table S1: Sample locations
Sample	Unit	Easting (GDA94Z53)	Northing (GDA94Z53)	Drill hole/locality	Depth (m)
RD2274-342m	Roxby Downs Granite	687244	6.62662e+06	RD2274	342
RD2274-380.6m	Roxby Downs Granite	687245	6.62662e+06	RD2274	380.6
RD2280-452.2m	Roxby Downs Granite	685917	6.62772e+06	RD2280	452.2
RD2284-352.8m	Roxby Downs Granite	686865	6.62845e+06	RD2284	352.8
RD2326-421.3m	Roxby Downs Granite	683891	6.63452e+06	RD2326	421.3
RD2336-428.8m	Roxby Downs Granite	684266	6.6352e+06	RD2336	428.8
RD2347-533.6m	Roxby Downs Granite	685002	6.63708e+06	RD2347	533.6
RD2488-517.3m	Roxby Downs Granite	677407	6.62501e+06	RD2488	517.3
RD2488-780m	Roxby Downs Granite	677407	6.62501e+06	RD2488	780
RD2495-499.3m	Roxby Downs Granite	678518	6.62645e+06	RD2495	499.3
RD2499-529.7m	Roxby Downs Granite	679120	6.62735e+06	RD2499	529.7
RD2499-681.9m	Roxby Downs Granite	679125	6.62736e+06	RD2499	681.9
RD2499-814.1m	Roxby Downs Granite	679130	6.62736e+06	RD2499	814.1
HRD001-339.6m	Horn Ridge Granite	689870	6.62848e+06	HRD001	339.6
HRD001-382m	Horn Ridge Granite	689870	6.62848e+06	HRD001	382
HRD002-438m	Horn Ridge Granite	689870	6.62848e+06	HRD002	438
HRD002-452m	Horn Ridge Granite	689870	6.62848e+06	HRD002	452
OFD1-391m	White Dam Subsuite	704405	6.6256e+06	OFD1	391
OFD1-426.2	White Dam Subsuite	704405	6.6256e+06	OFD1	426.2
OFD1-499.9m	White Dam Subsuite	704405	6.6256e+06	OFD1	499.9
OFD2-431.6	White Dam Subsuite	711084	6.61894e+06	OFD2	431.6
OFD3-450.3m	White Dam Subsuite	709094	6.61836e+06	OFD3	450.3
PD4-391m	Wirrda Subsuite	692942	6.62134e+06	PD4	391
PD4-411m	Wirrda Subsuite	692945	6.62134e+06	PD4	411
PD4-419m	Wirrda Subsuite	692946	6.62134e+06	PD4	419
PD4-452m	Wirrda Subsuite	692951	6.62133e+06	PD4	452
PD4-733m	Wirrda Subsuite	692987	6.62127e+06	PD4	733
PD4-761m	Wirrda Subsuite	692990	6.62127e+06	PD4	761
HRD010-276m	Donington Suite	689223	6.62676e+06	HRD010	276
HRD010-414m	Donington Suite	689223	6.62676e+06	HRD010	414
HRD010-441m	Donington Suite	689223	6.62676e+06	HRD010	441
SSD11-380m	Donington Suite	721330	6.60669e+06	SSD11	380
SSD11-399.7m	Donington Suite	721339	6.6067e+06	SSD11	399.7
GC11	Eucarro Rhyolite	557100	6389200	Gawler Ranges	surface
GC4	Eucarro Rhyolite	561100	6389000	Gawler Ranges	surface
PW20	Eucarro Rhyolite base	542251	6385723	Gawler Ranges	surface
884-Y10	Yardea Dacite	571349	6.3968e+06	Gawler Ranges	surface
YD20	Yardea Dacite base	530404	6423855	Gawler Ranges	surface
YD231	Pondanna Dacite base	540402	6395145	Gawler Ranges	surface

## Sheet: Table S2A-Zrc LA-ICPMS metadata
Table S2A: Zircon LA-ICPMS metadata.
Template from Horstwood et al. (2016) and www.plasmage.org
Laboratory and Sample Preparation
Laboratory name	Department of Earth Sciences, University of Tasmania
Sample type/mineral	Rock, in-situ, seaparated, zircon
Sample preparation	1-inch rock and grain mounts, 0.3 micron diamond polish. Cleaned in ethanol and DI H2O. Degassed in vacuum.
Imaging	BSE: Hitachi SU-70
Laser ablation system
Make, Model and type	Coherent COMPex Pro 110, RESOlution/Laurin Technic S155
Ablation cell and volume	Two volume laser cell with a volume 8.8 cm3 small 2nd volume fixed cup
Laser wavelength (nm)	193 nm
Pulse width (ns)	ca. 20 ns
Fluence (J cm-2)	ca. 1.9 J/cm2
Repetition rate (Hz)	5 Hz
Ablation duration (s)	30 s
Ablation pit depth / ablation rate	n.m.
Spot diameter (mm) nominal/actual	29µm
Sampling mode / pattern	Static spot ablation
Carrier gas	100% He in the cell set to 0.35 l/min, Ar carrier gas combined in 2nd volume of laser cell and was set to 1.05 l/min.
ICP-MS Instrument
Make, Model and type	Agilent 7900 quadrupole ICPMS
Sample introduction	Ablation aerosol mixed with Ar and sent into ICP-MS
RF power (W)	1350 W
Make-up gas flow (l min-1)	0
Detection system	Electron multiplier with Pb and U in pulse counting mode
Masses measured	31, 49, 56, 89, 91, 93, 139, 140, 141, 146, 147, 153, 157, 159, 163, 165, 166, 169, 172, 175, 178, 181, 202, 204, 206, 207, 208, 232, 235, 238
Integration time per peak/dwell times (ms)	56, 89, 91, 93, 140, 146, 147, 153, 157, 159, 163, 165, 166, 169, 172, 175, 178, 181 = 2 ms 31, 139, 141 = 5 ms 49, 202, 208, 232 = 10 ms 238 = 15 ms 204, 235 = 20 ms 206, 207 = 25 ms
Total integration time per output data point (s)	~253 ms
‘Sensitivity’ as useful yield (%, element)	2,200 cps / ppm on 238U in 91500 zircon using a 29 μm spot at 5Hz, 2J/cm2 and assuming ~80 ppm U in 91500.
IC Dead time (ns)	37
Data Processing
Gas blank	30 s on-peak zero subtracted
Calibration strategy	NIST610 glass and 91500 zircon as primary reference materials. Temora and Plesovice as secondary reference materials.
Reference Material info	NIST610 glass (Baker et al., 2004)
	91500 zircon (Horstwood et al., 2016)
	Temora zircon (Black et al., 2003)
	Plesovice zircon (Slama et al., 2008)
Data processing package used / Correction for LIEF	In-house macro-based Excel workbook "zircalc" and composition workbook version 9.2
Mass discrimination	Corrected using standard - sample bracketing
Common-Pb correction, composition and uncertainty	No common-Pb correction applied.
Uncertainty level and propagation	Ages are quotes at 2s absolute, propagation is by quadratic addition of components of random error from unknowns and reference material, uncertainty in drift corrections, etc. as described by Horstwood et al. (2016).
Quality control / Validation	See other sheets for validation of secondary reference materials.

## Sheet: Table S2B-Ap LA-ICPMS metadata
Table S2B: Apatite LA-ICPMS metadata.
Template from Horstwood et al. (2016) and www.plasmage.org
Laboratory and Sample Preparation
Laboratory name	Department of Earth Sciences, University of Tasmania
Sample type/mineral	Rock, in-situ, zircon
Sample preparation	1-inch grain mount, 0.3 micron diamond polish. Cleaned in ethanol and DI H2O. Degassed in vacuum.
Imaging	N/A
Laser ablation system
Make, Model and type	Coherent COMPex Pro 110, RESOlution/Laurin Technic S155
Ablation cell and volume	Two volume laser cell with a volume 8.8 cm3 small 2nd volume fixed cup
Laser wavelength (nm)	193 nm
Pulse width (ns)	ca. 20 ns
Fluence (J cm-2)	ca. 2 J/cm2
Repetition rate (Hz)	5 Hz
Ablation duration (s)	30 s
Ablation pit depth / ablation rate	n.m.
Spot diameter (mm) nominal/actual	29µm
Sampling mode / pattern	Static spot ablation
Carrier gas	100% He in the cell set to 0.35 l/min, Ar carrier gas combined in 2nd volume of laser cell and was set to 1.05 l/min.
ICP-MS Instrument
Make, Model and type	Agilent 7900 quadrupole ICPMS
Sample introduction	Ablation aerosol mixed with Ar and sent into ICP-MS
RF power (W)	1350 W
Make-up gas flow (l min-1)	0
Detection system	Electron multiplier with Pb and U in pulse counting mode
Masses measured	31, 43, 56, 89, 140, 202, 204, 206, 207, 208, 232, 238
Integration time per peak/dwell times (ms)	31, 43, 56, 89, 140 = 2 ms 202 = 8 ms 208, 232 = 10 ms 238 = 15 ms 204, 206 = 20 ms
Total integration time per output data point (s)	~180 ms
‘Sensitivity’ as useful yield (%, element)	2,200 cps / ppm on 238U in 91500 zircon using a 29 μm spot at 5Hz, 2J/cm2 and assuming ~80 ppm U in 91500.
IC Dead time (ns)	37
Data Processing
Gas blank	30 s on-peak zero subtracted
Calibration strategy	401 apatite used as primary reference material, Durango, Kovdor, McClure Mountain amd Otter Lake used as secondary reference materials.
Reference Material info	401 apatite(Thompson et al., 2016)
	Kovdor apatite (Amelin and Zaitsev, 2002)
	McClure Mountain apatite (Schoene and Bowring, 2006)
	Otter Lake apatite (Barfod et al., 2005)
Data processing package used / Correction for LIEF	In-house macro-based Excel workbook "apcalc"
Mass discrimination	Corrected using standard - sample bracketing
Common-Pb correction, composition and uncertainty	No common-Pb correction applied.
Uncertainty level and propagation	Ages are quotes at 2s absolute, propagation is by quadratic addition of components of random error from unknowns and reference material, uncertainty in drift corrections, etc. as described by Horstwood et al. (2016).
Quality control / Validation	See other sheets for validation of secondary reference materials.

## Sheet: Table S3A-Zircon geochron
Table S3A: Zircon geochronology
			207Pb/206Pb			207 cor 206Pb/238U		206Pb/238U		208Pb/232Th		207Pb/206Pb			238U/206Pb		207Pb/206Pb		common Pb		206Pb/238U		208Pb/232Th
Sample	Analysis	Comment	age	+/-2 ster	+/-1 ster	age	+/-1 ster	ratio	+/-1 RSE	ratio	+/-1 RSE	ratio	+/-1 RSE		ratio	+/-1 std err	ratio	+/-1 std err	at age of zirc		age	+/-1 ster	age	+/-1 ster
PW20-M2-Zr	AP28A0007	ok	1590.88	63.7632	31.8816	1587.04	18.8787	0.279208	0.0121178	0.0843736	0.0245762	0.0982348	0.017066		3.58156	0.0434005	0.0982348	0.00167647	0.96111		1587.37	19.2354	1637.24	40.2372
PW20-M2-Zr	AP28A0008	ok	1585.02	68.2405	34.1203	1608.73	23.3982	0.283454	0.0148287	0.0817575	0.0221906	0.097927	0.0182503		3.52792	0.0523145	0.097927	0.0017872	0.963153		1608.73	23.8554	1588.42	35.248
PW20-M2-Zr	AP28A0017	ok	1607.82	41.9868	20.9934	1599.49	16.893	0.281758	0.0108144	0.0825903	0.0200625	0.0991302	0.0112624		3.54914	0.0383819	0.0991302	0.00111644	0.962337		1600.21	17.3053	1603.97	32.1797
PW20-M2-Zr	AP28A0018	ok	1600.55	36.0726	18.0363	1590.11	17.4571	0.27993	0.0112711	0.0817527	0.0199111	0.0987448	0.00966684		3.57232	0.0402641	0.0987448	0.00095455	0.961457		1591.01	17.9325	1588.33	31.6253
PW20-M3-Zr	AP28A0030	ok	1628.21	46.3171	23.1585	1610.41	20.1564	0.284101	0.0128209	0.079593	0.0190083	0.100222	0.0124567		3.51988	0.045128	0.100222	0.00124845	0.963464		1611.98	20.6671	1547.94	29.4236
PW20-M3-Zr	AP28A0031	ok	1585.33	28.5951	14.2975	1571.04	12.2498	0.276209	0.00800183	0.0817084	0.0156411	0.0979433	0.00764781		3.62044	0.0289702	0.0979433	0.000749052	0.959668		1572.24	12.5808	1587.5	24.8303
PW20-M3-Zr	AP28A0032	ok	1669.56	40.9686	20.4843	1660.51	15.8218	0.293973	0.00971392	0.0927169	0.0224464	0.102482	0.0110769		3.40167	0.0330436	0.102482	0.00113519	0.968226		1661.35	16.1383	1792.16	40.2275
PW20-M3-Zr	AP28A0033	ok	1590.47	36.4723	18.2362	1598.96	18.5326	0.28151	0.0118948	0.0836937	0.0207462	0.0982133	0.00976114		3.55228	0.0422536	0.0982133	0.000958674	0.962217		1598.96	19.0193	1624.56	33.7036
PW20-M3-Zr	AP28A0034	ok	1585.32	40.3892	20.1946	1626.76	15.3794	0.287047	0.00963748	0.087733	0.0183547	0.0979427	0.0108021		3.48375	0.0335746	0.0979427	0.00105799	0.964884		1626.76	15.6778	1699.76	31.1986
PW20-M3-Zr	AP28A0035	ok	1587.81	31.7972	15.8986	1589.56	14.9972	0.279642	0.00968383	0.0838106	0.0177322	0.0980734	0.00850698		3.57601	0.0346294	0.0980734	0.000834308	0.961318		1589.56	15.393	1626.74	28.8457
PW20-M3-Zr	AP28A0038	ok	1588.36	42.0308	21.0154	1616.17	17.4948	0.284934	0.0110638	0.083395	0.022985	0.098102	0.0112457		3.50958	0.0388295	0.098102	0.00110322	0.963866		1616.17	17.881	1618.99	37.2125
PW20-M3-Zr	AP28A0040	ok	1603.88	49.9661	24.9831	1621.73	18.1706	0.286044	0.0114299	0.0830057	0.0192758	0.0989211	0.0133959		3.49596	0.0399585	0.0989211	0.00132513	0.964401		1621.73	18.5362	1611.73	31.0673
PW20-M3-Zr	AP28A0041	ok	1582.52	35.264	17.632	1610.53	14.0634	0.283811	0.00892246	0.0859555	0.0179958	0.0977962	0.00942795		3.52347	0.031438	0.0977962	0.000922017	0.963325		1610.53	14.3699	1666.71	29.9936
PW20-M3-Zr	AP28A0042	ok	1641.36	24.646	12.323	1634.58	13.264	0.288733	0.00832077	0.088521	0.0172183	0.100934	0.00663966		3.46341	0.0288182	0.100934	0.00067017	0.965697		1635.2	13.6061	1714.4	29.5191
PW20-M3-Zr	AP28A0043	ok	1585.88	55.922	27.961	1597.67	24.8252	0.281254	0.0159231	0.0857318	0.0201338	0.0979723	0.0149575		3.55551	0.0566148	0.0979723	0.00146542	0.962094		1597.67	25.44	1662.54	33.4733
PW20-M3-Zr	AP28A0044	ok	1604.77	27.6229	13.8114	1608.25	13.3853	0.283358	0.0085362	0.088058	0.0161294	0.0989684	0.00740651		3.52911	0.0301251	0.0989684	0.000733011	0.963107		1608.25	13.7283	1705.8	27.5135
PW20-M3-Zr	AP28A0045	ok	1586.52	20.2386	10.1193	1582.13	12.0417	0.278243	0.00782951	0.0811956	0.015466	0.0980054	0.00541369		3.59398	0.0281391	0.0980054	0.000530571	0.960645		1582.51	12.3902	1577.92	24.4041
PW20-M3-Zr	AP28A0047	ok	1612.51	37.8352	18.9176	1638.05	14.7689	0.289305	0.00919566	0.089328	0.0183892	0.0993802	0.0101549		3.45656	0.0317854	0.0993802	0.0010092	0.965973		1638.05	15.063	1729.38	31.8019
PW20-M2-Zr	AP28A0049	ok	1588.22	29.9669	14.9835	1595	13.517	0.280723	0.00868947	0.0835156	0.0168896	0.0980949	0.00801773		3.56223	0.0309539	0.0980949	0.000786499	0.961839		1595	13.8597	1621.24	27.3821
PW20-M2-Zr	AP28A0052	ok	1627.43	49.2799	24.64	1618.19	21.2226	0.285503	0.0134276	0.0905496	0.0223463	0.10018	0.0132522		3.5026	0.0470315	0.10018	0.00132761	0.96414		1619.01	21.7395	1752.03	39.1515
PW20-M2-Zr	AP28A0053	ok	1588.23	56.2886	28.1443	1614.41	20.2227	0.284584	0.0127763	0.0853488	0.0234202	0.0980952	0.0150602		3.5139	0.0448946	0.0980952	0.00147733	0.963697		1614.41	20.6261	1655.41	38.77
PW20-M2-Zr	AP28A0054	ok	1585.33	38.5499	19.2749	1601.24	17.4822	0.281962	0.0111864	0.0855473	0.0218025	0.0979434	0.0103102		3.54657	0.0396735	0.0979434	0.00100982	0.962435		1601.24	17.9122	1659.11	36.1726
PW20-M2-Zr	AP28A0061	ok	1584.77	31.1814	15.5907	1623.51	14.7225	0.286399	0.00927317	0.0875969	0.0183139	0.0979138	0.00833891		3.49164	0.0323785	0.0979138	0.000816495	0.964572		1623.51	15.0551	1697.23	31.083
PW20-M2-Zr	AP28A0009	rejected	2103.32	148.649	74.3245	1689.22	26.9482	0.309084	0.0150376	0.135523	0.0565859	0.130397	0.0423369		3.23536	0.0486521	0.130397	0.00552059	0.975539		1736.2	26.1082	2568.84	145.36
PW20-M2-Zr	AP28A0010	rejected	2031.97	40.9862	20.4931	1632.14	21.5131	0.296583	0.0134686	0.10044	0.0171725	0.125225	0.011579		3.37174	0.0454125	0.125225	0.00144998	0.969487		1674.34	22.551	1934.52	33.2205
PW20-M2-Zr	AP28A0011	rejected	1739.28	31.6818	15.8409	1583.64	14.4858	0.28126	0.0093774	0.0866376	0.0171473	0.106437	0.00864174		3.55542	0.0333406	0.106437	0.000919803	0.962097		1597.71	14.9823	1679.4	28.7972
PW20-M2-Zr	AP28A0012	rejected	1765.15	42.4495	21.2248	1615.14	19.0172	0.287532	0.0120477	0.0919787	0.0189834	0.107953	0.0116162		3.47788	0.0419005	0.107953	0.001254	0.965118		1629.18	19.6279	1778.5	33.762
PW20-M2-Zr	AP28A0013	rejected	2274.08	37.3452	18.6726	1598.34	17.4781	0.296797	0.0111095	0.145785	0.0193522	0.143851	0.0108373		3.36931	0.0374313	0.143851	0.00155896	0.969591		1675.41	18.6129	2750.69	53.2318
PW20-M2-Zr	AP28A0014	rejected	1696.29	35.1562	17.5781	1590.45	13.772	0.281698	0.00885806	0.0922734	0.0217019	0.103977	0.00953772		3.5499	0.0314452	0.103977	0.000991702	0.962308		1599.91	14.1721	1783.96	38.7152
PW20-M2-Zr	AP28A0015	rejected	4229.92	142.399	71.1995	2470.97	290.848	0.706246	0.107374	1.20623	0.0957667	0.496186	0.0482716		1.41594	0.152035	0.496186	0.0239517	1.15011		3444.29	369.827	15993.7	1531.66
PW20-M2-Zr	AP28A0016	rejected	1667.1	60.4972	30.2486	1637.06	17.5816	0.289657	0.0108883	0.0834178	0.0336825	0.102346	0.0163518		3.45235	0.0375903	0.102346	0.00167354	0.966143		1639.82	17.8549	1619.42	54.546
PW20-M2-Zr	AP28A0019	rejected	1660.68	28.0973	14.0486	1616.15	13.2818	0.285729	0.00842222	0.0905462	0.0160568	0.101991	0.00758819		3.49982	0.0294762	0.101991	0.000773931	0.964249		1620.15	13.6453	1751.97	28.131
PW20-M2-Zr	AP28A0020	rejected	1685.73	49.2414	24.6207	1658.37	17.1578	0.29389	0.0105244	0.0977749	0.0178181	0.103383	0.0133411		3.40263	0.0358105	0.103383	0.00137924	0.968186		1660.94	17.4803	1885.5	33.5961
PW20-M3-Zr	AP28A0036	rejected	1636.45	68.9571	34.4786	1607.97	19.8125	0.283805	0.0125164	0.0808982	0.0254319	0.100668	0.0185654		3.52355	0.0441022	0.100668	0.00186893	0.963322		1610.5	20.1576	1572.36	39.988
PW20-M3-Zr	AP28A0037	rejected	1897.26	48.4955	24.2478	1667.45	20.7641	0.299944	0.0126769	0.0944763	0.0175471	0.116116	0.013486		3.33395	0.042264	0.116116	0.00156593	0.971113		1691.03	21.437	1824.68	32.0179
PW20-M3-Zr	AP28A0039	rejected	1683.53	55.0287	27.5144	1616.06	16.2368	0.286135	0.0101996	0.090901	0.0189671	0.10326	0.0149049		3.49486	0.0356463	0.10326	0.00153909	0.964444		1622.19	16.5457	1758.54	33.3544
PW20-M3-Zr	AP28A0046	rejected	1738.61	29.9189	14.9594	1615.35	15.6017	0.287049	0.00990343	0.0937603	0.0183475	0.106399	0.00816019		3.48372	0.0345008	0.106399	0.000868232	0.964885		1626.77	16.1106	1811.45	33.2356
PW20-M2-Zr	AP28A0048	rejected	1643.73	28.8492	14.4246	1511.71	23.807	0.266413	0.0162609	0.0928583	0.0173868	0.101063	0.00777437		3.75357	0.0610363	0.101063	0.000785702	0.954968		1522.57	24.7583	1794.78	31.2054
PW20-M2-Zr	AP28A0050	rejected	1706.96	37.2874	18.6437	1558.9	14.5726	0.276133	0.00957417	0.0969379	0.0186592	0.104581	0.0101295		3.62144	0.0346723	0.104581	0.00105936	0.959632		1571.86	15.0493	1870.09	34.8943
PW20-M2-Zr	AP28A0051	rejected	1810.2	37.4735	18.7367	1571.97	14.1409	0.280506	0.00918851	0.0967202	0.0177264	0.110655	0.0103116		3.56499	0.0327569	0.110655	0.00114104	0.961734		1593.91	14.6456	1866.08	33.0788
PW20-M2-Zr	AP28A0055	rejected	1711.58	54.7822	27.3911	1613.55	36.711	0.286202	0.0233817	0.081245	0.0229895	0.104844	0.0148909		3.49403	0.0816964	0.104844	0.00156122	0.964477		1622.52	37.9374	1578.84	36.2968
PW20-M2-Zr	AP28A0056	rejected	1816.59	40.2843	20.1422	1581.24	15.7546	0.282338	0.0101797	0.0932285	0.0220866	0.111045	0.0110938		3.54185	0.036055	0.111045	0.00123191	0.962616		1603.13	16.3194	1801.62	39.7918
PW20-M2-Zr	AP28A0057	rejected	1704.25	79.7347	39.8673	1598.94	36.6703	0.283396	0.0235061	0.0823263	0.0436618	0.104427	0.0216534		3.52863	0.0829442	0.104427	0.00226121	0.963125		1608.44	37.8082	1599.04	69.8172
PW20-M2-Zr	AP28A0058	rejected	2018.51	28.4181	14.209	1690.64	17.493	0.307137	0.0105657	0.121942	0.0195609	0.124276	0.00801599		3.25588	0.0344007	0.124276	0.000996199	0.974595		1726.6	18.2428	2325.64	45.4915
PW20-M2-Zr	AP28A0059	rejected	1817.89	40.8401	20.4201	1671.96	25.5372	0.299036	0.0156392	0.0990329	0.0220968	0.111124	0.0112486		3.34408	0.0522988	0.111124	0.00125	0.970673		1686.53	26.3759	1908.65	42.1751
PW20-M2-Zr	AP28A0060	rejected	1776.82	66.647	33.3235	1516.15	19.8161	0.269608	0.0133114	0.0922492	0.0302896	0.108645	0.0182642		3.70909	0.0493733	0.108645	0.00198432	0.9565		1538.81	20.4838	1783.51	54.0218
RD2488-780.5m (OD1076-M4-Zr)	AP28A0068	ok	1588.18	29.6227	14.8114	1590.27	12.0492	0.279783	0.00776298	0.0813877	0.0138566	0.0980925	0.00792559		3.5742	0.0277464	0.0980925	0.000777441	0.961386		1590.27	12.3452	1581.51	21.9143
RD2488-780.5m (OD1076-M4-Zr)	AP28A0070	ok	1603.58	20.6483	10.3242	1573.24	11.3599	0.276918	0.00742607	0.0865606	0.0123143	0.0989055	0.00553558		3.61118	0.0268169	0.0989055	0.000547499	0.960009		1575.82	11.7022	1677.97	20.663
RD2488-780.5m (OD1076-M4-Zr)	AP28A0073	ok	1604.89	20.9675	10.4837	1623.95	11.079	0.286487	0.00699102	0.085153	0.0131435	0.0989748	0.00562209		3.49056	0.0244026	0.0989748	0.000556446	0.964614		1623.95	11.3531	1651.76	21.7099
RD2488-780.5m (OD1076-M4-Zr)	AP28A0100	ok	1581.39	21.3742	10.6871	1612.59	11.0834	0.284221	0.00704127	0.0843933	0.0128502	0.097737	0.00571363		3.51839	0.0247739	0.097737	0.000558433	0.963523		1612.59	11.3547	1637.61	21.0436
RD2488-780.5m (OD1076-M4-Zr)	AP28A0102	ok	1608.34	34.125	17.0625	1623.79	14.9719	0.286454	0.00943235	0.0881556	0.0141192	0.0991578	0.00915415		3.49096	0.0329279	0.0991578	0.000907706	0.964598		1623.79	15.3161	1707.61	24.1101
RD2326-421.3m-Zr	DE04A0035	ok	1596.09	21.156	10.578	1579.9	17.024	0.278	0.0110441	0.0788545	0.0194847	0.098509	0.0113323		3.59712	0.0397268	0.098509	0.00111633	0.960529		1581.28	17.4638	1534.1	29.8915
RD2274-342m-Zr	DE04A0046	ok	1583.9	23.793	11.8965	1564.84	17.5386	0.275061	0.0114813	0.0778798	0.0226625	0.0978685	0.0127246		3.63556	0.041741	0.0978685	0.00124534	0.959116		1566.44	17.9848	1515.84	34.3526
RD2274-380.6m-Zr	DE04A0050	ok	1569.97	20.6765	10.3383	1585.27	16.9367	0.278791	0.0109427	0.0804024	0.0191834	0.0971428	0.0110378		3.58691	0.0392505	0.0971428	0.00107224	0.960909		1585.27	17.3471	1563.08	29.9852
RD2347-533.6m-Zr	OC31A0008	ok	1590.25	17.601	8.80049	1579.47	19.9123	0.277823	0.0129657	0.0764278	0.0195645	0.0982016	0.00942088		3.59941	0.0466688	0.0982016	0.000925145	0.960444		1580.39	20.4908	1488.59	29.1236
RD2336-428m-Zr	OC31A0038	ok	1596.49	21.6398	10.8199	1581.99	20.0035	0.278385	0.0129803	0.0759119	0.0208958	0.0985302	0.0115921		3.59214	0.0466271	0.0985302	0.00114217	0.960714		1583.23	20.5507	1478.9	30.9028
RD2488-517.3m-Zr	OC31A0041	ok	1596.31	16.5172	8.25859	1596.13	19.4952	0.28095	0.0125565	0.0797713	0.0190908	0.0985204	0.00884775		3.55935	0.0446932	0.0985204	0.000871683	0.961948		1596.14	20.042	1551.27	29.6151
RD2488-517.3m-Zr	OC31A0043	ok	1576.87	16.7411	8.37057	1590.78	17.9711	0.279884	0.0115998	0.0785224	0.0198223	0.0975012	0.00894499		3.5729	0.0414451	0.0975012	0.000872147	0.961435		1590.78	18.4528	1527.88	30.2861
RD2280-452.2m-Zr	OC31A0084	ok	1589.21	15.5393	7.76964	1603.44	19.6512	0.282401	0.0125902	0.0818777	0.0196923	0.0981469	0.00831623		3.54107	0.0445828	0.0981469	0.000816213	0.962646		1603.44	20.1877	1590.66	31.3238
RD2280-452.2m-Zr	OC31A0086	ok	1587.63	21.0212	10.5106	1591.32	20.1377	0.279991	0.0129882	0.0814234	0.0183438	0.098064	0.0112477		3.57154	0.0463879	0.098064	0.00110299	0.961486		1591.32	20.6684	1582.18	29.0231
RD2495-499.3m-Zr	OC31A0089	ok	1600.06	13.1003	6.55013	1602.38	19.4586	0.28219	0.012494	0.0792916	0.018082	0.0987187	0.00702084		3.54371	0.0442751	0.0987187	0.000693088	0.962544		1602.38	20.0201	1542.29	27.8877
RD2495-499.3m-Zr	OC31A0090	ok	1586.76	15.7409	7.87043	1593.45	20.6777	0.280414	0.0133453	0.0808904	0.0194833	0.098018	0.00842141		3.56615	0.0475913	0.098018	0.00082545	0.96169		1593.45	21.265	1572.21	30.6319
RD2495-499.3m-Zr	OC31A0091	ok	1607.74	21.4236	10.7118	1591.03	22.6013	0.280221	0.0145941	0.0844141	0.018846	0.0991261	0.011493		3.56861	0.0520806	0.0991261	0.00113926	0.961597		1592.48	23.2408	1638	30.8697
RD2495-499.3m-Zr	OC31A0092	ok	1580.17	21.423	10.7115	1566.16	24.2718	0.275238	0.0159476	0.0805931	0.0205912	0.0976736	0.0114515		3.63322	0.0579412	0.0976736	0.00111851	0.959201		1567.33	24.9952	1566.65	32.2591
RD2488-780.5m (OD1076-M4-Zr)	AP28A0021	rejected	3958.85	97.9558	48.9779	6427.34	409.02	1.71025	0.176222	0.455179	0.104844	0.413485	0.0326766		0.58471	0.103039	0.413485	0.0135113	-11.7037		6427.34	1132.64	7582.19	794.948
RD2488-780.5m (OD1076-M4-Zr)	AP28A0022	rejected	2082.31	30.985	15.4925	839.508	13.0951	0.150224	0.0160346	0.0821247	0.0203327	0.128848	0.00880398		6.65672	0.106738	0.128848	0.00113437	0.900673		902.22	14.4667	1595.28	32.4364
RD2488-780.5m (OD1076-M4-Zr)	AP28A0023	rejected	2954.02	29.0992	14.5496	771.319	16.3047	0.155149	0.0214821	0.222439	0.0342681	0.21639	0.00901563		6.44542	0.138461	0.21639	0.00195089	0.902912		929.762	19.9733	4059.59	139.115
RD2488-780.5m (OD1076-M4-Zr)	AP28A0024	rejected	2286.93	33.0577	16.5288	632.584	10.2636	0.114828	0.0165182	0.091484	0.0366772	0.144928	0.00960623		8.70865	0.143852	0.144928	0.00139221	0.884774		700.728	11.5748	1769.34	64.8945
RD2488-780.5m (OD1076-M4-Zr)	AP28A0025	rejected	1597.6	25.6694	12.8347	1548.68	18.9204	0.272356	0.0125961	0.086801	0.0140674	0.0985886	0.00687631		3.67166	0.0462484	0.0985886	0.000677926	0.957818		1552.75	19.5585	1682.44	23.6674
RD2488-780.5m (OD1076-M4-Zr)	AP28A0026	rejected	1716.63	36.0624	18.0312	560.16	6.63094	0.0962329	0.0120444	0.0708056	0.0188133	0.105133	0.00980871		10.3915	0.125159	0.105133	0.00103122	0.876557		592.294	7.13382	1382.74	26.014
RD2488-780.5m (OD1076-M4-Zr)	AP28A0065	rejected	1747.27	46.3109	23.1554	1525.95	18.7293	0.27085	0.0125887	0.107897	0.0164385	0.106903	0.0126447		3.69208	0.0464787	0.106903	0.00135175	0.957095		1545.11	19.451	2071.01	34.0444
RD2488-780.5m (OD1076-M4-Zr)	AP28A0066	rejected	1944.2	36.3534	18.1767	1239.28	12.8755	0.221712	0.0106733	0.139818	0.0169116	0.119196	0.0101659		4.51036	0.0481404	0.119196	0.00121173	0.933738		1290.91	13.7783	2645.15	44.7336
RD2488-780.5m (OD1076-M4-Zr)	AP28A0067	rejected	1925.03	28.4134	14.2067	1128.01	10.3892	0.200873	0.0094743	0.128704	0.0179758	0.117926	0.00792753		4.97828	0.0471657	0.117926	0.00093486	0.923977		1180.01	11.1797	2447.09	43.9885
RD2488-780.5m (OD1076-M4-Zr)	AP28A0069	rejected	1738.55	24.1354	12.0677	1581.29	12.6827	0.280816	0.00823614	0.0991917	0.0138378	0.106395	0.00658272		3.56105	0.0293293	0.106395	0.000700369	0.961883		1595.47	13.1405	1911.57	26.452
RD2488-780.5m (OD1076-M4-Zr)	AP28A0069	rejected	1738.55	24.1354	12.0677	1581.29	12.6827	0.280816	0.00823614	0.0991917	0.0138378	0.106395	0.00658272		3.56105	0.0293293	0.106395	0.000700369	0.961883		1595.47	13.1405	1911.57	26.452
RD2488-780.5m (OD1076-M4-Zr)	AP28A0071	rejected	890.377	25.4422	12.7211	461.975	5.52882	0.0754547	0.0122158	0.0485208	0.0156127	0.068721	0.00615878		13.253	0.161896	0.068721	0.000423237	0.86749		468.935	5.72843	957.664	14.9517
RD2488-780.5m (OD1076-M4-Zr)	AP28A0072	rejected	1581.07	25.4467	12.7234	886.905	16.6493	0.152835	0.0194076	0.0900049	0.0182457	0.0977203	0.00680198		6.543	0.126984	0.0977203	0.000664692	0.901859		916.836	17.7936	1741.93	31.7828
RD2488-780.5m (OD1076-M4-Zr)	AP28A0073	rejected	1604.89	20.9675	10.4837	1623.95	11.079	0.286487	0.00699102	0.085153	0.0131435	0.0989748	0.00562209		3.49056	0.0244026	0.0989748	0.000556446	0.964614		1623.95	11.3531	1651.76	21.7099
RD2488-780.5m (OD1076-M4-Zr)	AP28A0074	rejected	1614.62	21.1622	10.5811	1657.3	12.093	0.29316	0.00745907	0.0871017	0.0129344	0.0994931	0.00568148		3.4111	0.0254437	0.0994931	0.000565268	0.967834		1657.3	12.3619	1688.03	21.8336
RD2488-780.5m (OD1076-M4-Zr)	AP28A0075	rejected	1477.03	43.5389	21.7694	896.325	14.2356	0.153511	0.0163852	0.102325	0.0204179	0.0924689	0.0114786		6.51417	0.106736	0.0924689	0.00106141	0.902167		920.617	15.0845	1969.11	40.2051
RD2488-780.5m (OD1076-M4-Zr)	AP28A0076	rejected	1486.67	24.3601	12.1801	806.166	7.00233	0.137688	0.00893392	0.0477792	0.0136151	0.0929401	0.00643061		7.2628	0.0648852	0.0929401	0.000597662	0.895004		831.575	7.42923	943.363	12.8439
RD2488-780.5m (OD1076-M4-Zr)	AP28A0077	rejected	1556.38	27.865	13.9325	1112.19	9.28599	0.192829	0.00861927	0.0610845	0.014413	0.0964413	0.00742431		5.18594	0.044699	0.0964413	0.00071601	0.920236		1136.68	9.79738	1198.41	17.2727
RD2488-780.5m (OD1076-M4-Zr)	AP28A0078	rejected	2025.34	29.8931	14.9465	667.766	6.93604	0.118163	0.010554	0.0919417	0.0167775	0.124756	0.00843868		8.46286	0.0893169	0.124756	0.00105278	0.886257		719.984	7.5987	1777.82	29.8273
RD2488-780.5m (OD1076-M4-Zr)	AP28A0079	rejected	1258.46	25.8495	12.9247	541.233	6.21269	0.0902666	0.0117381	0.0378373	0.014034	0.0825442	0.00661161		11.0783	0.130038	0.0825442	0.00054575	0.873941		557.113	6.53944	750.663	10.5348
RD2488-780.5m (OD1076-M4-Zr)	AP28A0080	rejected	1926.37	28.223	14.1115	749.217	7.29322	0.131806	0.00993599	0.085619	0.0190939	0.118014	0.00787566		7.58691	0.0753835	0.118014	0.000929442	0.892358		798.16	7.93051	1660.44	31.7042
RD2488-780.5m (OD1076-M4-Zr)	AP28A0081	rejected	1772.71	40.0623	20.0311	714.49	23.0366	0.124001	0.0331896	0.0669902	0.0196644	0.108401	0.0109732		8.06443	0.267655	0.108401	0.0011895	0.888862		753.553	25.0101	1310.6	25.7722
RD2488-780.5m (OD1076-M4-Zr)	AP28A0082	rejected	1390.58	39.4889	19.7444	529.911	5.84651	0.08899	0.0112333	0.038801	0.0153472	0.0883719	0.010289		11.2372	0.126231	0.0883719	0.000909259	0.873382		549.561	6.1734	769.423	11.8085
RD2488-780.5m (OD1076-M4-Zr)	AP28A0083	rejected	4158.35	18.7657	9.38286	6987.15	454.541	1.95613	0.0962186	5.98732	0.0636604	0.472732	0.00633532		0.511213	0.0491882	0.472732	0.00299491	151.954		6987.15	672.294	39294.5	2501.51
RD2488-780.5m (OD1076-M4-Zr)	AP28A0084	rejected	1460.93	37.3548	18.6774	922.26	9.06026	0.15795	0.010109	0.0554326	0.0149388	0.0916878	0.00982685		6.33111	0.064001	0.0916878	0.000901002	0.904187		945.375	9.55676	1090.46	16.2903
RD2488-780.5m (OD1076-M4-Zr)	AP28A0085	rejected	1789.06	40.2351	20.1176	628.288	6.6221	0.108821	0.010694	0.0675736	0.0207614	0.109377	0.0110428		9.18942	0.0982717	0.109377	0.00120783	0.882109		665.896	7.12109	1321.65	27.4393
RD2488-780.5m (OD1076-M4-Zr)	AP28A0086	rejected	1287.15	19.891	9.94551	549.336	8.82718	0.0917915	0.0164598	0.0376721	0.0153475	0.083767	0.00510838		10.8942	0.179317	0.083767	0.000427914	0.874608		566.124	9.31828	747.444	11.4714
RD2488-780.5m (OD1076-M4-Zr)	AP28A0087	rejected	1641.27	34.3363	17.1682	600.937	7.48565	0.102849	0.0127209	0.0553485	0.0186149	0.100929	0.00925012		9.72298	0.123685	0.100929	0.000933607	0.879469		631.084	8.02794	1088.85	20.2689
RD2488-780.5m (OD1076-M4-Zr)	AP28A0088	rejected	1724.91	32.0247	16.0123	664.083	5.84035	0.114623	0.00894727	0.0619248	0.0154095	0.105607	0.00871955		8.72425	0.0780582	0.105607	0.000920845	0.884682		699.54	6.25898	1214.41	18.7135
RD2488-780.5m (OD1076-M4-Zr)	AP28A0089	rejected	1888.11	35.9902	17.9951	485.905	7.04823	0.0843667	0.0147263	0.053448	0.0179189	0.115527	0.00999745		11.853	0.174551	0.115527	0.00115497	0.871364		522.135	7.68913	1052.42	18.8582
RD2488-780.5m (OD1076-M4-Zr)	AP28A0090	rejected	1674.55	24.1771	12.0885	578.8	6.79048	0.0992055	0.0119893	0.0956163	0.0158238	0.102759	0.00654104		10.0801	0.120853	0.102759	0.000672154	0.877864		609.751	7.31048	1845.72	29.2064
RD2488-780.5m (OD1076-M4-Zr)	AP28A0091	rejected	1999.6	24.7775	12.3888	748.512	8.8621	0.13252	0.0121293	0.097653	0.0148467	0.122959	0.0069738		7.54602	0.0915283	0.122959	0.000857489	0.892679		802.227	9.73049	1883.26	27.9602
RD2488-780.5m (OD1076-M4-Zr)	AP28A0092	rejected	2013.05	48.662	24.331	1070.42	35.5699	0.191712	0.0344179	0.108677	0.0235993	0.123894	0.0137176		5.21615	0.179529	0.123894	0.00169953	0.919717		1130.64	38.9144	2085.24	49.2103
RD2488-780.5m (OD1076-M4-Zr)	AP28A0093	rejected	2765.36	28.0567	14.0283	716.999	9.14278	0.139306	0.0127456	0.167018	0.0191392	0.192702	0.00854798		7.17842	0.0914934	0.192702	0.00164721	0.895734		840.74	10.7157	3121.81	59.7488
RD2488-780.5m (OD1076-M4-Zr)	AP28A0094	rejected	1839.64	43.0631	21.5316	516.14	10.1621	0.0893636	0.0200643	0.0420274	0.0167863	0.112466	0.0118924		11.1902	0.224524	0.112466	0.00133749	0.873546		551.773	11.0709	832.101	13.9679
RD2488-780.5m (OD1076-M4-Zr)	AP28A0095	rejected	2752.83	28.2691	14.1346	827.136	21.8868	0.160784	0.0271846	0.328001	0.0298384	0.191238	0.00860282		6.21953	0.169075	0.191238	0.00164518	0.90548		961.131	26.1279	5733.7	171.084
RD2488-780.5m (OD1076-M4-Zr)	AP28A0096	rejected	1336.43	28.4608	14.2304	659.246	8.31769	0.110967	0.0129527	0.041918	0.0133609	0.0859222	0.00736009		9.0117	0.116726	0.0859222	0.000632395	0.883059		678.361	8.78662	829.98	11.0893
RD2488-780.5m (OD1076-M4-Zr)	AP28A0101	rejected	1569.82	29.9187	14.9593	1232.34	10.105	0.214626	0.0084606	0.0666415	0.0156303	0.097135	0.00798557		4.65927	0.0394203	0.097135	0.000775678	0.930409		1253.41	10.6046	1303.99	20.3817
RD2488-780.5m (OD1076-M4-Zr)	AP28A0103	rejected	1555.29	22.6902	11.3451	997.544	11.5014	0.172286	0.0119292	0.0633432	0.0153564	0.0963851	0.00604466		5.80431	0.0692406	0.0963851	0.000582615	0.910748		1024.69	12.2237	1241.39	19.0633
RD2488-780.5m (OD1076-M4-Zr)	AP28A0104	rejected	1668.59	23.2858	11.6429	1659.27	12.4099	0.29373	0.00765828	0.0963821	0.0148266	0.102429	0.00629513		3.40449	0.0260725	0.102429	0.000644802	0.968109		1660.14	12.7138	1859.84	27.5751
RD2488-780.5m (OD1076-M4-Zr)	AP28A0105	rejected	1566.61	50.016	25.008	1521.91	19.6094	0.266991	0.0132353	0.0831927	0.0176498	0.0969688	0.0133441		3.74544	0.049572	0.0969688	0.00129396	0.955246		1525.51	20.1906	1615.22	28.5083
RD2488-780.5m (OD1076-M4-Zr)	AP28A0106	rejected	1705.94	42.8429	21.4215	1596.45	17.8868	0.282974	0.011469	0.0912301	0.0148066	0.104523	0.0116373		3.5339	0.0405302	0.104523	0.00121636	0.962922		1606.32	18.4229	1764.64	26.1284
RD2488-780.5m (OD1076-M4-Zr)	AP28A0107	rejected	2838.48	41.2252	20.6126	1941.1	32.6488	0.387068	0.0167214	0.287304	0.0278763	0.201512	0.0126435		2.58352	0.0432001	0.201512	0.00254781	1.01355		2109.22	35.269	5104.6	142.297
RD2488-780.5m (OD1076-M4-Zr)	AP28A0108	rejected	1700.79	43.1465	21.5732	1616.27	16.2983	0.286496	0.0102956	0.0949922	0.0156387	0.104231	0.0117121		3.49045	0.0359364	0.104231	0.00122077	0.964619		1624	16.7201	1834.2	28.6846
RD2488-780.5m (OD1076-M4-Zr)	AP28A0109	rejected	1607.32	26.3963	13.1982	530.137	18.622	0.0902595	0.0359694	0.0833617	0.0157878	0.0991039	0.00707999		11.0792	0.398511	0.0991039	0.000701655	0.873938		557.072	20.0375	1618.37	25.5506
RD2488-780.5m (OD1076-M4-Zr)	AP28A0110	rejected	1707.22	24.1205	12.0603	921.557	25.2017	0.160364	0.0283066	0.0928614	0.0133242	0.104596	0.00655283		6.23581	0.176515	0.104596	0.0006854	0.905289		958.8	27.1404	1794.83	23.9147
RD2488-780.5m (OD1076-M4-Zr)	AP28A0111	rejected	1560.72	25.7266	12.8633	1215.91	15.9572	0.211544	0.0136024	0.0892424	0.0134625	0.0966646	0.00685849		4.72716	0.0643009	0.0966646	0.000662973	0.928964		1237.04	16.8267	1727.79	23.2603
RD2488-780.5m (OD1076-M4-Zr)	AP28A0112	rejected	1759.93	37.9348	18.9674	1201.29	10.1733	0.211694	0.00868003	0.0952053	0.0145463	0.107645	0.010374		4.72379	0.0410026	0.107645	0.00111671	0.929034		1237.84	10.7445	1838.14	26.7381
RD2488-780.5m (OD1076-M4-Zr)	AP28A0113	rejected	1632.63	40.6499	20.3249	1405.87	13.353	0.246974	0.00975878	0.0888923	0.0163516	0.100461	0.0109388		4.049	0.0395133	0.100461	0.00109892	0.945691		1422.85	13.8853	1721.29	28.1459
RD2488-780.5m (OD1076-M4-Zr)	AP28A0114	rejected	1565.59	22.9914	11.4957	1553.58	11.1706	0.272715	0.00739429	0.0809524	0.0129188	0.096916	0.00613322		3.66683	0.0271136	0.096916	0.000594408	0.95799		1554.57	11.4949	1573.37	20.3261
RD2488-780.5m (OD1076-M4-Zr)	AP28A0115	rejected	1623.37	31.2633	15.6316	1632.86	15.0512	0.288266	0.00943802	0.0925207	0.0138128	0.0999617	0.00840283		3.46901	0.0327406	0.0999617	0.000839961	0.965472		1632.86	15.411	1788.53	24.7046
RD2488-780.5m (OD1076-M4-Zr)	AP28A0116	rejected	1623.53	22.8702	11.4351	1645.25	11.8403	0.290746	0.007364	0.086123	0.0134348	0.0999701	0.0061471		3.43943	0.025328	0.0999701	0.000614526	0.966668		1645.25	12.1157	1669.82	22.4337
RD2488-780.5m (OD1076-M4-Zr)	AP28A0117	rejected	1595.74	32.5721	16.286	1535.77	15.0171	0.269982	0.0100555	0.0869068	0.0132241	0.0984904	0.00872328		3.70396	0.0372451	0.0984904	0.00085916	0.956679		1540.71	15.4926	1684.4	22.2747
RD2488-780.5m (OD1076-M4-Zr)	AP28A0118	rejected	2545.82	80.6883	40.3441	455.794	22.5544	0.0850142	0.0501846	0.113549	0.0551167	0.168804	0.0240763		11.7627	0.590308	0.168804	0.00406417	0.871646		525.983	26.3962	2173.87	119.816
RD2488-780.5m (OD1076-M4-Zr)	AP28A0119	rejected	2028.07	29.5589	14.7794	1342.95	25.4528	0.242572	0.0196217	0.137066	0.0141877	0.124949	0.00834695		4.12249	0.0808901	0.124949	0.00104294	0.943599		1400.05	27.4714	2596.28	36.8353
RD2488-780.5m (OD1076-M4-Zr)	AP28A0120	rejected	2157	54.9889	27.4944	449.118	16.3058	0.0798645	0.0369456	0.153139	0.0264854	0.134458	0.0157555		12.5212	0.462604	0.134458	0.00211846	0.869404		495.314	18.2997	2879.99	76.2777
RD2488-780.5m (OD1076-M4-Zr)	AP28A0121	rejected	1818.18	54.9901	27.495	1615.06	22.0608	0.288589	0.0139413	0.0993652	0.0170081	0.111143	0.0151465		3.46514	0.0483087	0.111143	0.00168343	0.965627		1634.47	22.7867	1914.76	32.5665
RD2488-780.5m (OD1076-M4-Zr)	AP28A0122	rejected	1451.54	56.5301	28.2651	795.521	44.4164	0.135527	0.0576439	0.0757113	0.0303977	0.0912365	0.0148524		7.37858	0.42533	0.0912365	0.00135508	0.894031		819.322	47.2289	1475.13	44.8406
RD2488-780.5m (OD1076-M4-Zr)	AP28A0123	rejected	1986.72	46.7509	23.3755	931.887	14.3581	0.165813	0.0158116	0.110246	0.0189331	0.122072	0.0131387		6.03088	0.095358	0.122072	0.00160387	0.907779		989.003	15.6377	2113.84	40.0214
RD2488-780.5m (OD1076-M4-Zr)	AP28A0124	rejected	1798.78	38.4822	19.2411	1036.82	19.7938	0.182321	0.0197475	0.0904926	0.0168929	0.109962	0.0105744		5.48483	0.108312	0.109962	0.00116278	0.91537		1079.64	21.3203	1750.98	29.579
RD2488-780.5m (OD1076-M4-Zr)	AP28A0126	rejected	1867.92	42.9474	21.4737	972.093	12.3799	0.171494	0.0130756	0.0971221	0.0210818	0.114239	0.0119011		5.8311	0.0762451	0.114239	0.00135957	0.910384		1020.34	13.3415	1873.48	39.4963
RD2488-780.5m (OD1076-M4-Zr)	AP28A0127	rejected	3095.62	48.8964	24.4482	1712.39	46.8519	0.356727	0.0276949	0.921311	0.0388804	0.236359	0.0153313		2.80327	0.0776363	0.236359	0.00362369	0.998731		1966.64	54.4659	13198.7	513.173
RD2488-780.5m (OD1076-M4-Zr)	AP28A0128	rejected	2254.2	25.1234	12.5617	795.986	24.3777	0.144729	0.0315852	0.109358	0.0231392	0.142202	0.00727511		6.90949	0.218238	0.142202	0.00103454	0.898183		871.346	27.5217	2097.66	48.5383
RD2488-780.5m (OD1076-M4-Zr)	AP28A0129	rejected	2323.12	42.6268	21.3134	1086.73	16.7426	0.200739	0.0157811	0.184685	0.0199609	0.148015	0.0124344		4.9816	0.0786152	0.148015	0.00184048	0.923915		1179.29	18.6105	3425.5	68.376
RD2488-780.5m (OD1076-M4-Zr)	AP28A0130	rejected	1833.97	27.0485	13.5243	1147.89	16.4128	0.203074	0.0148037	0.113206	0.0147363	0.112114	0.00746464		4.92431	0.072898	0.112114	0.000836894	0.925004		1191.81	17.6432	2167.64	31.9429
RD2488-780.5m (OD1076-M4-Zr)	AP28A0131	rejected	2526.64	34.1367	17.0683	900.304	12.1563	0.169627	0.0137058	0.217043	0.0146547	0.166885	0.0101667		5.89528	0.0807992	0.166885	0.00169666	0.909527		1010.06	13.8436	3970.16	58.1813
RD2488-780.5m (OD1076-M4-Zr)	AP28A0132	rejected	1683.24	56.0009	28.0005	680.168	10.2992	0.117118	0.0154491	0.0919354	0.0302086	0.103244	0.0151677		8.53838	0.13191	0.103244	0.00156597	0.885792		713.956	11.0299	1777.7	53.7019
RD2488-780.5m (OD1076-M4-Zr)	AP28A0133	rejected	1649.51	26.4049	13.2025	966.551	12.0996	0.167783	0.0129369	0.0764472	0.0167805	0.101379	0.00712095		5.96006	0.0771046	0.101379	0.000721913	0.908682		999.887	12.9354	1488.95	24.9853
RD2488-780.5m (OD1076-M4-Zr)	AP28A0134	rejected	1705.01	34.9682	17.4841	963.363	12.6351	0.167852	0.0135289	0.0714337	0.0212599	0.10447	0.00949717		5.95761	0.0806002	0.10447	0.000992171	0.908713		1000.27	13.5326	1394.6	29.649
RD2488-780.5m (OD1076-M4-Zr)	AP28A0135	rejected	2191.43	32.1928	16.0964	1302.22	11.7492	0.238527	0.00920319	0.256742	0.0264499	0.137143	0.00925898		4.19239	0.0385834	0.137143	0.0012698	0.94168		1379.04	12.6915	4618.95	122.171
RD2488-780.5m (OD1076-M4-Zr)	AP28A0136	rejected	1617.7	20.5981	10.2991	1603.96	12.2624	0.282743	0.00785672	0.0860467	0.0123977	0.0996575	0.00553224		3.53677	0.0277874	0.0996575	0.000551329	0.962811		1605.16	12.6113	1668.4	20.6844
RD2488-780.5m (OD1076-M4-Zr)	AP28A0137	rejected	1683.65	41.6773	20.8386	1429.03	18.1497	0.252019	0.0130874	0.0954821	0.0181168	0.103267	0.0112887		3.96796	0.0519301	0.103267	0.00116575	0.948092		1448.88	18.962	1843.24	33.3938
RD2488-780.5m (OD1076-M4-Zr)	AP28A0138	rejected	1750.37	18.6791	9.33954	1398.44	10.8211	0.24756	0.00799273	0.104289	0.0133349	0.107084	0.00510209		4.03943	0.0322861	0.107084	0.000546353	0.945969		1425.88	11.3967	2005.09	26.7376
RD2488-780.5m (OD1076-M4-Zr)	AP28A0138	rejected	1750.37	18.6791	9.33954	1398.44	10.8211	0.24756	0.00799273	0.104289	0.0133349	0.107084	0.00510209		4.03943	0.0322861	0.107084	0.000546353	0.945969		1425.88	11.3967	2005.09	26.7376
RD2488-780.5m (OD1076-M4-Zr)	AP28A0139	rejected	1655.43	42.4071	21.2036	1028.08	19.8199	0.178903	0.0199437	0.0681668	0.0192703	0.101703	0.0114451		5.58961	0.111477	0.101703	0.001164	0.913793		1060.98	21.1598	1332.87	25.6849
RD2488-780.5m (OD1076-M4-Zr)	AP28A0140	rejected	2183.65	37.4285	18.7143	1496.21	13.0158	0.274941	0.00880568	0.210836	0.0243882	0.13653	0.0107556		3.63714	0.0320275	0.13653	0.00146847	0.959059		1565.84	13.7883	3866.83	94.3049
RD2488-780.5m (OD1076-M4-Zr)	AP28A0141	rejected	2197.35	25.196	12.598	1313.95	15.673	0.240877	0.0122992	0.168718	0.0177525	0.137611	0.00725131		4.15149	0.0510602	0.137611	0.00099786	0.942795		1391.26	17.1114	3151.24	55.9424
RD2488-780.5m (OD1076-M4-Zr)	AP28A0142	rejected	1596.28	38.6319	19.316	1487.43	18.9701	0.261213	0.0131437	0.0815184	0.0174003	0.0985192	0.0103469		3.82829	0.0503178	0.0985192	0.00101937	0.95248		1496.05	19.6635	1583.95	27.5612
RD2488-780.5m (OD1076-M4-Zr)	AP28A0143	rejected	1617.01	33.2305	16.6153	1463.34	12.6609	0.257172	0.00889706	0.0896158	0.0134298	0.0996206	0.00892424		3.88845	0.0345958	0.0996206	0.000889038	0.95055		1475.36	13.1263	1734.72	23.2969
RD2488-780.5m (OD1076-M4-Zr)	AP28A0144	rejected	2545.84	142.217	71.1087	741.558	42.0006	0.139487	0.0575678	0.208481	0.10249	0.168806	0.0424358		7.16913	0.412711	0.168806	0.00716342	0.895815		841.761	48.4583	3827.48	392.28
RD2488-780.5m (OD1076-M4-Zr)	AP28A0145	rejected	3002.1	155.186	77.5931	726.927	52.2393	0.147493	0.0723347	0.492028	0.121124	0.222948	0.0482787		6.77996	0.490427	0.222948	0.0107636	0.899435		886.898	64.1535	8087.65	979.605
RD2488-780.5m (OD1076-M4-Zr)	AP28A0146	rejected	2455.51	27.9901	13.995	1338.68	12.7452	0.252453	0.0096809	0.157907	0.0150837	0.159986	0.00827706		3.96114	0.0383474	0.159986	0.00132422	0.948299		1451.11	14.0481	2963.39	44.6989
RD2488-780.5m (OD1076-M4-Zr)	AP28A0150	rejected	1988.69	59.4623	29.7311	1158.14	33.5707	0.207507	0.02999	0.116531	0.0172714	0.122207	0.0167149		4.81912	0.144525	0.122207	0.00204267	0.927074		1215.52	36.4534	2227.93	38.4794
RD2488-780.5m (OD1076-M4-Zr)	AP28A0151	rejected	2931.06	19.2851	9.64255	1315.33	14.4248	0.26554	0.0110891	0.256076	0.0134179	0.213336	0.00596312		3.76591	0.0417606	0.213336	0.00127215	0.954551		1518.13	16.8347	4608.24	61.8327
RD2488-780.5m (OD1076-M4-Zr)	AP28A0152	rejected	2781.14	31.9789	15.9895	924.573	23.886	0.180922	0.026561	0.178345	0.0200941	0.194565	0.00975705		5.52723	0.146809	0.194565	0.00189838	0.914724		1072.01	28.4737	3317.05	66.6531
RD2488-780.5m (OD1076-M4-Zr)	AP28A0153	rejected	2070.11	34.1107	17.0554	1612.79	13.3992	0.293925	0.00843093	0.126825	0.0148424	0.127958	0.00967872		3.40223	0.028684	0.127958	0.00123847	0.968203		1661.11	14.0047	2413.42	35.821
RD2488-780.5m (OD1076-M4-Zr)	AP28A0154	rejected	1919.89	49.4151	24.7076	1674.03	17.5232	0.301677	0.0105948	0.106026	0.0186115	0.117588	0.0137788		3.3148	0.0351195	0.117588	0.00162022	0.971951		1699.62	18.007	2036.86	37.9091
RD2488-780.5m (OD1076-M4-Zr)	AP28A0155	rejected	2592.1	49.2106	24.6053	1126.68	11.6274	0.215276	0.0100635	0.214705	0.0197626	0.173543	0.0147502		4.64519	0.0467468	0.173543	0.00255979	0.930714		1256.87	12.6485	3931.3	77.6928
RD2488-780.5m (OD1076-M4-Zr)	AP28A0156	rejected	2668.13	40.5615	20.2808	1623.22	16.4387	0.315696	0.0100032	0.203675	0.017432	0.181665	0.0122465		3.16761	0.0316863	0.181665	0.00222476	0.978746		1768.67	17.6925	3746.94	65.3166
RD2488-780.5m (OD1076-M4-Zr)	AP28A0157	rejected	2276.15	32.5264	16.2632	413.841	7.64791	0.0744624	0.0186925	0.19258	0.0211538	0.144024	0.009441		13.4296	0.251033	0.144024	0.00135973	0.86706		462.985	8.65435	3559.76	75.3025
RD2488-780.5m (OD1076-M4-Zr)	AP28A0158	rejected	2455.3	33.4291	16.7145	1289.03	19.1514	0.242852	0.0152585	0.129935	0.0185556	0.159966	0.00988524		4.11773	0.0628303	0.159966	0.0015813	0.943732		1401.51	21.3849	2469.13	45.8161
RD2488-780.5m (OD1076-M4-Zr)	AP28A0159	rejected	1823.75	31.9821	15.991	1308.67	13.1844	0.23237	0.0103835	0.103716	0.0142223	0.111484	0.00881517		4.30348	0.0446854	0.111484	0.000982752	0.938765		1346.91	13.9857	1994.59	28.3676
RD2488-780.5m (OD1076-M4-Zr)	AP28A0160	rejected	2269.37	33.6131	16.8066	474.592	9.07106	0.0855129	0.0193914	0.113937	0.0213345	0.143459	0.00974937		11.6941	0.226765	0.143459	0.00139863	0.871864		528.945	10.257	2180.91	46.5286
RD2488-780.5m (OD1076-M4-Zr)	AP28A0201	rejected	1563.01	38.0916	19.0458	641.631	7.51874	0.109413	0.0119731	0.0369031	0.0156983	0.0967826	0.0101579		9.13971	0.10943	0.0967826	0.000983112	0.882371		669.336	8.01401	732.46	11.4984
RD2488-780.5m (OD1076-M4-Zr)	AP28A0202	rejected	1717.37	42.8783	21.4392	644.987	7.95025	0.111183	0.0125606	0.0537466	0.0156961	0.105175	0.0116637		8.99416	0.112972	0.105175	0.00122673	0.883155		679.616	8.53636	1058.15	16.6088
RD2488-780.5m (OD1076-M4-Zr)	AP28A0203	rejected	1094.6	22.8395	11.4197	587.602	6.50751	0.0973917	0.0113529	0.0388167	0.0147302	0.0759821	0.00570387		10.2678	0.11657	0.0759821	0.000433392	0.877066		599.105	6.8016	769.727	11.3383
RD2488-780.5m (OD1076-M4-Zr)	AP28A0204	rejected	1241.3	23.1318	11.5659	649.256	7.79308	0.108682	0.012328	0.0461514	0.0150043	0.0818238	0.00590199		9.20116	0.113432	0.0818238	0.000482924	0.882047		665.088	8.1992	911.937	13.683
RD2488-780.5m (OD1076-M4-Zr)	AP28A0205	rejected	1923.32	46.1855	23.0928	768.85	8.77896	0.135319	0.0115942	0.0995319	0.0211372	0.117814	0.0128835		7.38994	0.0856803	0.117814	0.00151785	0.893938		818.139	9.48565	1917.83	40.5375
RD2488-780.5m (OD1076-M4-Zr)	AP28A0206	rejected	1784.2	24.1888	12.0944	686.05	6.52308	0.119043	0.00972028	0.0889607	0.0177138	0.109085	0.00663484		8.40036	0.0816538	0.109085	0.000723763	0.886649		725.051	7.04769	1722.56	30.5132
RD2488-780-Zr	DE07C158	rejected	2045.86	16.8484	8.4242	863.255	9.15805	0.154071	0.0108286	0.0802988	0.016896	0.126211	0.00953487		6.49051	0.0702834	0.126211	0.00120341	0.902421		923.743	10.0029	1561.15	26.3771
RD2488-780-Zr	DE07C159	rejected	1502.39	15.968	7.98402	868.519	10.6531	0.148827	0.0126467	0.0592442	0.0156755	0.0937157	0.0084483		6.71923	0.0849764	0.0937157	0.000791738	0.900039		894.383	11.311	1163.33	18.2358
RD2488-780-Zr	DE07C160	rejected	1629.85	10.9416	5.47082	1582.15	13.0914	0.278991	0.00851082	0.0836942	0.014023	0.100311	0.00588664		3.58435	0.0305057	0.100311	0.000590492	0.961005		1586.28	13.5005	1624.57	22.7814
RD2488-780-Zr	DE07C161	rejected	1620.12	13.3204	6.66022	1633.66	14.4815	0.288427	0.00908423	0.0886175	0.0152025	0.099787	0.00715743		3.46709	0.0314958	0.099787	0.000714219	0.965549		1633.66	14.8406	1716.19	26.0905
RD2488-780-Zr	DE07C162	rejected	1497.2	16.8256	8.41278	871.465	10.3866	0.1493	0.0122831	0.0492676	0.0152131	0.0934589	0.00889581		6.69791	0.0822713	0.0934589	0.000831392	0.900254		897.04	11.0185	972.054	14.788
RD2488-780-Zr	DE07C163	rejected	1139.31	10.8191	5.40955	1248.09	25.7051	0.213622	0.0212658	0.0405467	0.0163913	0.0777036	0.00543973		4.68116	0.0995485	0.0777036	0.000422687	0.929938		1248.09	26.5416	803.36	13.1681
RD2488-780-Zr	DE07C164	rejected	1354.69	22.3282	11.1641	483.979	7.68239	0.0809475	0.0161761	0.0366652	0.0197285	0.0867384	0.0115778		12.3537	0.199835	0.0867384	0.00100424	0.869875		501.776	8.11677	727.823	14.3589
RD2488-780-Zr	DE07C165	rejected	1562.16	21.1984	10.5992	1362.08	21.0465	0.237967	0.0159752	0.0757333	0.0154863	0.0967388	0.0113047		4.20226	0.0671322	0.0967388	0.00109361	0.941415		1376.12	21.9839	1475.54	22.8508
RD2488-780-Zr	DE07C166	rejected	1578.58	10.175	5.08752	1597.37	14.1595	0.281193	0.00911077	0.0824207	0.0136768	0.0975902	0.00543787		3.55628	0.0324005	0.0975902	0.000530683	0.962064		1597.37	14.5532	1600.81	21.8939
RD2488-780-Zr	DE07C167	rejected	1659.98	24.9484	12.4742	1545	19.8654	0.272756	0.0131874	0.0926907	0.0169357	0.101953	0.0134744		3.66629	0.0483488	0.101953	0.00137375	0.958009		1554.77	20.5034	1791.68	30.3432
RD2488-780-Zr	DE07C168	rejected	1563.95	17.2326	8.61631	1260.5	14.829	0.219629	0.0121664	0.0773375	0.0152526	0.0968311	0.00919202		4.55312	0.055395	0.0968311	0.000890074	0.932759		1279.92	15.5719	1505.66	22.9653
RD2488-780-Zr	DE07C169	rejected	1618.09	8.25793	4.12896	1499.44	11.9353	0.26375	0.00821803	0.0815446	0.0134256	0.0996787	0.00443605		3.79147	0.0311584	0.0996787	0.00044218	0.953694		1509	12.401	1584.44	21.2721
RD2488-780-Zr	DE07C170	rejected	1631.74	14.3272	7.16361	1595.54	15.2822	0.281459	0.00983801	0.101113	0.0162393	0.100413	0.00770997		3.55291	0.0349536	0.100413	0.00077418	0.962193		1598.71	15.7281	1946.87	31.6159
RD2488-780-Zr	DE07C171	rejected	1867.66	13.4439	6.72194	1905.06	15.7376	0.343829	0.00829575	0.0932222	0.0160021	0.114223	0.00745061		2.90842	0.0241276	0.114223	0.000851029	0.992438		1905.06	15.8039	1801.51	28.8278
RD2488-780-Zr	DE07C172	rejected	1578.64	21.3119	10.6559	1021.18	10.8709	0.17677	0.0109519	0.0604264	0.0217492	0.0975935	0.0113898		5.65705	0.0619557	0.0975935	0.00111157	0.91281		1049.31	11.4919	1185.87	25.7918
RD2488-780-Zr	DE07C173	rejected	1679.82	20.2947	10.1474	752.525	16.9067	0.129903	0.0231286	0.0544665	0.0178525	0.103053	0.0109887		7.69804	0.178045	0.103053	0.00113242	0.891504		787.313	18.2094	1071.95	19.1371
RD2488-780-Zr	DE07C174	rejected	2503.83	44.4156	22.2078	529.094	13.0257	0.0983359	0.0244063	0.240043	0.0566591	0.164636	0.0263962		10.1692	0.248193	0.164636	0.00434575	0.877481		604.649	14.7572	4348.59	246.387
RD2488-780-Zr	DE07C175	rejected	1740.1	25.6091	12.8045	734.012	11.3693	0.127172	0.0158467	0.0717632	0.0237069	0.106485	0.0139721		7.86339	0.124609	0.106485	0.00148782	0.89028		771.71	12.2291	1400.81	33.209
OFD1-391	AP19C536	ok	1578.08	59.9934	29.9967	1623	14.3886	0.286298	0.00892869	0.0848078	0.0154431	0.0975641	0.0160301		3.49287	0.0311867	0.0975641	0.00156397	0.964523		1623	14.4913	1645.33	25.4091
OFD1-391	AP19C537	ok	1577.25	47.1809	23.5905	1559.5	13.8545	0.273981	0.00906236	0.0809037	0.0141891	0.097521	0.0126053		3.64989	0.0330766	0.097521	0.00122928	0.958598		1560.98	14.1461	1572.46	22.3119
OFD1-391	AP19C538	ok	1617.05	58.1582	29.0791	1587.2	16.2373	0.279686	0.010399	0.0815943	0.0164843	0.0996226	0.0156188		3.57544	0.037181	0.0996226	0.00155598	0.961339		1589.78	16.5321	1585.37	26.1338
OFD1-391	AP19C539	ok	1613.48	53.9034	26.9517	1592.27	16.1066	0.280545	0.0103001	0.0814967	0.0151317	0.0994318	0.0144694		3.56449	0.0367147	0.0994318	0.00143872	0.961753		1594.11	16.4195	1583.54	23.9617
OFD1-391	AP19C540	ok	1595.36	27.0058	13.5029	1593.4	11.6193	0.280438	0.00747617	0.0813932	0.0118161	0.0984704	0.00723219		3.56586	0.0266589	0.0984704	0.000712157	0.961701		1593.57	11.9138	1581.61	18.6884
OFD1-391	AP19C541	ok	1601.69	31.4163	15.7082	1588.98	12.0116	0.279744	0.00773856	0.0819043	0.0129103	0.0988049	0.00842028		3.5747	0.027663	0.0988049	0.000831965	0.961367		1590.07	12.3049	1591.16	20.5424
OFD1-391	AP19C542	ok	1586.37	35.2753	17.6376	1589.67	12.0984	0.279664	0.00777614	0.080749	0.0129738	0.0979978	0.00943572		3.57573	0.0278053	0.0979978	0.00092468	0.961329		1589.67	12.3615	1569.57	20.3632
OFD1-391	AP19C543	ok	1598.91	42.2816	21.1408	1578.16	12.8775	0.277732	0.00832068	0.0804448	0.0129929	0.0986577	0.0113283		3.60059	0.0299594	0.0986577	0.00111763	0.9604		1579.93	13.1461	1563.88	20.3193
OFD1-391	AP19C544	ok	1532.02	56.16	28.08	1571.92	13.4729	0.276146	0.00867204	0.0795447	0.0153676	0.0951994	0.0149151		3.62128	0.0314038	0.0951994	0.00141991	0.959638		1571.92	13.6318	1547.03	23.7741
OFD1-391	AP19C545	ok	1572.74	30.1428	15.0714	1600.77	11.3448	0.28187	0.00723931	0.0816954	0.0119903	0.0972865	0.00804849		3.54774	0.0256832	0.0972865	0.00078301	0.96239		1600.77	11.5885	1587.26	19.0317
OFD1-391	AP19C547	ok	1600.49	44.4063	22.2031	1588.92	14.7489	0.279714	0.00947858	0.0814942	0.0132142	0.0987415	0.0119		3.57509	0.0338867	0.0987415	0.00117503	0.961353		1589.92	15.0702	1583.5	20.9247
OFD1-391	AP19C548	ok	1564.68	47.5861	23.793	1589.92	16.3557	0.279713	0.0105	0.0826469	0.0164695	0.0968688	0.0126926		3.57509	0.0375385	0.0968688	0.00122952	0.961353		1589.92	16.6942	1605.03	26.4341
OFD1-391	AP19C549	ok	1612.94	51.7053	25.8526	1590.76	15.8626	0.280262	0.0101613	0.0817256	0.0144481	0.0994031	0.0138784		3.56809	0.0362565	0.0994031	0.00137956	0.961617		1592.68	16.1838	1587.82	22.941
OFD1-391	AP19C550	ok	1544.12	46.2885	23.1443	1588.14	14.2355	0.27936	0.00912172	0.0796389	0.0138218	0.0958136	0.0123131		3.57962	0.0326522	0.0958136	0.00117976	0.961183		1588.14	14.4865	1548.79	21.4072
OFD1-391	AP19C546	ok	1621.42	39.3237	19.6618	1524.25	13.5744	0.268317	0.00912372	0.0822369	0.0132845	0.099857	0.0105666		3.72693	0.0340035	0.099857	0.00105515	0.955881		1532.25	13.9799	1597.37	21.2203
OFD1-426-2	AP19C551	ok	1556.29	24.2249	12.1124	1504.32	10.4087	0.263639	0.00711983	0.0817443	0.0120822	0.0964364	0.00645437		3.79307	0.027006	0.0964364	0.000622436	0.95364		1508.43	10.7398	1588.17	19.1886
OFD1-426-2	AP19C552	ok	1610.7	27.977	13.9885	1600.3	12.0912	0.281956	0.00774336	0.0812457	0.0126229	0.0992836	0.00750725		3.54665	0.027463	0.0992836	0.000745347	0.962432		1601.21	12.3987	1578.85	19.9298
OFD1-426-2	AP19C553	ok	1570.39	62.1977	31.0988	1580.62	15.6311	0.277868	0.010026	0.0822563	0.0185473	0.0971645	0.0166024		3.59883	0.0360818	0.0971645	0.00161316	0.960465		1580.62	15.8472	1597.74	29.6337
OFD1-426-2	AP19C554	ok	1577.29	18.5515	9.27573	1624.81	13.4765	0.28666	0.00850195	0.0849003	0.0122027	0.097523	0.00495641		3.48846	0.0296587	0.097523	0.000483364	0.964697		1624.81	13.8141	1647.06	20.0986
OFD1-426-2	AP19C555	ok	1603.27	28.7324	14.3662	1580.47	11.6003	0.278226	0.00752251	0.0814447	0.0122743	0.0988887	0.0077025		3.5942	0.0270374	0.0988887	0.00076169	0.960637		1582.42	11.9038	1582.57	19.425
OFD1-426-2	AP19C556	ok	1605.26	47.852	23.926	1578.49	14.3848	0.2779	0.00928851	0.0813315	0.0132229	0.0989945	0.0128314		3.59841	0.0334239	0.0989945	0.00127023	0.960481		1580.78	14.6831	1580.46	20.8982
OFD1-426-2	AP19C557	ok	1593.13	23.1153	11.5576	1615.47	10.6783	0.284795	0.00676665	0.082396	0.0119187	0.0983528	0.00618851		3.5113	0.0237597	0.0983528	0.000608657	0.963799		1615.47	10.9313	1600.35	19.0741
OFD1-426-2	AP19C558	ok	1604.33	47.9227	23.9613	1558.33	14.0186	0.274223	0.00917179	0.0805335	0.0142871	0.098945	0.0128488		3.64667	0.0334464	0.098945	0.00127132	0.958714		1562.2	14.3282	1565.54	22.367
OFD1-426-2	AP19C559	ok	1591.44	53.5463	26.7732	1589.35	14.6662	0.279636	0.00937858	0.0810422	0.014271	0.0982639	0.0143325		3.57608	0.0335386	0.0982639	0.00140836	0.961315		1589.53	14.9075	1575.05	22.4775
OFD1-426-2	AP19C560	ok	1620.26	47.6166	23.8083	1573.5	14.8432	0.277251	0.00962333	0.0799816	0.0130652	0.0997945	0.0127931		3.60684	0.0347098	0.0997945	0.00127668	0.960169		1577.5	15.1808	1555.21	20.3191
OFD1-426-2	AP19C561	ok	1583.99	27.407	13.7035	1602.43	11.5469	0.282199	0.00737527	0.0811131	0.0130069	0.0978729	0.00732877		3.54359	0.026135	0.0978729	0.000717288	0.962549		1602.43	11.8184	1576.38	20.5038
OFD1-426-2	AP19C562	ok	1564.57	45.657	22.8285	1585.28	13.6936	0.278793	0.00879586	0.0820201	0.0140163	0.0968633	0.0121779		3.5869	0.0315498	0.0968633	0.00117959	0.96091		1585.28	13.9439	1593.33	22.3325
OFD1-426-2	AP19C563	ok	1592.71	44.0368	22.0184	1583.12	13.9264	0.278527	0.00897681	0.0789467	0.0145727	0.0983311	0.0117891		3.59032	0.0322296	0.0983311	0.00115923	0.960782		1583.94	14.2187	1535.83	22.3813
OFD1-426-2	AP19C564	ok	1592.86	47.5167	23.7584	1592.57	13.7841	0.280244	0.00880942	0.0791703	0.0140364	0.0983388	0.0127209		3.56832	0.0314348	0.0983388	0.00125096	0.961608		1592.59	14.0298	1540.02	21.6163
OFD1-426-2	AP19C565	ok	1562.46	46.0103	23.0052	1457.01	14.4439	0.255162	0.0101709	0.0812488	0.0153206	0.0967544	0.0122687		3.91908	0.0398605	0.0967544	0.00118705	0.949591		1465.04	14.9008	1578.91	24.1899
OFD1-499-9	AP19C569	rejected	1611.09	44.2569	22.1284	1311.06	17.6094	0.229438	0.0138681	0.0778938	0.0152533	0.0993043	0.0118763		4.35847	0.0604437	0.0993043	0.00117937	0.93738		1331.55	18.4661	1516.1	23.1254
OFD1-499-9	AP19C570	ok	1565.52	41.6719	20.8359	1587.85	12.1131	0.279304	0.00776006	0.0805353	0.0144428	0.0969124	0.0111163		3.58033	0.0277836	0.0969124	0.00107731	0.961156		1587.85	12.3218	1565.57	22.6112
OFD1-499-9	AP19C571	ok	1608.73	61.1584	30.5792	1571.7	17.4154	0.276726	0.0112808	0.0810656	0.0158064	0.0991791	0.0164068		3.61368	0.0407652	0.0991791	0.00162722	0.959917		1574.85	17.7656	1575.49	24.9028
OFD1-499-9	AP19C572	ok	1561.85	46.6515	23.3258	1585.11	12.9614	0.27876	0.00830903	0.0811349	0.0147165	0.0967227	0.0124387		3.58732	0.0298071	0.0967227	0.00120311	0.960894		1585.11	13.1707	1576.78	23.2047
OFD1-499-9	AP19C573	ok	1551.67	46.3997	23.1998	1467.17	13.8002	0.256836	0.0096381	0.0739127	0.0169413	0.0961996	0.012355		3.89353	0.0375262	0.0961996	0.00118854	0.950389		1473.64	14.203	1441.31	24.4177
OFD1-499-9	AP19C574	ok	1577.61	58.649	29.3245	1578.85	15.9257	0.277518	0.0102569	0.0820239	0.0152107	0.0975401	0.01567		3.60337	0.0369594	0.0975401	0.00152845	0.960297		1578.85	16.1941	1593.4	24.2367
OFD1-499-9	AP19C575	ok	1619.76	47.8975	23.9487	1565.77	13.6501	0.275838	0.00887616	0.0829051	0.01801	0.0997681	0.0128677		3.62532	0.0321789	0.0997681	0.00128379	0.95949		1570.37	13.9388	1609.85	28.9934
OFD1-499-9	AP19C576	ok	1562.47	66.5584	33.2792	1592.31	17.967	0.280188	0.0114472	0.0811813	0.0182005	0.0967549	0.0177479		3.56904	0.0408554	0.0967549	0.0017172	0.961581		1592.31	18.2274	1577.65	28.714
OFD1-499-9	AP19C577	ok	1583.38	32.8047	16.4024	1574.2	12.5338	0.27675	0.00815757	0.0808319	0.013298	0.0978413	0.00877145		3.61337	0.0294763	0.0978413	0.000858211	0.959928		1574.97	12.8479	1571.12	20.8927
OFD1-499-9	AP19C578	ok	1620.98	62.9215	31.4608	1587.1	18.9386	0.279736	0.0121545	0.0794449	0.0187798	0.0998334	0.0169066		3.5748	0.0434498	0.0998334	0.00168784	0.961364		1590.03	19.326	1545.16	29.0178
OFD1-499-9	AP19C579	ok	1578.68	50.7058	25.3529	1557.91	13.6788	0.273716	0.00893646	0.0788849	0.0148007	0.0975958	0.0135496		3.65342	0.0326487	0.0975958	0.00132238	0.95847		1559.64	13.9376	1534.67	22.7142
OFD1-499-9	AP19C580	ok	1604.45	34.3896	17.1948	1560.78	13.438	0.274669	0.00882731	0.0784272	0.0133694	0.0989515	0.00922049		3.64075	0.032138	0.0989515	0.000912382	0.958928		1564.46	13.8099	1526.1	20.4031
OFD1-499-9	AP19C581	ok	1565.22	59.2242	29.6121	1488.57	15.9952	0.260925	0.0109741	0.0812053	0.0150097	0.0968967	0.0157979		3.83252	0.0420586	0.0968967	0.00153077	0.952342		1494.57	16.4016	1578.1	23.6868
OFD1-499-9	AP19C582	ok	1568.41	29.2906	14.6453	1596.43	11.2876	0.281006	0.00722679	0.0813249	0.013192	0.097062	0.0078165		3.55864	0.0257175	0.097062	0.000758686	0.961975		1596.43	11.537	1580.33	20.8478
OFD1-499-9	AP19C583	ok	1578.04	29.1662	14.5831	1519.75	11.8228	0.266783	0.00799429	0.0803356	0.0125264	0.0975623	0.00779312		3.74837	0.0299656	0.0975623	0.000760315	0.955146		1524.45	12.1869	1561.83	19.5641
OFD2-431-6	AP19C584	ok	1727.19	23.3007	11.6504	947.338	11.2799	0.16523	0.0122986	0.0831258	0.0182181	0.105738	0.00634605		6.05215	0.0744327	0.105738	0.000671021	0.907513		985.779	12.1237	1613.97	29.4035
OFD2-431-6	AP19C585	ok	1611.76	20.353	10.1765	1594.62	10.3287	0.280942	0.00665112	0.0846116	0.0123785	0.0993401	0.00546219		3.55945	0.0236743	0.0993401	0.000542615	0.961944		1596.11	10.6159	1641.68	20.3216
OFD2-431-6	AP19C586	ok	1697.18	16.5156	8.25782	1137.24	8.38631	0.199151	0.00762619	0.0644909	0.0118158	0.104027	0.00448112		5.02132	0.0382936	0.104027	0.00046616	0.923175		1170.76	8.92842	1263.2	14.9257
OFD2-431-6	AP19C587	ok	1590.32	19.3812	9.69062	1405.24	22.0952	0.246205	0.016288	0.0664969	0.0173661	0.0982053	0.00518693		4.06166	0.0661561	0.0982053	0.000509384	0.945325		1418.87	23.1106	1301.25	22.5976
OFD2-431-6	AP19C588	ok	1777.73	19.2213	9.61066	925.859	8.65374	0.161963	0.00963748	0.0621934	0.0118552	0.108699	0.00526807		6.17425	0.0595042	0.108699	0.000572636	0.906019		967.676	9.32595	1219.52	14.4577
OFD2-431-6	AP19C590	ok	1593.49	25.8045	12.9022	1435.05	12.6665	0.251661	0.00910919	0.0820225	0.0120158	0.0983722	0.00690881		3.9736	0.0361963	0.0983722	0.000679635	0.947922		1447.04	13.1813	1593.37	19.1457
OFD2-431-6	AP19C591	ok	1666.76	16.1195	8.05975	1497.95	13.6048	0.264298	0.0093813	0.0846427	0.0121494	0.102327	0.00435676		3.7836	0.0354951	0.102327	0.000445815	0.953956		1511.8	14.1826	1642.26	19.9525
OFD2-431-6	AP19C592	ok	1771.66	23.3796	11.6898	481.171	7.65125	0.0827442	0.0162139	0.0460243	0.0149667	0.108338	0.00640293		12.0854	0.195953	0.108338	0.000693681	0.870657		512.482	8.30935	909.482	13.612
OFD2-431-6	AP19C593	ok	1623.61	15.2538	7.62692	977.115	15.4092	0.169385	0.0163352	0.0400561	0.0195385	0.0999747	0.0041		5.90371	0.0964382	0.0999747	0.000409897	0.909416		1008.72	16.4776	793.829	15.5102
OFD2-431-6	AP19C594	rejected	1795.27	28.0516	14.0258	451.156	6.84949	0.0776315	0.0154423	0.0285535	0.0158876	0.109751	0.00770488		12.8814	0.198919	0.109751	0.000845615	0.868434		481.97	7.44275	569.045	9.04075
OFD2-431-6	AP19C595	ok	1649.37	17.6672	8.83361	927.862	14.383	0.160851	0.0160389	0.0640635	0.0157367	0.101371	0.00476446		6.21693	0.0997124	0.101371	0.000482979	0.905511		961.505	15.4214	1255.08	19.7508
OFD2-431-6	AP19C596	ok	1671.92	19.7637	9.88187	969.719	8.58997	0.168608	0.00914527	0.0555421	0.0132814	0.102613	0.00534524		5.93091	0.0542397	0.102613	0.000548493	0.90906		1004.44	9.18586	1092.56	14.5107
OFD2-431-6	AP19C601	ok	1763.43	17.0474	8.5237	703.071	5.23422	0.121882	0.00761163	0.0490349	0.0129828	0.107851	0.00466398		8.20467	0.0624509	0.107851	0.000503017	0.887915		741.386	5.64315	967.571	12.5618
OFD2-431-6	AP19C589	ok	1931.44	20.115	10.0575	1151.49	8.14757	0.205298	0.00727819	0.125163	0.0190266	0.118348	0.00561648		4.87097	0.0354518	0.118348	0.000664701	0.926042		1203.72	8.76088	2383.58	45.3516
OFD2-431-6	AP19C600	rejected	1551.48	29.9626	14.9813	209.359	6.27828	0.0350185	0.0302807	0.0275602	0.0165056	0.0961898	0.00797803		28.5563	0.864704	0.0961898	0.000767405	0.850202		221.881	6.71872	549.514	9.07008
OFD3-450-3	AP19C614	ok	1632.89	30.5907	15.2953	814.99	15.776	0.140557	0.0199704	0.0591661	0.0279616	0.100475	0.00823217		7.11457	0.142081	0.100475	0.000827124	0.896298		847.809	16.9311	1161.84	32.4869
OFD3-450-3	AP19C615	ok	1600.94	16.8348	8.4174	1280.46	12.3344	0.223751	0.00998386	0.0893578	0.0131869	0.0987653	0.00451166		4.46926	0.0446205	0.0987653	0.000445596	0.934698		1301.66	12.9956	1729.93	22.8125
OFD3-450-3	AP19C616	ok	1596.38	31.7256	15.8628	1223.56	11.8735	0.213398	0.0100232	0.0598803	0.0136612	0.0985241	0.00849729		4.68609	0.0469696	0.0985241	0.000837188	0.929833		1246.89	12.4979	1175.46	16.0582
OFD3-450-3	AP19C617	ok	1703.1	28.7081	14.354	1472.73	13.6894	0.260324	0.00957392	0.0960345	0.0151161	0.104362	0.00779508		3.84137	0.036777	0.104362	0.000813508	0.952055		1491.5	14.2795	1853.43	28.0167
OFD3-450-3	AP19C618	ok	1598.53	51.1267	25.5633	1598.52	14.3286	0.281422	0.00911056	0.0827152	0.0156208	0.0986381	0.0136975		3.55339	0.0323733	0.0986381	0.00135109	0.962175		1598.52	14.5634	1606.31	25.0917
OFD3-450-3	AP19C619	ok	1659.77	27.833	13.9165	1569.99	11.3946	0.277304	0.00743908	0.0893524	0.0147411	0.101941	0.00751596		3.60615	0.0268264	0.101941	0.000766186	0.960194		1577.77	11.7372	1729.83	25.4996
OFD3-450-3	AP19C620	ok	1590.12	16.9738	8.48692	1523.26	12.93	0.267618	0.00875994	0.0807412	0.0120492	0.0981944	0.00454252		3.73667	0.032733	0.0981944	0.00044605	0.955546		1528.7	13.3913	1569.42	18.9102
OFD3-450-3	AP19C621	ok	1598.9	19.0559	9.52796	1534.46	12.1352	0.269796	0.00815209	0.0828593	0.0124499	0.0986576	0.00510556		3.70651	0.0302158	0.0986576	0.000503703	0.95659		1539.77	12.5523	1609	20.0319
OFD3-450-3	AP19C622	ok	1615.42	21.4472	10.7236	1454.65	11.5613	0.255567	0.0082028	0.0776102	0.0117662	0.0995357	0.00575858		3.91287	0.0320964	0.0995357	0.000573185	0.949784		1467.12	12.0345	1510.78	17.7761
OFD3-450-3	AP19C623	ok	1584.4	15.3572	7.6786	1600.74	9.81953	0.281862	0.00630225	0.0822814	0.0117749	0.0978944	0.00410681		3.54783	0.0223593	0.0978944	0.000402034	0.962387		1600.74	10.0882	1598.2	18.8186
OFD3-450-3	AP19C624	ok	1602.37	20.7699	10.385	1458.31	18.2699	0.256024	0.0129571	0.0776375	0.0133547	0.0988411	0.0055673		3.90589	0.0506091	0.0988411	0.000550278	0.950002		1469.47	19.0401	1511.29	20.1828
OFD3-450-3	AP19C628	ok	1586.2	19.9562	9.97809	1593.16	11.3727	0.280357	0.00733498	0.0816055	0.0117997	0.097989	0.00533792		3.56688	0.026163	0.097989	0.000523058	0.961662		1593.16	11.6858	1585.58	18.7094
OFD3-450-3	AP19C629	ok	1563.29	32.7893	16.3947	1542.19	11.5128	0.270613	0.00765021	0.0805322	0.0128851	0.0967969	0.00874428		3.69532	0.0282699	0.0967969	0.000846419	0.956981		1543.91	11.8112	1565.51	20.1717
OFD3-450-3	AP19C630	ok	1592.48	16.4546	8.22732	1417.41	13.5424	0.248445	0.0098884	0.0735562	0.0128207	0.098319	0.00440493		4.02504	0.0398012	0.098319	0.000433088	0.94639		1430.45	14.1449	1434.6	18.3926
OFD3-450-3	AP19C631	ok	1587.58	22.1492	11.0746	1490.09	10.9123	0.261555	0.00754697	0.0821214	0.0119098	0.0980614	0.00592557		3.82329	0.0288543	0.0980614	0.00058107	0.952644		1497.79	11.3038	1595.22	18.9988
OFD3-450-3	AP19C632	ok	1652.79	20.7858	10.3929	1386.44	12.4662	0.243761	0.00929779	0.0737162	0.0129433	0.101558	0.00560794		4.10238	0.0381431	0.101558	0.000569532	0.944163		1406.22	13.0747	1437.61	18.6075
OFD3-450-3	AP19C633	ok	1590.49	19.3113	9.65565	1567.52	14.7139	0.275657	0.00967291	0.0839493	0.0138398	0.0982139	0.00516832		3.6277	0.0350904	0.0982139	0.000507601	0.959403		1569.45	15.1812	1629.33	22.5496
PD4-391	AP19C460	rejected	1686.58	22.8439	11.422	1508.4	10.1754	0.266548	0.00693568	0.0827877	0.012299	0.103431	0.00618983		3.75167	0.0260204	0.103431	0.000640219	0.955033		1523.25	10.5648	1607.66	19.7726
PD4-391	AP19C455	rejected	2076.59	52.6256	26.3128	1596.63	12.2313	0.291066	0.00755513	0.110496	0.0165346	0.12843	0.0149432		3.43564	0.0259568	0.12843	0.00191915	0.966823		1646.85	12.4422	2118.38	35.0265
PD4-391	AP19C458	ok	1637.7	63.5359	31.768	1587.59	17.6057	0.280119	0.0112647	0.098374	0.0340448	0.100735	0.0171086		3.56991	0.0402141	0.100735	0.00172343	0.961548		1591.96	17.933	1896.53	64.5669
PD4-391	AP19C450	ok	1573.44	34.6843	17.3421	1592.25	11.6051	0.280176	0.00743677	0.0819115	0.0135058	0.0973228	0.00926195		3.56919	0.0265432	0.0973228	0.000901399	0.961575		1592.25	11.8412	1591.3	21.4917
PD4-391	AP19C451	ok	1587.92	18.9078	9.45389	1574.64	11.8591	0.276907	0.00775202	0.0813833	0.0117355	0.098079	0.00505863		3.61132	0.027995	0.098079	0.000496145	0.960003		1575.77	12.2154	1581.43	18.5589
PD4-391	AP19C452	ok	1589.89	24.4551	12.2275	1550.35	11.3357	0.27253	0.00751572	0.0811229	0.0126967	0.0981826	0.00654445		3.66932	0.0275776	0.0981826	0.000642551	0.957901		1553.63	11.6767	1576.56	20.0171
PD4-391	AP19C453	ok	1609.41	20.817	10.4085	1582.05	10.4707	0.278618	0.00679918	0.0813837	0.0117861	0.0992151	0.00558503		3.58914	0.0244032	0.0992151	0.000554119	0.960826		1584.4	10.7726	1581.43	18.6389
PD4-391	AP19C454	ok	1580.97	16.4933	8.24666	1610.49	9.94855	0.283803	0.0063367	0.080606	0.0115277	0.097715	0.00440865		3.52357	0.0223278	0.097715	0.000430792	0.963321		1610.49	10.2052	1566.89	18.0627
PD4-391	AP19C456	ok	1576.9	20.9791	10.4895	1605.32	11.163	0.282774	0.00712907	0.0809679	0.011962	0.0975031	0.00560472		3.53639	0.0252112	0.0975031	0.000546477	0.962826		1605.32	11.4444	1573.66	18.8241
PD4-391	AP19C457	ok	1587.23	26.9572	13.4786	1616.98	11.8041	0.285097	0.00746492	0.0823277	0.0127551	0.098043	0.00721154		3.50758	0.0261838	0.098043	0.000707041	0.963944		1616.98	12.0706	1599.07	20.3962
PD4-391	AP19C459	ok	1603.99	17.9862	8.99311	1626.87	11.0944	0.28707	0.00699352	0.0830014	0.0116913	0.0989271	0.00482216		3.48347	0.0243617	0.0989271	0.000477042	0.964895		1626.87	11.3775	1611.65	18.8423
PD4-391	AP19C461	rejected	1616.95	18.7136	9.35681	1281.85	20.9838	0.22423	0.0169825	0.0687439	0.013577	0.0996173	0.00502561		4.4597	0.0757369	0.0996173	0.000500637	0.934924		1304.19	22.1484	1343.79	18.2446
PD4-391	AP19C462	ok	1583.27	21.0493	10.5247	1607.91	10.6454	0.283291	0.00678527	0.0808222	0.0128572	0.0978356	0.00562817		3.52994	0.0239516	0.0978356	0.000550635	0.963074		1607.91	10.9101	1570.94	20.1978
PD4-391	AP19C463	ok	1585.84	19.2914	9.64568	1490.48	17.279	0.261598	0.011981	0.0788648	0.0156968	0.0979701	0.00515985		3.82266	0.0457993	0.0979701	0.000505511	0.952664		1498.01	17.9477	1534.3	24.0835
PD4-391	AP19C464	ok	1598.06	27.0969	13.5484	1566.8	12.4487	0.275655	0.00816064	0.0803785	0.0133511	0.0986129	0.00725913		3.62772	0.0296045	0.0986129	0.000715844	0.959402		1569.44	12.8077	1562.64	20.8629
PD4-391	AP19C465	rejected	1713.34	36.4038	18.2019	1581.15	12.7004	0.280316	0.00819993	0.0861046	0.0148139	0.104944	0.00989745		3.5674	0.0292524	0.104944	0.00103868	0.961643		1592.95	13.0621	1669.48	24.7315
PD4-411	AP19C485	ok	1580.99	17.2194	8.6097	1587.03	10.7289	0.27914	0.00695259	0.081938	0.0115355	0.0977165	0.00460275		3.58244	0.0249072	0.0977165	0.000449765	0.961077		1587.03	11.034	1591.79	18.3621
PD4-411	AP19C486	ok	1600.83	27.122	13.561	1590.23	11.4972	0.279956	0.0074117	0.0810733	0.0136553	0.0987597	0.00726851		3.57199	0.0264745	0.0987597	0.000717836	0.961469		1591.14	11.793	1575.63	21.5157
PD4-411	AP19C487	ok	1574.03	19.6985	9.84924	1610.73	10.9639	0.283852	0.00697576	0.0818092	0.0122041	0.0973536	0.00526061		3.52297	0.0245754	0.0973536	0.000512139	0.963345		1610.73	11.2361	1589.39	19.3971
PD4-411	AP19C488	ok	1586.93	25.1413	12.5706	1623.4	11.5909	0.286377	0.00730024	0.0826612	0.0128295	0.0980272	0.00672548		3.4919	0.0254917	0.0980272	0.000659281	0.964561		1623.4	11.8512	1605.3	20.5952
PD4-411	AP19C489	ok	1594.5	16.3233	8.16166	1624.9	11.4406	0.286676	0.00722313	0.0842927	0.0118073	0.0984253	0.00437093		3.48826	0.0251961	0.0984253	0.00043021	0.964705		1624.9	11.7368	1635.73	19.3136
PD4-411	AP19C490	ok	1599.51	20.1146	10.0573	1585.33	10.8807	0.279044	0.00705447	0.0812713	0.0119653	0.0986895	0.00538963		3.58367	0.0252808	0.0986895	0.000531899	0.961031		1586.55	11.1922	1579.33	18.8971
PD4-411	AP19C491	ok	1600.14	19.934	9.96702	1575.59	10.559	0.277286	0.00688971	0.0823031	0.0116431	0.098723	0.00534169		3.60639	0.024847	0.098723	0.000527348	0.960185		1577.68	10.8697	1598.61	18.6128
PD4-411	AP19C492	ok	1608.64	32.463	16.2315	1613.07	12.629	0.284318	0.00800528	0.0830939	0.0137621	0.0991741	0.00870867		3.51718	0.028156	0.0991741	0.000863675	0.963569		1613.07	12.9131	1613.37	22.2035
PD4-411	AP19C494	ok	1592.87	20.376	10.188	1593.06	11.2733	0.280338	0.00727263	0.080871	0.0117727	0.0983394	0.00545497		3.56713	0.0259424	0.0983394	0.000536438	0.961653		1593.06	11.5858	1571.85	18.5048
PD4-411	AP19C495	ok	1603.79	23.7898	11.8949	1595.96	11.2356	0.281049	0.00722398	0.0809747	0.0120055	0.0989163	0.00637795		3.5581	0.0257037	0.0989163	0.000630883	0.961995		1596.64	11.5341	1573.79	18.894
PD4-411	AP19C496	ok	1593.46	23.2336	11.6168	1594.51	11.2798	0.280625	0.00726144	0.0832331	0.0128663	0.0983702	0.00622045		3.56347	0.0258759	0.0983702	0.000611907	0.961791		1594.51	11.5785	1615.97	20.7916
PD4-411	AP19C498	ok	1591.26	23.4536	11.7268	1592.24	10.7671	0.280175	0.00693814	0.0808637	0.0121247	0.0982546	0.00627755		3.5692	0.0247636	0.0982546	0.000616798	0.961575		1592.24	11.0472	1571.71	19.0565
PD4-411	AP19C499	ok	1589.25	22.4282	11.2141	1613.93	10.628	0.28449	0.00674265	0.082467	0.0120128	0.0981487	0.00600152		3.51507	0.0237009	0.0981487	0.000589042	0.963652		1613.93	10.8822	1601.67	19.2406
PD4-411	AP19C497	rejected	1583.48	22.2863	11.1432	1478.52	14.8553	0.259391	0.010377	0.0770819	0.0148691	0.0978463	0.00595907		3.85518	0.040005	0.0978463	0.000583073	0.95161		1486.73	15.4277	1500.87	22.3166
PD4-411	AP19C493	rejected	1704.66	30.8801	15.44	1532.58	14.7205	0.271284	0.00987414	0.0832423	0.0142009	0.10445	0.00838648		3.68618	0.0363979	0.10445	0.00087597	0.957303		1547.31	15.2784	1616.14	22.9507
PD4-419	AP19C467	rejected	1600.88	23.9546	11.9773	1854.65	17.0449	0.33336	0.00917006	0.0970768	0.0128564	0.0987619	0.0064197		2.99976	0.027508	0.0987619	0.000634022	0.987336		1854.65	17.0072	1872.65	24.0754
PD4-419	AP19C466	ok	1598.69	22.8127	11.4064	1595.53	10.5202	0.280881	0.0067645	0.0816789	0.0118387	0.0986465	0.00611194		3.56022	0.0240831	0.0986465	0.000602921	0.961915		1595.8	10.7948	1586.95	18.7874
PD4-419	AP19C468	ok	1592.07	35.0007	17.5003	1603.67	12.9543	0.282446	0.00825452	0.0826498	0.0146723	0.0982972	0.00936922		3.5405	0.0292251	0.0982972	0.000920969	0.962668		1603.67	13.2375	1605.08	23.5503
PD4-419	AP19C469	ok	1570.22	23.0233	11.5116	1605.42	11.4352	0.282795	0.00729552	0.0811855	0.0127467	0.0971556	0.00614545		3.53614	0.0257979	0.0971556	0.000597065	0.962835		1605.42	11.7124	1577.73	20.1109
PD4-419	AP19C470	ok	1570.99	25.4088	12.7044	1386.69	11.9306	0.242552	0.00888658	0.0857086	0.0125457	0.0971955	0.00678289		4.12283	0.0366379	0.0971955	0.000659266	0.943589		1399.95	12.4408	1662.11	20.8524
PD4-419	AP19C471	ok	1580.16	18.1879	9.09395	1607.03	10.4104	0.283116	0.00664493	0.0811293	0.0115935	0.0976731	0.00486111		3.53212	0.0234707	0.0976731	0.000474799	0.96299		1607.03	10.6786	1576.68	18.2793
PD4-419	AP19C472	ok	1566.95	23.3819	11.691	1606.58	10.7093	0.283025	0.00682007	0.0812884	0.0126623	0.0969862	0.0062385		3.53325	0.024097	0.0969862	0.000605048	0.962947		1606.58	10.957	1579.65	20.002
PD4-419	AP19C473	ok	1616.47	34.5856	17.2928	1653.81	12.7738	0.292461	0.00785746	0.0861493	0.0139452	0.0995918	0.00928752		3.41926	0.0268667	0.0995918	0.000924961	0.967496		1653.81	12.9948	1670.31	23.2928
PD4-419	AP19C474	ok	1592.2	26.4565	13.2282	1602.44	11.6015	0.2822	0.00741691	0.0820348	0.0123975	0.0983042	0.00708218		3.54358	0.0262824	0.0983042	0.000696208	0.962549		1602.44	11.8851	1593.6	19.7566
PD4-419	AP19C475	ok	1574.22	23.0465	11.5232	1497.51	11.8572	0.262689	0.00816138	0.077696	0.0119361	0.0973635	0.00615487		3.80679	0.0310686	0.0973635	0.00059926	0.953186		1503.58	12.2713	1512.39	18.052
PD4-419	AP19C479	ok	1573.78	23.6404	11.8202	1551.51	25.0987	0.272474	0.0166944	0.0902253	0.0146869	0.0973406	0.00631313		3.67007	0.0612695	0.0973406	0.000614524	0.957875		1553.35	25.9322	1746.02	25.6437
PD4-419	AP19C480	ok	1563.2	27.6013	13.8007	1624.15	11.6335	0.286527	0.00730634	0.0829033	0.0135161	0.0967925	0.00736066		3.49008	0.0254997	0.0967925	0.000712457	0.964633		1624.15	11.8666	1609.82	21.7584
PD4-419	AP19C481	ok	1593.32	39.1347	19.5674	1583.22	12.0632	0.278556	0.00777063	0.0811464	0.0147264	0.0983631	0.0104776		3.58994	0.0278961	0.0983631	0.00103061	0.960796		1584.09	12.3093	1577	23.2236
PD4-419	AP19C482	ok	1604.64	25.4359	12.718	1564.91	12.3773	0.275423	0.00812852	0.0815065	0.0132301	0.0989617	0.00682001		3.63078	0.0295129	0.0989617	0.00067492	0.95929		1568.27	12.7477	1583.73	20.9529
PD4-419	AP19C483	ok	1623.82	24.9913	12.4957	1458.17	10.7985	0.256342	0.00762734	0.0868358	0.0124829	0.0999861	0.00671748		3.90105	0.0297546	0.0999861	0.000671655	0.950153		1471.1	11.2206	1683.08	21.0098
PD4-419	AP19C484	ok	1595.51	23.1263	11.5632	1616.64	11.0316	0.285029	0.00698782	0.081898	0.0121507	0.0984784	0.0061934		3.50842	0.0245162	0.0984784	0.000609916	0.963912		1616.64	11.2968	1591.04	19.3323
PD4-733	AP19C500	ok	1589.11	24.8642	12.4321	1613.2	11.9891	0.284343	0.00761146	0.0820635	0.012942	0.0981415	0.00665326		3.51688	0.0267686	0.0981415	0.000652961	0.963581		1613.2	12.2788	1594.14	20.6314
PD4-733	AP19C501	ok	1606.96	24.1329	12.0665	1601.42	11.4295	0.282095	0.00732191	0.0825041	0.0122312	0.0990849	0.0064726		3.54491	0.0259555	0.0990849	0.000641337	0.962499		1601.9	11.729	1602.36	19.5988
PD4-733	AP19C502	ok	1595.07	22.3278	11.1639	1605.65	10.5769	0.282841	0.00675283	0.0833772	0.0119328	0.098455	0.00597921		3.53556	0.023875	0.098455	0.000588683	0.962858		1605.65	10.8427	1618.66	19.3151
PD4-733	AP19C503	ok	1585.55	22.6042	11.3021	1587.79	10.6422	0.279291	0.00687971	0.08136	0.0123747	0.0979546	0.00604572		3.5805	0.0246328	0.0979546	0.000592206	0.961149		1587.79	10.9235	1580.99	19.5643
PD4-733	AP19C504	ok	1617.07	27.8426	13.9213	1591.43	11.6237	0.280455	0.00748467	0.0808545	0.0137009	0.0996237	0.00747734		3.56564	0.0266876	0.0996237	0.00074492	0.961709		1593.65	11.928	1571.54	21.5315
PD4-733	AP19C505	ok	1600.23	26.8208	13.4104	1383.73	9.73736	0.242453	0.00724749	0.0808773	0.0118215	0.0987277	0.0071872		4.12451	0.0298923	0.0987277	0.000709576	0.943542		1399.44	10.1424	1571.97	18.5831
PD4-733	AP19C506	ok	1624.6	27.5965	13.7982	1581.22	11.1172	0.27873	0.00720386	0.0809065	0.0131197	0.100028	0.00741847		3.5877	0.0258453	0.100028	0.000742054	0.96088		1584.96	11.4179	1572.51	20.631
PD4-733	AP19C510	ok	1599.95	28.0077	14.0039	1592.92	12.3578	0.28043	0.00795598	0.0811293	0.0133719	0.0987129	0.007505		3.56595	0.0283706	0.0987129	0.00074084	0.961698		1593.53	12.6781	1576.68	21.0832
PD4-733	AP19C511	ok	1600.64	22.3255	11.1628	1605.13	11.474	0.282737	0.00733623	0.0813902	0.0118927	0.0987495	0.00598293		3.53685	0.0259472	0.0987495	0.000590812	0.962808		1605.13	11.7756	1581.56	18.809
PD4-733	AP19C512	ok	1601.28	20.9971	10.4985	1638.68	16.3702	0.28943	0.0102425	0.0868361	0.0129105	0.0987833	0.00562739		3.45507	0.0353884	0.0987833	0.000555892	0.966033		1638.68	16.7841	1683.09	21.7296
PD4-733	AP19C513	ok	1592.51	33.4133	16.7067	1610.46	11.6565	0.283797	0.00738312	0.0820363	0.0137527	0.0983204	0.00894483		3.52364	0.0260155	0.0983204	0.000879459	0.963318		1610.46	11.8902	1593.63	21.9167
PD4-733	AP19C514	ok	1590.56	27.949	13.9745	1595.01	11.0521	0.280724	0.00709399	0.0828057	0.0128435	0.0982178	0.00748012		3.56222	0.0252703	0.0982178	0.00073468	0.961839		1595.01	11.315	1607.99	20.6524
PD4-733	AP19C515	ok	1588.2	24.2597	12.1299	1596.76	10.8062	0.281072	0.00693693	0.0803305	0.0123574	0.098094	0.00649074		3.55781	0.0246803	0.098094	0.000636702	0.962006		1596.76	11.0766	1561.74	19.299
PD4-733	AP19C516	ok	1592.74	35.4491	17.7246	1583.52	11.8067	0.278601	0.00761682	0.0799876	0.0129241	0.0983326	0.00949011		3.58937	0.0273396	0.0983326	0.000933187	0.960817		1584.31	12.0674	1555.32	20.1011
PD4-733	AP19C517	ok	1613.24	19.586	9.79302	1597.13	10.639	0.281424	0.00684329	0.0811729	0.0117259	0.0994191	0.00525737		3.55336	0.0243167	0.0994191	0.000522683	0.962176		1598.53	10.9392	1577.49	18.4976
PD4-761	AP19C518	ok	1565.87	30.2077	15.1039	1617.62	12.8739	0.285225	0.00812596	0.0823822	0.0134001	0.0969304	0.00805855		3.506	0.0284896	0.0969304	0.000781118	0.964006		1617.62	13.1447	1600.09	21.4413
PD4-761	AP19C519	ok	1611.99	18.3406	9.17029	1615.91	10.7007	0.284883	0.00679954	0.0825853	0.0117751	0.0993527	0.00492227		3.51021	0.0238678	0.0993527	0.000489041	0.963841		1615.91	10.9874	1603.88	18.8858
PD4-761	AP19C520	ok	1626.07	23.9983	11.9992	1528.32	18.6056	0.269135	0.0125615	0.083621	0.0116613	0.100107	0.00645243		3.71561	0.0466735	0.100107	0.000645931	0.956273		1536.41	19.2996	1623.21	18.9287
PD4-761	AP19C521	ok	1581.57	25.1597	12.5799	1619.82	11.2803	0.285662	0.00711885	0.0808266	0.012626	0.0977463	0.0067257		3.50064	0.0249205	0.0977463	0.000657412	0.964217		1619.82	11.5312	1571.02	19.8356
PD4-761	AP19C522	ok	1599.52	19.3319	9.66593	1604.51	10.3523	0.282614	0.00662384	0.081519	0.0116039	0.0986904	0.00517992		3.5384	0.0234378	0.0986904	0.000511208	0.962748		1604.51	10.628	1583.96	18.3802
PD4-761	AP19C523	ok	1607.18	26.8068	13.4034	1581.81	11.2723	0.278537	0.00730686	0.0801514	0.01243	0.0990964	0.00718994		3.59019	0.026233	0.0990964	0.000712497	0.960787		1583.99	11.574	1558.39	19.3707
PD4-761	AP19C524	ok	1652.24	19.2374	9.61868	1606.84	9.98111	0.283882	0.00637484	0.084214	0.0116425	0.101528	0.0051898		3.52259	0.022456	0.101528	0.000526912	0.963359		1610.88	10.2691	1634.27	19.027
PD4-761	AP19C525	ok	1605.08	21.0517	10.5259	1574.5	10.1905	0.277173	0.00664872	0.0808081	0.0114387	0.0989847	0.00564482		3.60785	0.0239876	0.0989847	0.000558751	0.960131		1577.11	10.4858	1570.67	17.9665
PD4-761	AP19C527	ok	1582.24	19.0848	9.54241	1612.19	10.3455	0.284142	0.00657702	0.0818982	0.0117206	0.0977816	0.00510221		3.51936	0.0231469	0.0977816	0.000498902	0.963485		1612.19	10.6034	1591.05	18.6481
PD4-761	AP19C528	ok	1594.34	18.8261	9.41306	1595.33	10.2745	0.280788	0.00661719	0.081149	0.0118715	0.0984167	0.005041		3.56141	0.0235665	0.0984167	0.000496118	0.961869		1595.33	10.5566	1577.05	18.7219
PD4-761	AP19C529	ok	1593.84	23.7331	11.8665	1642.51	11.6678	0.290196	0.00725562	0.0847531	0.01225	0.0983903	0.00635451		3.44595	0.0250025	0.0983903	0.000625222	0.966403		1642.51	11.9174	1644.31	20.1429
PD4-761	AP19C530	ok	1619.67	31.6246	15.8123	1588.12	11.1731	0.279898	0.00719133	0.0791662	0.0141736	0.0997631	0.00849588		3.57273	0.0256927	0.0997631	0.000847576	0.961442		1590.85	11.4403	1539.94	21.8266
PD4-761	AP19C531	ok	1599.88	25.6242	12.8121	1596.19	11.0676	0.281022	0.007108	0.0808976	0.0128873	0.0987095	0.00686625		3.55844	0.0252934	0.0987095	0.000677764	0.961982		1596.51	11.348	1572.35	20.2633
PD4-761	AP19C532	ok	1615.92	21.3648	10.6824	1597.73	10.0895	0.281581	0.00647891	0.0819023	0.0117986	0.0995625	0.00573683		3.55138	0.0230091	0.0995625	0.000571173	0.962251		1599.32	10.3618	1591.12	18.7731
PD4-761	AP19C526	rejected	1913	32.1896	16.0948	1609.22	11.3048	0.28954	0.0071335	0.104526	0.0173699	0.117137	0.00896831		3.45375	0.0246373	0.117137	0.00105052	0.966086		1639.23	11.6935	2009.43	34.9036
HRD10-441m	JN01B0618	ok	1850.46	12.1471	6.07355	1875.87	20.3079	0.337758	0.010945	0.0995374	0.016005	0.11314	0.00671795		2.9607	0.0324049	0.11314	0.00076007	0.989478		1875.87	20.5315	1917.93	30.6964
HRD10-441m	JN01B0619	ok	1833.12	14.5566	7.27832	1811.09	18.2566	0.324885	0.0102356	0.101234	0.0172569	0.112062	0.00803361		3.07802	0.0315054	0.112062	0.00090026	0.983211		1813.54	18.5627	1949.1	33.6354
HRD10-441m	JN01B0620	ok	1847.53	16.4472	8.22358	1066.77	19.3885	0.188461	0.0188117	0.11384	0.0191969	0.112957	0.00909287		5.30615	0.0998175	0.112957	0.0010271	0.91821		1113.03	20.938	2179.15	41.8329
HRD10-441m	JN01B0621	ok	1815.79	12.4267	6.21336	1566.41	14.8223	0.279596	0.00972877	0.101753	0.014837	0.110996	0.00684366		3.57658	0.0347958	0.110996	0.000759621	0.961296		1589.33	15.4622	1958.62	29.0601
HRD10-441m	JN01B0622	ok	1807.82	11.4711	5.73554	1707.22	15.3962	0.305291	0.00922264	0.0980165	0.0152138	0.11051	0.0063112		3.27557	0.0302094	0.11051	0.000697453	0.973701		1717.49	15.8398	1889.95	28.7534
HRD10-441m	JN01B0623	ok	1870.37	20.2841	10.1421	1704.92	17.402	0.306245	0.0103725	0.109104	0.0185511	0.114394	0.0112451		3.26536	0.0338698	0.114394	0.00128638	0.974163		1722.2	17.8635	2093.02	38.8278
HRD10-441m	JN01B0624	ok	1795.97	15.3985	7.69924	1322.07	16.4085	0.234352	0.0128286	0.0935152	0.018581	0.109793	0.00845967		4.26709	0.0547407	0.109793	0.000928812	0.939703		1357.27	17.4118	1806.92	33.5745
HRD10-441m	JN01B0625	ok	1818.86	15.3647	7.68235	1669.54	15.0388	0.298612	0.00919864	0.0943766	0.0200494	0.111184	0.00846483		3.34883	0.0308047	0.111184	0.000941152	0.970468		1684.42	15.4944	1822.84	36.5469
HRD10-441m	JN01B0626	ok	1890.12	10.9522	5.47611	1088.6	10.2445	0.193088	0.00971214	0.0781797	0.0247159	0.115655	0.00608612		5.179	0.0502991	0.115655	0.000703893	0.920356		1138.08	11.0532	1521.46	37.6042
HRD10-441m	JN01B0627	ok	1839.87	28.9574	14.4787	1527.8	34.5293	0.272975	0.0232689	0.0750901	0.0313454	0.11248	0.0159943		3.66335	0.0852421	0.11248	0.00179905	0.958115		1555.88	36.2037	1463.46	45.8725
HRD10-441m	JN01B0628	ok	1504.4	16.0029	8.00146	524.1	10.221	0.0886057	0.0199407	0.15736	0.0164136	0.0938153	0.00846902		11.286	0.22505	0.0938153	0.000794523	0.873214		547.286	10.9133	2953.84	48.483
HRD10-441m	JN01B0629	ok	1854.26	23.7277	11.8638	1640.12	20.7462	0.293959	0.0129087	0.0840856	0.0232546	0.113379	0.0131286		3.40184	0.0439135	0.113379	0.00148851	0.968219		1661.28	21.445	1631.87	37.9485
HRD10-441m	JN01B0630	ok	1857.72	13.2128	6.6064	1923.68	17.1033	0.347714	0.00890736	0.100787	0.0165687	0.113596	0.00731377		2.87592	0.0256169	0.113596	0.000830816	0.994333		1923.68	17.1349	1940.89	32.1579
HRD10-441m	JN01B0631	ok	1833.29	14.7785	7.38923	1782.05	19.3303	0.319571	0.0110402	0.0961021	0.0202877	0.112072	0.0081562		3.12919	0.0345469	0.112072	0.000914083	0.980628		1787.63	19.7358	1854.68	37.6272
HRD10-441m	JN01B0632	ok	1831.57	18.5676	9.28381	1859.82	21.9644	0.334431	0.0119172	0.103594	0.0189425	0.111966	0.0102453		2.99016	0.0356344	0.111966	0.00114712	0.987857		1859.82	22.1639	1992.37	37.7405
HRD10-441m	JN01B0633	ok	1929.47	26.1232	13.0616	820.747	22.2297	0.144789	0.0278962	0.0697299	0.0478695	0.118219	0.0145848		6.90658	0.192668	0.118219	0.00172419	0.898211		871.689	24.3168	1362.43	65.2188
HRD10-441m	JN01B0637	ok	1803.53	16.5967	8.29837	1080.05	10.8175	0.190249	0.0103088	0.137466	0.0177688	0.11025	0.00912645		5.25628	0.0541857	0.11025	0.00100619	0.919038		1122.72	11.5739	2603.39	46.2592
HRD10-441m	JN01B0638	ok	1841.42	12.7871	6.39354	1787.97	19.8225	0.320842	0.011294	0.0938245	0.016571	0.112577	0.00706415		3.1168	0.0352011	0.112577	0.00079526	0.981246		1793.84	20.2596	1812.64	30.0373
HRD10-441m	JN01B0639	ok	1836.41	12.2052	6.10262	1599.34	14.3089	0.286074	0.00918378	0.0915899	0.0144182	0.112266	0.00673861		3.4956	0.0321028	0.112266	0.000756514	0.964415		1621.88	14.895	1771.3	25.539
HRD10-441m	JN01B0640	ok	1819.1	16.6022	8.30111	1821.44	16.5745	0.32651	0.00920527	0.10496	0.0175748	0.111199	0.00914689		3.0627	0.0281929	0.111199	0.00101712	0.984002		1821.44	16.7669	2017.37	35.4549
HRD10-441m	JN01B0641	ok	1800.06	18.0284	9.01422	1212.34	13.703	0.214332	0.0116551	0.0835746	0.0190584	0.11004	0.0099095		4.66567	0.0543788	0.11004	0.00109044	0.930271		1251.85	14.5905	1622.34	30.9193
HRD10-441m	JN01B0642	ok	1814.27	13.3365	6.66826	1608.82	14.1249	0.287361	0.0090009	0.105599	0.0166449	0.110903	0.00734333		3.47995	0.0313227	0.110903	0.000814399	0.965035		1628.33	14.6564	2029.05	33.7732
HRD10-441m	JN01B0643	ok	1613.78	14.8627	7.43133	1615.69	19.8675	0.284839	0.0126382	0.0960968	0.0187521	0.099448	0.00797956		3.51076	0.0443696	0.099448	0.000793552	0.96382		1615.69	20.4193	1854.58	34.7773
HRD10-441m	JN01B0644	ok	1873	12.6021	6.30107	1403.3	14.5652	0.250673	0.0107131	0.100739	0.0183057	0.114562	0.00698861		3.98926	0.0427372	0.114562	0.000800628	0.947451		1441.95	15.4476	1940	35.5131
HRD10-441m	JN01B0645	ok	1885.21	10.4661	5.23307	1869.66	15.328	0.336851	0.00829829	0.0984379	0.0139355	0.115341	0.0058126		2.96867	0.0246349	0.115341	0.00067043	0.989037		1871.5	15.5303	1897.71	26.4455
HRD10-441m	JN01B0646	ok	1843.09	21.5674	10.7837	932.202	20.3014	0.163921	0.0224888	0.0851319	0.0223052	0.11268	0.0119172		6.10048	0.137192	0.11268	0.00134283	0.906914		978.533	22.006	1651.37	36.8341
HRD10-441m	JN01B0647	ok	1841.63	16.5769	8.28845	1637.61	24.8865	0.293227	0.0156045	0.0811182	0.0200695	0.11259	0.00915804		3.41033	0.0532164	0.11259	0.0010311	0.967866		1657.63	25.8665	1576.47	31.639
HRD10-441m	JN01B0648	ok	1759.9	13.5603	6.78013	1122.94	12.6801	0.197429	0.0116746	0.0769441	0.0180704	0.107643	0.00741662		5.0651	0.0591333	0.107643	0.000798349	0.922374		1161.5	13.56	1498.28	27.0745
HRD10-441m	JN01B0649	ok	1868.73	15.3191	7.65956	1345.98	33.958	0.240028	0.0261515	0.102291	0.0195468	0.114291	0.00849096		4.16619	0.108952	0.114291	0.000970439	0.942392		1386.84	36.268	1968.49	38.4776
HRD10-441m	JN01B0650	ok	1725.81	10.0758	5.03789	830.484	11.9397	0.144245	0.014833	0.0826029	0.0154567	0.105659	0.0054874		6.93266	0.102832	0.105659	0.000579794	0.897964		868.622	12.8843	1604.21	24.7957
HRD10-441m	JN01B0651	ok	1586.41	10.7996	5.39981	1120.39	20.7229	0.194667	0.0191879	0.0761853	0.0169194	0.0979997	0.00577757		5.13696	0.0985676	0.0979997	0.0005662	0.921089		1146.61	22.0011	1484.04	25.109
HRD10-441m	JN01B0652	ok	1858.85	16.0307	8.01537	1571.13	21.617	0.281344	0.0141549	0.0968615	0.0181069	0.113667	0.00887481		3.55436	0.0503117	0.113667	0.00100877	0.962137		1598.13	22.6214	1868.68	33.836
HRD10-441m	JN01B0653	ok	1857.08	14.1208	7.06039	1796.69	20.4815	0.322803	0.0116	0.0994187	0.0161221	0.113556	0.00781575		3.09786	0.0359351	0.113556	0.000887523	0.982199		1803.4	20.9195	1915.75	30.8858
HRD10-441m	JN01B0654	ok	1825.13	13.9857	6.99285	1301.24	11.4889	0.231029	0.00909847	0.0856905	0.0157481	0.111569	0.00771101		4.32847	0.0393824	0.111569	0.000860311	0.938131		1339.89	12.1909	1661.77	26.1697
HRD10-441m	JN01B0655	ok	1585.76	13.3347	6.66734	614.273	7.13486	0.10479	0.0118865	0.0604353	0.0156614	0.097966	0.00713317		9.54286	0.113431	0.097966	0.000698808	0.880326		642.421	7.63611	1186.04	18.5751
HRD10-441m	JN01B0656	ok	1812.72	16.8206	8.41032	1419.76	25.1783	0.252577	0.0183389	0.0918739	0.0151507	0.110809	0.00926		3.95918	0.072607	0.110809	0.00102609	0.948358		1451.75	26.6235	1776.56	26.9162
HRD10-441m	JN01B0657	ok	1818.22	16.611	8.3055	1101.89	16.7432	0.194438	0.0157165	0.0586257	0.0219853	0.111145	0.00915074		5.14304	0.0808305	0.111145	0.00101706	0.920983		1145.37	18.0012	1151.52	25.3166
HRD10-441m	JN01B0658	ok	1854.11	11.3911	5.69553	1582	13.2873	0.283249	0.00862551	0.101509	0.0146932	0.113369	0.00630262		3.53046	0.030452	0.113369	0.000714523	0.963054		1607.71	13.8673	1954.15	28.7126
HRD10-441m	JN01B0659	ok	1796.44	20.0833	10.0417	788.693	11.6816	0.137501	0.0152035	0.0897853	0.0212108	0.109821	0.0110341		7.27266	0.11057	0.109821	0.00121178	0.89492		830.517	12.6268	1737.86	36.8615
HRD10-441m	JN01B0660	ok	2068.5	20.6538	10.3269	1056.77	23.4357	0.190129	0.0229244	0.142616	0.0252726	0.127841	0.0117187		5.25957	0.120573	0.127841	0.00149813	0.918983		1122.08	25.723	2694.7	68.1023
HRD10-441m	JN01B0661	ok	1863.77	15.8914	7.94568	1899.51	18.552	0.342673	0.00981375	0.107632	0.0170838	0.113977	0.00880288		2.91824	0.0286389	0.113977	0.00100333	0.991874		1899.51	18.6414	2066.17	35.2981
HRD10-441m	JN01B0662	ok	1899.95	18.855	9.42749	1705.81	23.0808	0.307084	0.0138198	0.103798	0.0178554	0.11629	0.01049		3.25644	0.0450032	0.11629	0.00121988	0.974569		1726.34	23.8576	1996.09	35.641
HRD10-441m	JN01B0663	ok	1657.13	11.3118	5.65589	239.346	5.54963	0.0403878	0.0234368	0.0589894	0.0194153	0.101796	0.00610714		24.76	0.580295	0.101796	0.000621685	0.85247		255.236	5.98192	1158.46	22.4919
HRD10-441m	JN01B0664	ok	1546.83	14.826	7.41302	505.459	5.58552	0.0856217	0.0112518	0.0491282	0.0187043	0.0959518	0.00789052		11.6793	0.131413	0.0959518	0.000757109	0.871911		529.591	5.95884	969.37	18.1314
HRD10-441m	JN01B0665	ok	1848.82	9.77522	4.88761	1820.2	17.2121	0.326918	0.00961946	0.0970151	0.0135418	0.113038	0.00540511		3.05887	0.0294247	0.113038	0.000610983	0.9842		1823.43	17.5404	1871.51	25.3437
HRD10-441m	JN01B0666	ok	1853.07	14.1265	7.06323	1466.79	15.8203	0.261994	0.0111155	0.10527	0.0165019	0.113304	0.00781511		3.81688	0.0424265	0.113304	0.000885485	0.952854		1500.04	16.6736	2023.03	33.3838
HRD10-441m	JN01B0667	ok	1824.32	9.91483	4.95742	1045.63	9.45444	0.184277	0.00933527	0.0888624	0.0150664	0.111519	0.005466		5.42662	0.0506589	0.111519	0.000609564	0.916274		1090.3	10.1782	1720.74	25.9252
HRD10-441m	JN01B0668	ok	1846.42	17.7959	8.89796	1862.11	19.4652	0.334904	0.0105434	0.106876	0.0151976	0.112888	0.00983722		2.98593	0.031482	0.112888	0.00111051	0.988088		1862.11	19.633	2052.38	31.1912
HRD10-441m	JN01B0669	ok	1843.54	11.9132	5.95661	1834.3	15.254	0.329374	0.00843125	0.099651	0.0143939	0.112708	0.00658308		3.03606	0.0255978	0.112708	0.000741968	0.985396		1835.35	15.4743	1920.02	27.6365
HRD10-441m	JN01B0670	ok	1810.86	18.1265	9.06327	1398.15	13.2689	0.248574	0.00974672	0.0905851	0.0187832	0.110695	0.00997664		4.02295	0.0392105	0.110695	0.00110436	0.946452		1431.12	13.9487	1752.69	32.9211
HRD10-414m	JN01B0674	ok	1599.36	21.5609	10.7804	552.84	10.1635	0.0941616	0.0187819	0.018066	0.0227612	0.0986816	0.0115541		10.62	0.199464	0.0986816	0.00114018	0.875647		580.102	10.8954	361.894	8.23713
HRD10-414m	JN01B0675	ok	2062.72	12.777	6.38851	1340.58	15.4141	0.242861	0.0118658	0.0891138	0.0146328	0.127423	0.00724472		4.11759	0.0488585	0.127423	0.000923141	0.943736		1401.55	16.6305	1725.4	25.2475
HRD10-414m	JN01B0676	ok	1513.08	13.9116	6.95582	448.847	5.26987	0.0756833	0.0119417	0.0132456	0.0185272	0.0942476	0.0073708		13.213	0.157785	0.0942476	0.00069468	0.867589		470.305	5.61623	265.966	4.92759
HRD10-414m	JN01B0677	ok	1853.5	36.2094	18.1047	1440.7	24.8574	0.257195	0.0176678	0.029633	0.0251293	0.113331	0.020033		3.88811	0.0686942	0.113331	0.00227035	0.95056		1475.47	26.0683	590.246	14.8325
HRD10-414m	JN01B0678	ok	1851.87	14.3462	7.1731	1709.18	15.9996	0.306614	0.00955221	0.0576063	0.0180987	0.113229	0.00793553		3.26143	0.0311538	0.113229	0.000898532	0.974342		1724.02	16.4683	1132.05	20.4887
HRD10-414m	JN01B0679	ok	1831.23	11.8447	5.92234	1719.09	16.0565	0.307978	0.00954521	0.0729453	0.0162361	0.111945	0.00653542		3.24699	0.0309932	0.111945	0.000731607	0.975002		1730.75	16.5204	1423.09	23.1054
HRD10-414m	JN01B0680	ok	1823.41	19.1056	9.5528	1704.67	35.5558	0.305159	0.0213727	0.0892277	0.021846	0.111463	0.0105317		3.27698	0.0700379	0.111463	0.0011739	0.973637		1716.84	36.6936	1727.52	37.7393
HRD10-414m	JN01B0681	ok	1672.03	10.7637	5.38185	745.944	9.47926	0.128665	0.013074	0.024319	0.0190398	0.102619	0.0058223		7.77214	0.101613	0.102619	0.00059748	0.890949		780.243	10.2009	485.659	9.24686
HRD10-414m	JN01B0682	ok	1868.56	16.3389	8.16947	1368.14	21.79	0.244108	0.0164714	0.0313822	0.0319019	0.11428	0.00905604		4.09656	0.0674759	0.11428	0.00103492	0.944328		1408.02	23.1919	624.554	19.9244
HRD10-414m	JN01B0683	ok	1619.19	10.9925	5.49625	681.019	8.70998	0.116747	0.0131349	0.0347375	0.0191541	0.0997372	0.00590586		8.56553	0.112508	0.0997372	0.000589034	0.885627		711.813	9.34963	690.203	13.2202
HRD10-414m	JN01B0684	ok	1812.04	14.4443	7.22214	1588.1	21.2036	0.283507	0.0137373	0.081346	0.0188095	0.110767	0.00795112		3.52725	0.0484547	0.110767	0.000880722	0.963179		1609	22.1033	1580.73	29.7328
HRD10-414m	JN01B0685	ok	1706.01	19.1084	9.55422	994.327	15.4059	0.173439	0.0160028	0.0764253	0.0180306	0.104527	0.0103808		5.7657	0.0922674	0.104527	0.00108508	0.911278		1031.03	16.4994	1488.54	26.8393
HRD10-414m	JN01B0686	ok	1713.93	15.7687	7.88436	519.274	6.13114	0.0890441	0.0120109	0.0140075	0.0219513	0.104978	0.00857503		11.2304	0.134887	0.104978	0.000900189	0.873406		549.882	6.60456	281.159	6.17181
HRD10-414m	JN01B0687	ok	1832.37	14.5966	7.29832	1504.35	15.3458	0.268509	0.0104965	0.0694547	0.0200036	0.112015	0.00805496		3.72428	0.0390919	0.112015	0.00090228	0.955973		1533.23	16.0935	1357.23	27.1494
HRD10-414m	JN01B0688	ok	1860.73	18.2852	9.1426	1850.07	15.9181	0.332668	0.00865822	0.096781	0.0179218	0.113785	0.0101252		3.006	0.0260266	0.113785	0.0011521	0.986999		1851.3	16.029	1867.2	33.4635
HRD10-414m	JN01B0689	ok	1630.31	14.7142	7.35708	658.506	9.50279	0.112874	0.0148018	0.0270107	0.0172593	0.100335	0.00791674		8.85943	0.131136	0.100335	0.00079433	0.883906		689.418	10.2046	538.704	9.29765
HRD10-414m	JN01B0690	ok	1835.82	19.7258	9.86288	1445.73	23.4172	0.257784	0.016715	0.0245461	0.0239001	0.112229	0.01089		3.87921	0.0648409	0.112229	0.00122217	0.950842		1478.5	24.713	490.14	11.7144
HRD10-414m	JN01B0691	ok	1816.64	12.181	6.09052	1530.93	13.2445	0.273089	0.00889774	0.0919121	0.0145959	0.111048	0.00670906		3.66181	0.0325819	0.111048	0.00074503	0.958169		1556.46	13.849	1777.27	25.9408
HRD10-414m	JN01B0692	ok	1860.59	13.2546	6.62732	1323.42	12.7776	0.235726	0.00996229	0.0357692	0.0187601	0.113777	0.00733947		4.24221	0.0422622	0.113777	0.000835061	0.940353		1364.44	13.5929	710.345	13.3262
HRD10-414m	JN01B0693	ok	1751.49	14.7013	7.35064	1431.01	13.328	0.253541	0.00959435	0.0490848	0.0309206	0.107149	0.00803228		3.94414	0.0378415	0.107149	0.000860654	0.948817		1456.71	13.9762	968.533	29.9476
HRD10-414m	JN01B0694	ok	1792.79	19.2045	9.60226	1451.7	18.2464	0.258077	0.0129445	0.0434055	0.022037	0.109601	0.0105465		3.87481	0.0501577	0.109601	0.00115591	0.950982		1480	19.1579	858.814	18.9257
HRD10-414m	JN01B0695	ok	1862.94	18.6588	9.32941	781.163	11.1482	0.136864	0.0146397	0.0519886	0.0210069	0.113924	0.0103348		7.30653	0.106965	0.113924	0.00117739	0.894633		826.904	12.1056	1024.4	21.5195
HRD10-414m	JN01B0696	ok	1810.65	12.7051	6.35254	1656.54	14.6675	0.296052	0.00906618	0.0736866	0.0152006	0.110682	0.00699255		3.37779	0.0306236	0.110682	0.000773952	0.96923		1671.7	15.1559	1437.05	21.844
HRD10-414m	JN01B0697	ok	1815.91	18.9623	9.48114	605.324	14.8183	0.104971	0.0250876	0.0315427	0.0202964	0.111003	0.0104431		9.52646	0.238996	0.111003	0.00115922	0.880406		643.474	16.1433	627.699	12.74
HRD10-414m	JN01B0698	ok	1870.68	19.6871	9.84356	1783.98	20.6982	0.320788	0.0117736	0.088405	0.0159469	0.114414	0.0109146		3.11733	0.0367021	0.114414	0.00124878	0.98122		1793.57	21.1168	1712.24	27.3051
HRD10-414m	JN01B0699	ok	1766.64	19.0234	9.51168	1167.24	13.0865	0.205589	0.0115536	0.070476	0.0168955	0.108041	0.0104133		4.86407	0.0561972	0.108041	0.00112506	0.926178		1205.28	13.9252	1376.52	23.257
HRD10-414m	JN01B0700	ok	1823.48	15.0528	7.5264	1359.15	17.8136	0.241634	0.0135482	0.018475	0.0346573	0.111467	0.00829769		4.13849	0.0560691	0.111467	0.000924921	0.943154		1395.19	18.9023	370.013	12.8236
HRD10-414m	JN01B0701	ok	1718.61	10.3037	5.15185	526.654	5.42961	0.0903681	0.0105057	0.0670895	0.0147561	0.105246	0.00560646		11.0659	0.116255	0.105246	0.000590056	0.873985		557.714	5.85919	1312.48	19.367
HRD10-414m	JN01B0702	ok	1841.1	17.8041	8.90203	1138.97	28.7028	0.201553	0.0261277	0.0158352	0.0338304	0.112557	0.00983537		4.96148	0.129632	0.112557	0.00110704	0.924294		1183.66	30.9263	317.556	10.743
HRD10-414m	JN01B0703	ok	1812.67	17.6388	8.81941	1643.71	18.4695	0.293738	0.0115005	0.0371493	0.0283969	0.110806	0.00971035		3.40439	0.0391523	0.110806	0.00107596	0.968113		1660.18	19.0929	737.258	20.9359
HRD10-414m	JN01B0704	ok	1874.22	18.581	9.29048	1769.09	19.0023	0.318135	0.0109057	0.0705199	0.0214553	0.114639	0.0103057		3.14332	0.0342802	0.114639	0.00118144	0.979931		1780.61	19.4189	1377.35	29.5514
HRD10-414m	JN01B0705	ok	1836.47	9.4916	4.7458	1610.47	20.2849	0.288123	0.0129673	0.0559295	0.0183583	0.112269	0.00524042		3.47074	0.045006	0.112269	0.000588337	0.965403		1632.14	21.1644	1099.98	20.1937
HRD10-414m	JN01B0706	ok	1815.78	11.7186	5.85932	1735.01	15.5091	0.310558	0.00912595	0.0574296	0.0168104	0.110996	0.0064537		3.22001	0.0293857	0.110996	0.000716332	0.976253		1743.45	15.9107	1128.67	18.9735
HRD10-414m	JN01B0707	ok	1832.78	9.34362	4.67181	1745.35	13.4488	0.31283	0.0078664	0.0915334	0.0138889	0.112041	0.00515641		3.19663	0.025146	0.112041	0.000577729	0.977355		1754.62	13.8025	1770.26	24.587
HRD10-414m	JN01B0711	ok	1946.29	15.3878	7.69392	534.448	18.7614	0.0934388	0.0359306	0.0349975	0.0175228	0.119335	0.00860823		10.7022	0.384536	0.119335	0.00102726	0.87533		575.843	20.6904	695.281	12.1833
HRD10-414m	JN01B0712	ok	1826.45	17.5738	8.78691	1977.28	19.5791	0.358967	0.00979329	0.106071	0.0148564	0.11165	0.00969088		2.78577	0.0272819	0.11165	0.00108199	0.999825		1977.28	19.364	2037.68	30.2726
HRD10-414m	JN01B0713	ok	1833.41	13.2449	6.62247	1759.79	17.9173	0.315494	0.0103802	0.0633699	0.0196778	0.11208	0.00730996		3.16963	0.0329014	0.11208	0.000819298	0.978648		1767.68	18.3489	1241.9	24.4379
HRD10-414m	JN01B0714	ok	1803.94	16.4697	8.23483	1434.13	18.0733	0.255055	0.0130018	0.0555123	0.0229471	0.110274	0.00905702		3.92072	0.0509765	0.110274	0.000998758	0.94954		1464.49	19.0411	1091.99	25.0581
HRD10-414m	JN01B0715	ok	1837.85	11.0391	5.51953	1792.12	17.2099	0.321519	0.00978062	0.0472245	0.0170533	0.112355	0.00609581		3.11023	0.03042	0.112355	0.000684892	0.981575		1797.14	17.5772	932.659	15.9049
HRD10-414m	JN01B0716	ok	1604.38	12.3675	6.18374	471.251	5.30385	0.0800212	0.0114531	0.0141492	0.0162654	0.0989477	0.00663185		12.4967	0.143126	0.0989477	0.000656206	0.869472		496.249	5.6836	283.982	4.61908
HRD10-414m	JN01B0717	ok	1825.44	16.45	8.22498	1482.8	17.3489	0.264408	0.0120488	0.0306148	0.022173	0.111588	0.00907003		3.78203	0.045569	0.111588	0.00101211	0.954009		1512.35	18.2221	609.511	13.5147
HRD10-414m	JN01B0718	ok	1835.38	13.8278	6.91392	1758.53	23.8085	0.315307	0.0138261	0.0850593	0.01739	0.112202	0.0076335		3.17151	0.0438495	0.112202	0.000856493	0.978558		1766.77	24.4275	1650.02	28.6939
HRD10-414m	JN01B0719	ok	1746.54	11.7874	5.89372	1202.04	12.5746	0.211629	0.0108248	0.059028	0.0157685	0.10686	0.00643627		4.72525	0.0511499	0.10686	0.000687779	0.929004		1237.49	13.3956	1159.2	18.2789
HRD10-414m	JN01B0720	ok	1808.4	12.7942	6.39708	1528.86	20.2013	0.272547	0.0136281	0.0735989	0.0198875	0.110546	0.00703964		3.66909	0.0500027	0.110546	0.000778202	0.95791		1553.72	21.1742	1435.4	28.5466
HRD10-414m	JN01B0721	ok	1866.68	18.8257	9.41283	1394.1	25.858	0.248856	0.0191784	0.0792714	0.0175892	0.114161	0.010432		4.01838	0.0770661	0.114161	0.00119092	0.946586		1432.58	27.4745	1541.91	27.1211
HRD10-414m	JN01B0722	ok	1862.47	14.7789	7.38945	1476	14.3827	0.263876	0.0100233	0.0297946	0.0380719	0.113895	0.00818536		3.78966	0.0379847	0.113895	0.000932272	0.953754		1509.64	15.1315	593.419	22.5926
HRD10-414m	JN01B0723	ok	1674.45	13.884	6.942	733.268	9.956	0.126439	0.0139545	0.0608274	0.0173441	0.102754	0.00751245		7.90893	0.110365	0.102754	0.000771932	0.889952		767.521	10.7103	1193.52	20.7005
HRD10-414m	JN01B0724	ok	1742.68	13.7338	6.86688	1306.15	13.4627	0.230559	0.0106515	0.0732145	0.0259421	0.106635	0.0074954		4.33729	0.0461985	0.106635	0.000799273	0.937909		1337.43	14.2455	1428.16	37.0496
HRD10-414m	JN01B0725	ok	1694.95	18.3493	9.17466	573.014	9.66881	0.0983356	0.0172471	0.0193492	0.0175555	0.103901	0.00995448		10.1693	0.17539	0.103901	0.00103428	0.877481		604.647	10.4284	387.356	6.80023
HRD10-414m	JN01B0726	ok	1850.95	9.12949	4.56475	1854.92	14.432	0.333417	0.00788767	0.0970272	0.0142587	0.113171	0.00504937		2.99925	0.0236571	0.113171	0.000571443	0.987364		1854.92	14.631	1871.73	26.6885
SSD11-380.2m	MA10D776	ok	1848.67	10.1291	5.06456	1867.67	19.853	0.336056	0.0107677	0.0989187	0.0148819	0.113028	0.0056007		2.9757	0.0320415	0.113028	0.000633038	0.988649		1867.67	20.1105	1906.55	28.3732
SSD11-380.2m	MA10D777	ok	1856.33	12.7474	6.37369	1881.55	19.1661	0.338937	0.010286	0.0946175	0.0163445	0.113509	0.00705496		2.9504	0.030348	0.113509	0.000800799	0.990053		1881.55	19.3537	1827.29	29.8661
SSD11-380.2m	MA10D778	ok	1831.48	12.8204	6.41022	1879.63	18.4695	0.338538	0.00990558	0.0942622	0.0160588	0.11196	0.00707401		2.95388	0.0292599	0.11196	0.000792009	0.989858		1879.63	18.6188	1820.73	29.2387
SSD11-380.2m	MA10D779	ok	1833.1	11.1819	5.59095	862.823	9.16576	0.151247	0.0109345	0.0632646	0.0156007	0.11206	0.00617112		6.6117	0.0722959	0.11206	0.000691537	0.901138		907.95	9.92801	1239.9	19.3433
SSD11-380.2m	MA10D780	ok	1851.44	9.86016	4.93008	1872.2	21.5035	0.336996	0.0116342	0.09762	0.0157847	0.113202	0.00545381		2.9674	0.0345233	0.113202	0.000617382	0.989107		1872.2	21.7816	1882.65	29.7172
SSD11-380.2m	MA10D781	ok	1858.23	8.27989	4.13994	1897.01	17.9709	0.342152	0.00956463	0.0965987	0.0145054	0.113628	0.0045835		2.92268	0.0279543	0.113628	0.000520814	0.99162		1897.01	18.1442	1863.84	27.0357
SSD11-380.2m	MA10D782	ok	1854.51	11.3044	5.65218	1859.31	18.9012	0.334324	0.0103056	0.0948654	0.0158658	0.113394	0.00625494		2.99111	0.0308252	0.113394	0.000709274	0.987805		1859.31	19.1613	1831.86	29.0639
SSD11-380.2m	MA10D783	ok	1854.13	11.2523	5.62617	1871.86	18.7928	0.336926	0.0101587	0.0955825	0.0152137	0.11337	0.00622588		2.96801	0.0301511	0.11337	0.00070583	0.989073		1871.86	19.0156	1845.1	28.0708
SSD11-380.2m	MA10D784	ok	1883.6	13.5798	6.7899	1829.31	19.2248	0.329416	0.0106666	0.0897719	0.0182088	0.115238	0.00754038		3.03568	0.0323805	0.115238	0.000868935	0.985416		1835.55	19.5792	1737.61	31.6399
SSD11-380.2m	MA10D785	ok	1855.16	11.3272	5.66361	1873.49	18.9933	0.337263	0.0102566	0.0954531	0.0152385	0.113435	0.00626809		2.96505	0.0304113	0.113435	0.00071102	0.989237		1873.49	19.2156	1842.71	28.0802
SSD11-380.2m	MA10D786	ok	1860.47	8.9261	4.46305	1952.67	21.3	0.35379	0.0109228	0.100006	0.0154262	0.113769	0.00494256		2.82654	0.0308738	0.113769	0.000562309	0.997298		1952.67	21.3287	1926.53	29.7191
SSD11-380.2m	MA10D787	ok	1824.96	9.21326	4.60663	1330.02	24.4465	0.23631	0.0190608	0.0812423	0.0180443	0.111559	0.00507962		4.23173	0.0806601	0.111559	0.000566675	0.94063		1367.49	26.0653	1578.79	28.4881
SSD11-380.2m	MA10D791	ok	1827.05	13.8731	6.93656	1734.06	25.5664	0.310632	0.0150828	0.0874246	0.0201268	0.111687	0.00765073		3.21924	0.0485553	0.111687	0.00085449	0.976289		1743.82	26.3017	1694.03	34.0954
SSD11-380.2m	MA10D792	ok	1846.07	8.96991	4.48495	1899.73	18.1132	0.342717	0.00961173	0.0967744	0.014697	0.112866	0.00495817		2.91786	0.0280457	0.112866	0.000559609	0.991895		1899.73	18.2597	1867.07	27.4403
SSD11-380.2m	MA10D793	ok	1857.33	11.8592	5.92961	1865.3	18.7874	0.335566	0.0101999	0.0958711	0.01549	0.113571	0.0065642		2.98004	0.0303961	0.113571	0.000745506	0.98841		1865.3	19.0259	1850.42	28.6631
SSD11-380.2m	MA10D794	ok	1612.42	13.5831	6.79153	955.297	36.2913	0.165356	0.0393568	0.0516437	0.0263506	0.0993753	0.00729128		6.04754	0.238012	0.0993753	0.000724573	0.90757		986.475	38.8245	1017.77	26.8189
SSD11-380.2m	MA10D795	ok	1952.66	10.1452	5.07258	2074.28	24.4422	0.37957	0.0116245	0.118861	0.0156744	0.119761	0.00567964		2.63456	0.0306254	0.119761	0.000680201	1.00989		2074.28	24.1124	2270.07	35.5819
SSD11-399.7m	MA10D796	ok	2097	10.3234	5.16171	1869.57	19.837	0.342534	0.010752	0.135297	0.0171199	0.129929	0.00587627		2.91942	0.0313897	0.129929	0.000763496	0.991806		1898.85	20.4164	2564.82	43.9095
SSD11-399.7m	MA10D797	ok	1728.72	9.02263	4.51131	1046.97	16.2532	0.183228	0.0160886	0.0610106	0.0161713	0.105827	0.00491564		5.45767	0.0878064	0.105827	0.000520205	0.915789		1084.59	17.4495	1197.01	19.3572
SSD11-399.7m	MA10D798	ok	1747.02	10.8068	5.40338	1224.64	14.7475	0.215755	0.0124768	0.0829692	0.0168007	0.106888	0.00590115		4.63489	0.0578287	0.106888	0.000630765	0.930938		1259.4	15.7133	1611.05	27.0667
SSD11-399.7m	MA10D799	ok	1865.35	12.8079	6.40394	1906.55	20.4168	0.344138	0.0107835	0.0960358	0.0164589	0.114077	0.00709616		2.90581	0.0313349	0.114077	0.000809508	0.992589		1906.55	20.5593	1853.46	30.5058
SSD11-399.7m	MA10D800	ok	1880.83	10.9964	5.49822	1831.49	23.3524	0.329749	0.012971	0.0958884	0.015765	0.11506	0.00610389		3.03261	0.0393359	0.11506	0.000702317	0.985578		1837.16	23.8298	1850.74	29.1769
SSD11-399.7m	MA10D801	ok	1852.86	10.563	5.2815	1787.34	18.7066	0.320989	0.0106703	0.0955028	0.0153109	0.113291	0.00584356		3.11537	0.033242	0.113291	0.00066202	0.981318		1794.56	19.1485	1843.63	28.2276
SSD11-399.7m	MA10D802	ok	1859.13	11.2222	5.61111	1917.73	19.2746	0.346472	0.0101041	0.100222	0.015293	0.113685	0.00621297		2.88623	0.0291628	0.113685	0.000706321	0.993727		1917.73	19.377	1930.51	29.5233
SSD11-399.7m	MA10D803	ok	1859.56	8.8309	4.41545	1917.3	18.1147	0.346382	0.00950805	0.101955	0.0158999	0.113712	0.00488931		2.88699	0.0274496	0.113712	0.000555972	0.993683		1917.3	18.2298	1962.33	31.2009
SSD11-399.7m	MA10D804	ok	1864.55	9.76887	4.88444	1698.18	20.7837	0.304872	0.01255	0.091617	0.0149829	0.114026	0.00541189		3.28006	0.0411647	0.114026	0.000617097	0.973498		1715.42	21.5285	1771.8	26.5468
SSD11-399.7m	MA10D805	ok	1892.36	9.13096	4.56548	1060.57	15.3748	0.18799	0.0150148	0.0860357	0.0164867	0.115799	0.00507541		5.31943	0.0798704	0.115799	0.00058773	0.917992		1110.48	16.6736	1668.2	27.5031
SSD11-399.7m	MA10D806	ok	1882.21	12.5787	6.28935	1907.36	19.975	0.344308	0.0105561	0.101636	0.0166349	0.115148	0.00698333		2.90438	0.0306588	0.115148	0.00080412	0.992671		1907.36	20.1342	1956.48	32.5457
SSD11-399.7m	MA10D807	ok	1941.09	10.5052	5.25259	1952.48	21.4707	0.35375	0.0110675	0.101628	0.017109	0.118988	0.00587318		2.82685	0.0312861	0.118988	0.00069884	0.997278		1952.48	21.609	1956.32	33.4706
SSD11-399.7m	MA10D808	ok	1894.37	12.0915	6.04573	1130.08	13.8144	0.200758	0.012644	0.0861769	0.0174636	0.115929	0.00672262		4.98111	0.0629813	0.115929	0.00077935	0.923924		1179.39	14.9123	1670.83	29.1786
SSD11-399.7m	MA10D809	ok	1851.08	11.1577	5.57887	1862.58	20.904	0.335002	0.0113766	0.0969069	0.0160353	0.113179	0.00617126		2.98506	0.0339599	0.113179	0.000698459	0.988136		1862.58	21.1899	1869.52	29.9782
SSD11-399.7m	MA10D810	ok	2022.37	16.403	8.20148	1914.54	19.2869	0.348709	0.010121	0.112193	0.0203224	0.124547	0.00925779		2.86772	0.0290243	0.124547	0.00115303	0.994818		1928.43	19.5178	2149.23	43.6777
SSD11-399.7m	MA10D811	ok	1947.05	10.4465	5.22326	1972.38	20.163	0.357935	0.0102556	0.109488	0.0156497	0.119386	0.00584449		2.7938	0.028652	0.119386	0.00069775	0.999321		1972.38	20.2279	2100.03	32.865
SSD11-399.7m	MA10D812	ok	1851.16	11.7005	5.85026	1894.82	18.9152	0.341695	0.0100619	0.0950677	0.0155763	0.113184	0.00647152		2.92658	0.029447	0.113184	0.000732473	0.991398		1894.82	19.0655	1835.6	28.5918
Stds
91500	AP28A0003	ok	1082.87	65.3737	32.6868	1059.27	10.5545	0.178778	0.0102336	0.0531411	0.0254856	0.0755387	0.0162977		5.59353	0.057242	0.0755387	0.00123111	0.913735		1060.29	10.8506	1046.53	26.6715
91500	AP28A0004	ok	985.887	81.7066	40.8533	1071	11.8204	0.180737	0.0112811	0.0539265	0.0239297	0.0719981	0.0200732		5.53291	0.062417	0.0719981	0.00144523	0.914639		1071	12.082	1061.6	25.4038
91500	AP28A0027	ok	1121.24	68.9232	34.4616	1057.85	10.3596	0.178842	0.0100358	0.0522461	0.022291	0.077002	0.0172809		5.59152	0.0561155	0.077002	0.00133066	0.913765		1060.65	10.6444	1029.35	22.9452
91500	AP28A0062	ok	1088.63	69.6253	34.8126	1063.52	10.1949	0.17957	0.00982192	0.0532642	0.0230338	0.075756	0.0173726		5.56886	0.0546968	0.075756	0.00131608	0.9141		1064.63	10.4567	1048.9	24.1601
91500	AP28A0097	ok	988.287	78.8724	39.4362	1069.53	12.6979	0.180468	0.0121639	0.0546254	0.0290439	0.0720831	0.019384		5.54115	0.067402	0.0720831	0.00139726	0.914515		1069.53	13.0097	1075	31.2222
91500	AP28A0147	ok	1107.05	68.2768	34.1384	1060.67	10.709	0.179219	0.0103593	0.0545134	0.0229996	0.0764565	0.0170828		5.57976	0.0578024	0.0764565	0.00130609	0.913939		1062.71	11.0089	1072.85	24.6752
91500	AP28A0185	no comm	1027.95	73.352	36.676	1067.8	11.1335	0.180152	0.0106834	0.0563086	0.0232179	0.0735066	0.0181364		5.55088	0.059302	0.0735066	0.00133314	0.914369		1067.8	11.4077	1107.23	25.7077
91500	AP28A0231	ok	1108.06	63.027	31.5135	1055.94	10.582	0.178398	0.0102974	0.0570748	0.0246129	0.0764954	0.0157717		5.60543	0.0577214	0.0764954	0.00120646	0.91356		1058.22	10.8969	1121.89	27.6129
91500	AP28A0274	ok	1096.05	63.202	31.601	1051.48	9.75825	0.17752	0.00952117	0.0531367	0.0250921	0.0760372	0.0157873		5.63316	0.0536343	0.0760372	0.00120042	0.913156		1053.41	10.0297	1046.45	26.2576
91500	AP28A0316	ok	1055.64	70.0011	35.0005	1068.24	10.4058	0.180232	0.00998389	0.054421	0.0225131	0.0745221	0.0173803		5.5484	0.0553946	0.0745221	0.00129522	0.914406		1068.24	10.6652	1071.08	24.1133
91500	AP28A0362	ok	1061.23	72.3647	36.1824	1059.88	10.7272	0.178712	0.0103787	0.0511606	0.024005	0.0747293	0.0179823		5.5956	0.058075	0.0747293	0.0013438	0.913705		1059.93	11.0007	1008.49	24.2088
91500	AP28A0405	ok	1091.76	62.9265	31.4632	1068.26	10.1682	0.180426	0.00977421	0.0553365	0.0239217	0.0758744	0.0157084		5.54244	0.054173	0.0758744	0.00119187	0.914495		1069.3	10.4516	1088.62	26.0417
91500	AP28A0438	ok	1070.25	67.0433	33.5217	1066.73	10.2379	0.179983	0.00984641	0.0539163	0.0227231	0.0750653	0.0166825		5.55607	0.0547074	0.0750653	0.00125227	0.914291		1066.88	10.505	1061.41	24.1185
91500	AP28A0461	ok	1111.09	64.0355	32.0177	1067.66	10.673	0.180478	0.0102691	0.055628	0.0233166	0.0766115	0.0160313		5.54085	0.0568994	0.0766115	0.00122818	0.914519		1069.58	10.9837	1094.21	25.5132
91500	AP28A0492	ok	994.342	76.3914	38.1957	1058.16	10.1669	0.178387	0.0098096	0.0516996	0.0248074	0.072298	0.0187917		5.6058	0.0549906	0.072298	0.0013586	0.913555		1058.16	10.3801	1018.85	25.275
91500	AP28A0493	ok	1073.7	68.9712	34.4856	1053.34	10.8472	0.177667	0.0105726	0.0537377	0.0237097	0.0751942	0.0171711		5.62849	0.059508	0.0751942	0.00129116	0.913223		1054.22	11.1459	1057.98	25.0844
91500	DE04A0003	ok	1102.85	48.5525	24.2762	1053.04	15.4118	0.177849	0.0150224	0.0515438	0.0319793	0.0762962	0.0242805		5.62274	0.0844672	0.0762962	0.00185251	0.913307		1055.21	15.8519	1015.85	32.4863
91500	DE04A0004	ok	1055.64	48.2175	24.1087	1071.01	15.3194	0.180738	0.0146799	0.0537919	0.0335384	0.0745219	0.0239435		5.53286	0.0812217	0.0745219	0.00178431	0.914639		1071.01	15.7223	1059.02	35.5179
91500	DE04A0028	ok	992.653	53.174	26.587	1063.21	16.2332	0.17931	0.015634	0.0561618	0.0385068	0.072238	0.026154		5.57692	0.0871894	0.072238	0.00188931	0.913981		1063.21	16.6221	1104.43	42.5279
91500	DE04A0029	ok	961.61	59.0828	29.5414	1067.91	16.4287	0.180171	0.0157023	0.0533651	0.036826	0.071146	0.0289223		5.55028	0.0871524	0.071146	0.00205771	0.914378		1067.91	16.7687	1050.83	38.6978
91500	DE04A0053	ok	1062.31	47.8918	23.9459	1076.45	17.6759	0.181735	0.0168974	0.0556144	0.038789	0.0747694	0.0238056		5.50252	0.0929782	0.0747694	0.00177993	0.915099		1076.45	18.1891	1093.95	42.433
91500	DE04A0054	ok	1021.38	56.8456	28.4228	1055.3	13.9675	0.177865	0.0134916	0.0517088	0.0453802	0.0732682	0.0280824		5.62223	0.0758527	0.0732682	0.00205755	0.913315		1055.3	14.2377	1019.02	46.2435
91500	DE04A0061	ok	1110.46	52.815	26.4075	1064.45	16.0636	0.17991	0.0154713	0.0525248	0.0338265	0.076587	0.0264419		5.55833	0.0859944	0.076587	0.00202511	0.914257		1066.48	16.4999	1034.7	35.0003
91500	DE04A0062	ok	999.487	53.434	26.717	1066.94	15.6049	0.179993	0.0149617	0.0553108	0.0421713	0.0724813	0.0263093		5.55577	0.0831237	0.0724813	0.00190693	0.914295		1066.94	15.9632	1088.13	45.8879
91500	DE07C154	ok	1028.83	30.4185	15.2092	1069.89	10.2334	0.180534	0.00981976	0.0544626	0.0221947	0.0735384	0.015044		5.53912	0.0543929	0.0735384	0.00110631	0.914545		1069.89	10.5061	1071.88	23.79
91500	DE07C155	ok	1049.59	32.9599	16.4799	1057.06	10.3122	0.178186	0.0100145	0.0542164	0.020529	0.0742986	0.0163521		5.61212	0.0562026	0.0742986	0.00121494	0.913462		1057.06	10.5859	1067.16	21.9077
91500	DE07C176	ok	1072.01	28.8579	14.429	1065.16	11.0082	0.179723	0.0106463	0.0522174	0.0201261	0.0751311	0.0143653		5.56412	0.0592375	0.0751311	0.00107928	0.914171		1065.46	11.3432	1028.8	20.7057
91500	DE07C198	ok	1156.3	31.591	15.7955	1063.12	10.4091	0.180061	0.0100492	0.057176	0.021036	0.0783714	0.0159233		5.55366	0.0558098	0.0783714	0.00124793	0.914327		1067.31	10.7256	1123.83	23.6408
91500	DE07C199	ok	1056.1	31.5627	15.7814	1061.41	11.5491	0.178982	0.0112012	0.0520532	0.0208458	0.0745391	0.0156743		5.58715	0.0625829	0.0745391	0.00116834	0.913829		1061.41	11.8891	1025.64	21.3803
91500	OC31A0003	ok	1106.3	54.8375	27.4187	1052.05	16.6997	0.177702	0.0162772	0.0523054	0.0366179	0.0764278	0.0274376		5.62738	0.0915983	0.0764278	0.00209699	0.91324		1054.41	17.1629	1030.49	37.7344
91500	OC31A0004	ok	1159.83	49.7867	24.8933	1056.58	16.3393	0.178941	0.0158708	0.0493878	0.0357715	0.078511	0.0251078		5.58843	0.0886928	0.078511	0.00197124	0.91381		1061.19	16.8419	974.369	34.8547
91500	OC31A0024	ok	1131.48	47.4526	23.7263	1070.49	16.2621	0.181145	0.0156093	0.0499399	0.0369861	0.0773988	0.0238312		5.52044	0.0861701	0.0773988	0.00184451	0.914827		1073.23	16.7523	985.001	36.4313
91500	OC31A0025	ok	1150.7	49.0995	24.5498	1058.15	15.2156	0.179141	0.0147395	0.0503759	0.0299432	0.0781503	0.0247281		5.5822	0.0822791	0.0781503	0.00193251	0.913902		1062.28	15.6575	993.393	29.7453
91500	OC31A0059	ok	1028.17	51.7906	25.8953	1065.78	16.846	0.179781	0.0162203	0.0518324	0.0337247	0.0735146	0.0256115		5.56232	0.0902227	0.0735146	0.00188282	0.914198		1065.78	17.2873	1021.4	34.4464
91500	OC31A0060	ok	1097.42	44.3097	22.1548	1050.29	14.3616	0.177323	0.0140431	0.0513729	0.0304626	0.0760891	0.0221408		5.63944	0.0791953	0.0760891	0.00168468	0.913065		1052.33	14.778	1012.57	30.8455
91500	OC31A0099	ok	1065.46	38.9712	19.4856	1067.38	16.0702	0.180074	0.0155254	0.055416	0.0310737	0.0748868	0.0193806		5.55328	0.0862168	0.0748868	0.00145135	0.914333		1067.38	16.5715	1090.15	33.875
91500	OC31A0100	ok	1109.25	46.2988	23.1494	1057.73	15.5686	0.178722	0.0151242	0.0563447	0.0365118	0.0765409	0.0231755		5.59527	0.0846239	0.0765409	0.00177387	0.91371		1059.99	16.0315	1107.92	40.4523
91500	OC31A0139	ok	1054.42	41.7396	20.8698	1066.66	16.2414	0.179943	0.0156838	0.0522053	0.0340619	0.0744769	0.020723		5.55733	0.0871602	0.0744769	0.00154338	0.914272		1066.66	16.7293	1028.57	35.0349
91500	OC31A0140	ok	1158.41	45.3185	22.6592	1059.6	17.5349	0.17946	0.0170363	0.0529339	0.0345651	0.0784547	0.0228497		5.57226	0.0949305	0.0784547	0.00179266	0.91405		1064.03	18.127	1042.56	36.0361
91500	AP19C391	ok	1066.96	49.9707	24.9853	1065.5	9.48666	0.179742	0.00917166	0.0552745	0.0190676	0.0749423	0.0124281		5.56352	0.0510267	0.0749423	0.000931393	0.91418		1065.57	9.77302	1087.44	20.7348
91500	AP19C392	ok	1062.24	55.6808	27.8404	1066.86	9.46167	0.179979	0.0091178	0.0535259	0.0221992	0.0747669	0.0138385		5.55619	0.0506603	0.0747669	0.00103466	0.914289		1066.86	9.72744	1053.92	23.3961
91500	AP19C416	ok	1089.01	56.0582	28.0291	1053.21	9.15392	0.177767	0.00892829	0.0540641	0.0204177	0.0757705	0.0139882		5.62534	0.0502247	0.0757705	0.00105989	0.913269		1054.76	9.41725	1064.24	21.7293
91500	AP19C446	ok	1121.95	64.5203	32.2602	1057.18	9.34029	0.178731	0.00904512	0.0540005	0.0223227	0.0770295	0.0161786		5.59501	0.0506075	0.0770295	0.00124623	0.913713		1060.04	9.58817	1063.02	23.7294
91500	AP19C449	ok	1097.58	51.7251	25.8625	1060.35	9.40414	0.179087	0.00912713	0.054106	0.0238914	0.0760953	0.0129234		5.58389	0.0509648	0.0760953	0.00098341	0.913878		1061.98	9.69286	1065.04	25.4454
91500	AP19C476	ok	1079.33	65.3785	32.6893	1069.52	8.88069	0.180545	0.008491	0.051972	0.0216747	0.0754055	0.0162903		5.53877	0.0470297	0.0754055	0.00122838	0.91455		1069.95	9.08498	1024.08	22.1967
91500	AP19C507	ok	1119.8	49.5654	24.7827	1056.18	9.37237	0.178537	0.00913591	0.0529182	0.0216741	0.0769466	0.0124247		5.60108	0.051171	0.0769466	0.000956038	0.913624		1058.98	9.67471	1042.25	22.5899
91500	AP19C533	ok	1095.27	61.7137	30.8568	1061.06	8.91099	0.179193	0.00860104	0.0538253	0.0211962	0.0760076	0.0154137		5.58058	0.0479988	0.0760076	0.00117156	0.913926		1062.56	9.13914	1059.66	22.4608
91500	AP19C566	ok	1024.5	56.1372	28.0686	1060.11	9.42924	0.178745	0.00913455	0.0536292	0.023205	0.0733812	0.0138728		5.59458	0.0511039	0.0733812	0.001018	0.91372		1060.11	9.68365	1055.9	24.5022
91500	AP19C597	ok	1081.12	61.8094	30.9047	1070.53	9.33314	0.180736	0.00894011	0.0543081	0.0202167	0.0754727	0.0154051		5.53293	0.0494651	0.0754727	0.00116267	0.914638		1070.99	9.5748	1068.92	21.61
91500	AP19C625	ok	1060.18	60.0792	30.0396	1069.7	9.36375	0.180499	0.00898204	0.0529401	0.0199196	0.0746902	0.014927		5.54021	0.0497624	0.0746902	0.0011149	0.914529		1069.7	9.60808	1042.67	20.7697
91500	AP19C658	ok	1101.84	50.4057	25.2029	1068.51	8.4863	0.180552	0.00816122	0.0567975	0.0212284	0.0762574	0.0126017		5.53857	0.0452015	0.0762574	0.000960976	0.914553		1069.99	8.73243	1116.59	23.7034
91500	AP19C688	ok	1093.16	55.8388	27.9194	1055.38	9.2208	0.17818	0.00897639	0.0535701	0.019677	0.0759274	0.013942		5.61229	0.0503781	0.0759274	0.00105858	0.91346		1057.03	9.48829	1054.76	20.7546
91500	AP19C691	ok	1063.72	53.8814	26.9407	1066.69	8.90125	0.179948	0.00857509	0.0544264	0.0192676	0.0748217	0.0133942		5.55718	0.0476533	0.0748217	0.00100218	0.914274		1066.69	9.14694	1071.19	20.6392
91500	AP19C721	ok	1084.24	42.4955	21.2478	1067.08	8.27482	0.180158	0.00798976	0.0543766	0.0191032	0.0755904	0.0105964		5.55069	0.0443487	0.0755904	0.000800982	0.914371		1067.84	8.53176	1070.23	20.4449
91500	AP19C754	ok	1077.24	42.26	21.13	1055.18	7.71261	0.178017	0.00752444	0.054688	0.0181024	0.0753268	0.0105266		5.61745	0.0422681	0.0753268	0.000792935	0.913384		1056.13	7.9468	1076.2	19.4818
91500	AP19C787	ok	1075.05	43.8398	21.9199	1067.11	7.71369	0.180089	0.0074366	0.0548062	0.0176541	0.075245	0.0109166		5.55281	0.041294	0.075245	0.000821416	0.91434		1067.46	7.93828	1078.47	19.0394
91500	AP19C819	ok	1068.99	46.9535	23.4767	1054.62	8.4854	0.177854	0.00828221	0.0524672	0.0220035	0.0750184	0.0116813		5.62259	0.0465675	0.0750184	0.000876311	0.913309		1055.24	8.73972	1033.6	22.7428
91500	AP19C852	ok	1059.4	43.6299	21.815	1055.08	8.61217	0.177858	0.00841383	0.0536254	0.0209188	0.0746615	0.0108388		5.62245	0.0473064	0.0746615	0.000809244	0.913311		1055.26	8.87882	1055.83	22.0866
91500	AP19C884	ok	1059.31	53.073	26.5365	1071.78	8.86384	0.18088	0.0084968	0.0534944	0.0191014	0.074658	0.0131846		5.52853	0.0469747	0.074658	0.000984332	0.914705		1071.78	9.1067	1053.31	20.1197
91500	AP19C916	ok	1054.36	44.4862	22.2431	1059.72	8.2222	0.178674	0.00798861	0.0531964	0.0194579	0.0744748	0.0110432		5.5968	0.0447106	0.0744748	0.00082244	0.913687		1059.72	8.46572	1047.59	20.384
91500	AP19C946	ok	1081.65	47.5746	23.7873	1051.47	8.18286	0.177402	0.00800314	0.0538122	0.0175632	0.0754926	0.0118582		5.6369	0.0451129	0.0754926	0.000895209	0.913101		1052.77	8.42545	1059.41	18.6066
91500	AP19C973	ok	1056.57	50.2822	25.1411	1062.68	8.37551	0.179215	0.00810011	0.0536631	0.0185669	0.0745565	0.0124861		5.57989	0.0451978	0.0745565	0.000930922	0.913937		1062.68	8.60786	1056.55	19.6168
91500	AP19C1009	ok	1098.28	49.0849	24.5424	1066.33	8.35501	0.18014	0.00805366	0.054256	0.0190123	0.0761218	0.012265		5.55124	0.0447078	0.0761218	0.000933637	0.914363		1067.74	8.5992	1067.92	20.3036
91500	AP19C1010	ok	1092.8	46.7051	23.3525	1068.55	8.2185	0.180485	0.00791086	0.0533244	0.0202896	0.075914	0.0116609		5.54063	0.0438311	0.075914	0.000885225	0.914522		1069.62	8.46164	1050.05	21.3051
91500	JN01B0446	ok	1057.48	30.7235	15.3617	1058.51	10.6102	0.178452	0.010311	0.0543061	0.0260954	0.0745901	0.0152607		5.60376	0.0577802	0.0745901	0.00113829	0.913585		1058.51	10.9143	1068.88	27.8928
91500	JN01B0486	ok	1098.01	36.6826	18.3413	1069.76	10.9227	0.180739	0.0104637	0.0539114	0.0237919	0.0761116	0.0183313		5.53286	0.0578943	0.0761116	0.00139523	0.914639		1071.01	11.2067	1061.31	25.2506
91500	JN01B0523	ok	1023.83	37.9358	18.9679	1073.38	10.7933	0.181173	0.010283	0.0546883	0.0254331	0.0733571	0.0187477		5.5196	0.0567578	0.0733571	0.00137528	0.91484		1073.38	11.0375	1076.21	27.3713
91500	JN01B0560	ok	1092.7	34.9005	17.4502	1062.32	11.0683	0.179392	0.010695	0.0542549	0.026062	0.07591	0.017427		5.57438	0.0596178	0.07591	0.00132288	0.914018		1063.65	11.3757	1067.9	27.8316
91500	JN01B0597	ok	1001.15	33.3653	16.6827	1064.69	10.745	0.179583	0.0103466	0.0566856	0.0237881	0.0725406	0.0164322		5.56847	0.0576145	0.0725406	0.001192	0.914106		1064.69	11.0159	1114.45	26.5105
91500	JN01B0634	ok	1057.92	31.6388	15.8194	1067.08	10.3776	0.180019	0.00999016	0.0531128	0.0214718	0.0746065	0.0157163		5.55496	0.055495	0.0746065	0.00117254	0.914308		1067.08	10.6603	1045.99	22.4592
91500	JN01B0671	ok	1039.98	32.2815	16.1408	1052.41	10.63	0.177337	0.0103786	0.0535373	0.0229526	0.0739456	0.0159924		5.63899	0.0585245	0.0739456	0.00118257	0.913071		1052.41	10.9225	1054.14	24.1952
91500	JN01B0708	ok	1050.02	39.9187	19.9594	1067.31	11.373	0.180061	0.0109088	0.0532355	0.024252	0.0743143	0.0198058		5.55367	0.0605836	0.0743143	0.00147185	0.914327		1067.31	11.643	1048.35	25.4245
91500	JN01B0745	ok	1062.01	31.4724	15.7362	1064.66	9.91356	0.179576	0.00955974	0.0538708	0.0229935	0.0747583	0.0156433		5.56866	0.0532349	0.0747583	0.00116947	0.914103		1064.66	10.1779	1060.53	24.3854
91500	JN01B0782	ok	1010.9	32.2416	16.1208	1056.73	11.0094	0.178125	0.0106996	0.0523347	0.0296106	0.0728903	0.0159024		5.61402	0.060068	0.0728903	0.00115913	0.913434		1056.73	11.3066	1031.05	30.5301
91500	JN01B0819	ok	1020.5	32.7746	16.3873	1068.42	11.3402	0.180264	0.0109	0.0563532	0.023385	0.0732364	0.0161889		5.54742	0.0604671	0.0732364	0.00118561	0.91442		1068.42	11.6458	1108.09	25.9126
91500	JN01B0862	ok	1036.62	35.4289	17.7144	1065.55	10.9612	0.17974	0.0105485	0.0542755	0.025105	0.0738227	0.0175427		5.5636	0.0586876	0.0738227	0.00129505	0.914179		1065.55	11.24	1068.29	26.8195
91500	JN01B0865	ok	1032.24	35.2688	17.6344	1054.82	11.1785	0.177777	0.0108772	0.0536003	0.0240658	0.0736626	0.0174518		5.62503	0.0611847	0.0736626	0.00128555	0.913274		1054.82	11.4735	1055.34	25.3977
91500	JN01B0866	ok	1063.81	37.6094	18.8047	1066.87	11.3828	0.179981	0.0109434	0.052901	0.0286105	0.0748253	0.0186987		5.55616	0.0608031	0.0748253	0.00139914	0.91429		1066.87	11.6751	1041.93	29.81
NIST610	AP28A0001	ok	5104.8	9.38893	4.69447	44.3031	16.7345	0.22872	0.0101662	0.498979	0.0116043	0.910202	0.00332256		4.37217	0.0444482	0.910202	0.0030242	0.937041		1327.78	13.4985	8181.59	94.9413
NIST610	AP28A0002	ok	5109.23	8.87445	4.43722	39.2268	16.6964	0.228324	0.0102294	0.499955	0.0116263	0.913061	0.00314108		4.37975	0.0448024	0.913061	0.002868	0.936854		1325.71	13.5612	8194.74	95.2747
NIST610	AP28A0028	ok	5101.55	9.3396	4.6698	48.7471	16.7362	0.229754	0.00959852	0.49956	0.0118156	0.908108	0.00330465		4.35248	0.0417774	0.908108	0.00300097	0.937529		1333.21	12.7969	8189.42	96.7631
NIST610	AP28A0063	ok	5103.76	9.21064	4.60532	45.6803	16.7072	0.229004	0.0100659	0.502514	0.0116274	0.90953	0.00325932		4.36674	0.0439553	0.90953	0.00296445	0.937175		1329.28	13.3804	8229.21	95.6843
NIST610	AP28A0098	ok	5100.6	9.33876	4.66938	49.0737	16.6865	0.229053	0.0109047	0.498032	0.0117911	0.907499	0.00330422		4.36581	0.047608	0.907499	0.00299857	0.937198		1329.53	14.4982	8168.82	96.3196
NIST610	AP28A0148	ok	5106.88	9.57318	4.78659	41.8831	16.7814	0.228496	0.0104245	0.49617	0.0117967	0.911544	0.00338806		4.37644	0.0456223	0.911544	0.00308837	0.936936		1326.61	13.8293	8143.68	96.0684
NIST610	AP28A0186	no comm	5098.28	9.69738	4.84869	47.5564	16.4854	0.224933	0.0110336	0.487795	0.0117533	0.906014	0.00343077		4.44576	0.0490527	0.906014	0.00310832	0.935255		1307.89	14.4307	8030.23	94.3815
NIST610	AP28A0232	ok	5103.41	9.29193	4.64597	42.7729	16.5264	0.225527	0.0115405	0.492506	0.0117846	0.909303	0.00328804		4.43406	0.0511711	0.909303	0.00298982	0.935535		1311.01	15.1297	8094.12	95.3858
NIST610	AP28A0275	ok	5107.12	9.25768	4.62884	40.2615	16.655	0.227023	0.0113699	0.493837	0.0116278	0.911695	0.00327643		4.40484	0.0500824	0.911695	0.00298711	0.93624		1318.88	14.9954	8112.13	94.326
NIST610	AP28A0317	ok	5104.96	9.17814	4.58907	43.8937	16.6901	0.228467	0.0101803	0.491766	0.0117088	0.910306	0.00324799		4.377	0.0445591	0.910306	0.00295666	0.936922		1326.46	13.5037	8084.1	94.6548
NIST610	AP28A0363	ok	5099.58	8.97432	4.48716	48.0055	16.4945	0.226821	0.0105589	0.485965	0.0118392	0.906844	0.00317513		4.40875	0.0465516	0.906844	0.00287935	0.936145		1317.82	13.9147	8005.34	94.777
NIST610	AP28A0406	ok	5101.75	8.87727	4.43864	46.2978	16.5435	0.227426	0.0108128	0.488501	0.0116551	0.90824	0.00314109		4.39704	0.0475441	0.90824	0.00285286	0.936431		1320.99	14.2836	8039.81	93.7046
NIST610	AP28A0439	ok	5103.53	9.17055	4.58528	44.945	16.6418	0.227975	0.0101154	0.488661	0.0117059	0.909383	0.0032451		4.38645	0.0443705	0.909383	0.00295104	0.93669		1323.88	13.3915	8041.98	94.1387
NIST610	AP28A0460	ok	5103	9.52169	4.76085	44.3246	16.6215	0.226724	0.0109127	0.490364	0.0116418	0.90904	0.00336928		4.41066	0.048132	0.90904	0.00306281	0.936099		1317.3	14.3753	8065.09	93.8925
NIST610	AP28A0494	ok	5105.95	8.6302	4.3151	40.4108	16.4795	0.225859	0.0100301	0.485238	0.0115384	0.910943	0.00305421		4.42755	0.0444087	0.910943	0.00278221	0.935691		1312.76	13.1671	7995.46	92.2546
NIST610	AP28A0495	ok	5107.24	9.93026	4.96513	39.688	16.7373	0.226549	0.0105213	0.48469	0.0116171	0.911777	0.00351449		4.41407	0.0464416	0.911777	0.00320443	0.936017		1316.38	13.85	7988	92.7977
NIST610	DE04A0001	ok	5082.6	7.60652	3.80326	72.6339	17.8476	0.233499	0.0114129	0.502113	0.0163485	0.896021	0.00537852		4.28267	0.0488778	0.896021	0.00481926	0.939299		1352.81	15.4395	8223.81	134.447
NIST610	DE04A0002	ok	5097.91	7.64972	3.82486	54.5998	17.9979	0.231779	0.0116428	0.499797	0.0164686	0.905774	0.00541259		4.31445	0.0502325	0.905774	0.00490259	0.938486		1343.82	15.6458	8192.62	134.921
NIST610	DE04A0026	ok	5098.11	7.65387	3.82694	59.618	18.3082	0.236975	0.0121833	0.511393	0.0163884	0.905904	0.00541557		4.21986	0.0514117	0.905904	0.00490599	0.940945		1370.95	16.7027	8348.29	136.815
NIST610	DE04A0027	ok	5102.12	7.53488	3.76744	54.6349	18.2758	0.236356	0.0124665	0.512354	0.0164711	0.908475	0.00533229		4.2309	0.0527448	0.908475	0.00484425	0.940652		1367.73	17.0508	8361.14	137.718
NIST610	DE04A0063	ok	5096.89	7.30118	3.65059	61.2276	18.1342	0.237254	0.0119567	0.52186	0.0161415	0.905123	0.00516575		4.21489	0.0503962	0.905123	0.00467564	0.941077		1372.4	16.4094	8487.79	137.006
NIST610	DE04A0064	ok	5113.39	7.67556	3.83778	40.0829	18.3828	0.23402	0.0133005	0.511316	0.0164363	0.915753	0.00543443		4.27313	0.056835	0.915753	0.0049766	0.939546		1355.53	18.0293	8347.26	137.198
NIST610	DE07C152	ok	5101.52	4.87215	2.43607	48.6959	16.7996	0.229671	0.0118794	0.507674	0.0138048	0.90809	0.00344784		4.35406	0.0517234	0.90809	0.00313095	0.93749		1332.77	15.8325	8298.49	114.559
NIST610	DE07C153	ok	5106.57	5.00172	2.50086	41.1711	16.7881	0.227379	0.0124237	0.503548	0.0137541	0.911342	0.00354029		4.39794	0.0546386	0.911342	0.00322641	0.936409		1320.75	16.4086	8243.11	113.376
NIST610	DE07C177	ok	5104.09	5.25983	2.62991	46.935	17.0241	0.23068	0.0124651	0.491572	0.0137842	0.909742	0.00372259		4.335	0.0540363	0.909742	0.00338659	0.937967		1338.06	16.6791	8081.47	111.396
NIST610	DE07C200	ok	5103.18	5.01061	2.50531	49.0736	16.9909	0.231883	0.012356	0.481593	0.0137927	0.909155	0.00354607		4.31251	0.0532855	0.909155	0.00322393	0.938535		1344.36	16.611	7945.79	109.594
NIST610	DE07C232	ok	5099.32	4.82757	2.41378	53.2393	16.8785	0.23192	0.0128777	0.45821	0.0137682	0.906675	0.00341597		4.31184	0.0555267	0.906675	0.00309717	0.938553		1344.55	17.3148	7624.24	104.972
NIST610	DE07C233	ok	5109.42	5.22408	2.61204	42.5999	17.1672	0.232128	0.0119194	0.454568	0.0137703	0.91318	0.00369812		4.30797	0.0513483	0.91318	0.00337705	0.938651		1345.64	16.0392	7573.7	104.292
NIST610	OC31A0001	ok	5103.02	6.3887	3.19435	51.3961	17.642	0.234081	0.0152	0.48023	0.0181507	0.909054	0.00452133		4.27202	0.0649346	0.909054	0.00411013	0.939575		1355.85	20.609	7927.18	143.884
NIST610	OC31A0002	ok	5111.03	6.40088	3.20044	45.7004	17.9391	0.237182	0.0141194	0.479972	0.0190341	0.914223	0.00453149		4.21617	0.0595297	0.914223	0.00414279	0.941043		1372.03	19.3722	7923.67	150.819
NIST610	OC31A0026	ok	5105.1	6.98096	3.49048	46.5468	17.7767	0.231403	0.0148753	0.485734	0.0191326	0.910394	0.00494091		4.32147	0.0642833	0.910394	0.00449818	0.938308		1341.85	19.9604	8002.2	153.102
NIST610	OC31A0027	ok	5099.25	6.14888	3.07444	53.8481	17.3967	0.232464	0.0150733	0.485643	0.019476	0.906633	0.00435091		4.30175	0.0648417	0.906633	0.00394468	0.93881		1347.4	20.3098	8000.96	155.826
NIST610	OC31A0061	ok	5101.8	7.67292	3.83646	53.1997	18.2378	0.234579	0.0140068	0.498196	0.0182962	0.908274	0.0054299		4.26296	0.0597105	0.908274	0.00493184	0.93981		1358.45	19.0276	8171.03	149.499
NIST610	OC31A0062	ok	5104.7	7.00965	3.50483	49.5972	17.9383	0.234104	0.0136478	0.493883	0.0181072	0.910138	0.00496114		4.2716	0.058298	0.910138	0.00451532	0.939586		1355.97	18.5061	8112.77	146.9
NIST610	OC31A0101	ok	5100.61	7.21225	3.60612	54.9094	18.0212	0.234996	0.0132143	0.508942	0.0185133	0.907505	0.00510364		4.25539	0.0562318	0.907505	0.00463158	0.940008		1360.63	17.9797	8315.49	153.947
NIST610	OC31A0102	ok	5112.1	7.18864	3.59432	43.1259	18.2281	0.235731	0.0137672	0.5138	0.0186644	0.914914	0.00508941		4.24212	0.0584023	0.914914	0.00465637	0.940356		1364.47	18.7849	8380.46	156.416
NIST610	OC31A0141	ok	5108.84	6.645	3.3225	46.2248	17.9031	0.235253	0.0141188	0.528245	0.0188946	0.912807	0.00470388		4.25074	0.0600155	0.912807	0.00429373	0.940129		1361.97	19.2294	8572.41	161.972
NIST610	OC31A0142	ok	5094.44	6.62684	3.31342	63.189	17.7541	0.236576	0.013034	0.523388	0.0187594	0.903553	0.00468816		4.22698	0.0550944	0.903553	0.004236	0.940756		1368.87	17.8418	8508.07	159.606
NIST610	AP19C389	ok	5106.24	8.91266	4.45633	46.0287	16.8673	0.232137	0.010774	0.502877	0.0117322	0.911129	0.00315421		4.30779	0.046412	0.911129	0.00287389	0.938656		1345.69	14.4984	8234.08	96.6037
NIST610	AP19C390	ok	5104.93	8.58049	4.29025	47.7391	16.8147	0.23245	0.010197	0.49946	0.0116389	0.910285	0.00303648		4.302	0.0438677	0.910285	0.00276407	0.938803		1347.33	13.7387	8188.08	95.2999
NIST610	AP19C417	ok	5104.03	9.19835	4.59918	49.1446	16.9204	0.232902	0.010114	0.499606	0.0115538	0.909707	0.00325501		4.29365	0.0434259	0.909707	0.00296111	0.939017		1349.69	13.6507	8190.05	94.6261
NIST610	AP19C447	ok	5099.55	8.91099	4.4555	52.0279	16.7083	0.23094	0.011065	0.504455	0.0118656	0.906824	0.00315272		4.33012	0.0479127	0.906824	0.00285897	0.93809		1339.43	14.8207	8255.29	97.9543
NIST610	AP19C477	ok	5102.65	8.86455	4.43228	49.4103	16.7829	0.231654	0.0106867	0.49996	0.011733	0.908819	0.00313671		4.31678	0.0461322	0.908819	0.0028507	0.938427		1343.16	14.354	8194.82	96.1502
NIST610	AP19C508	ok	5100.56	8.41201	4.20601	53.253	16.7724	0.233277	0.0103593	0.501869	0.0114103	0.907471	0.00297631		4.28676	0.044408	0.907471	0.00270092	0.939194		1351.65	14.0022	8220.53	93.7985
NIST610	AP19C534	ok	5102.27	9.06765	4.53382	49.967	16.816	0.231808	0.0101801	0.501667	0.0115993	0.908575	0.00320852		4.31391	0.0439161	0.908575	0.00291518	0.9385		1343.97	13.6818	8217.8	95.3204
NIST610	AP19C567	ok	5100.59	8.60782	4.30391	52.239	16.7479	0.23229	0.00973104	0.503479	0.011651	0.907495	0.0030456		4.30497	0.0418919	0.907495	0.00276386	0.938727		1346.49	13.1027	8242.18	96.0293
NIST610	AP19C598	ok	5099.14	9.40881	4.7044	52.9559	16.8063	0.231444	0.0106496	0.504209	0.0115656	0.906564	0.00332879		4.32069	0.0460136	0.906564	0.00301776	0.938328		1342.06	14.2924	8251.99	95.4389
NIST610	AP19C626	ok	5102.29	9.3885	4.69425	49.2716	16.8301	0.231112	0.0109232	0.504212	0.0119132	0.908586	0.00332205		4.3269	0.0472638	0.908586	0.00301837	0.938171		1340.33	14.6407	8252.03	98.3081
NIST610	AP19C659	ok	5100.89	8.60368	4.30184	50.9879	16.7025	0.231337	0.0109343	0.503293	0.0116773	0.907685	0.00304417		4.32269	0.0472657	0.907685	0.00276315	0.938277		1341.51	14.6685	8239.68	96.2169
NIST610	AP19C689	ok	5102.05	8.87731	4.43866	50.6195	16.8071	0.232229	0.0107034	0.511122	0.011643	0.90843	0.00314114		4.30609	0.0460898	0.90843	0.00285351	0.938699		1346.17	14.4086	8344.66	97.1571
NIST610	AP19C722	ok	5104.51	9.04543	4.52271	45.8293	16.7468	0.229994	0.0106331	0.5054	0.0116807	0.910012	0.00320096		4.34794	0.0462322	0.910012	0.00291291	0.937643		1334.47	14.1896	8267.99	96.5761
NIST610	AP19C755	ok	5104.99	8.26812	4.13406	46.1583	16.687	0.230873	0.0110775	0.508025	0.0118812	0.910322	0.00292595		4.33138	0.047981	0.910322	0.00266355	0.938058		1339.07	14.8336	8303.2	98.6518
NIST610	AP19C788	ok	5104.59	8.58191	4.29095	46.5647	16.7257	0.230856	0.0110552	0.507769	0.0115159	0.910067	0.00303694		4.3317	0.0478876	0.910067	0.00276382	0.93805		1338.99	14.8027	8299.77	95.5795
NIST610	AP19C820	ok	5104.58	9.0842	4.5421	45.9783	16.7678	0.230233	0.0113738	0.50592	0.011788	0.91006	0.00321469		4.34344	0.0494012	0.91006	0.00292556	0.937755		1335.72	15.1921	8274.97	97.5452
NIST610	AP19C853	ok	5105.74	8.29212	4.14606	46.176	16.7455	0.231727	0.0100884	0.509057	0.011536	0.910805	0.00293453		4.31541	0.0435356	0.910805	0.00267279	0.938462		1343.55	13.5542	8317.03	95.9455
NIST610	AP19C885	ok	5102.17	8.64414	4.32207	48.8348	16.6838	0.230533	0.0112841	0.505591	0.0118915	0.908511	0.00305865		4.33776	0.0489478	0.908511	0.00277882	0.937898		1337.29	15.0902	8270.56	98.3496
NIST610	AP19C917	ok	5099.84	8.75728	4.37864	51.8407	16.6942	0.231062	0.0100838	0.507577	0.0116659	0.907009	0.00309838		4.32784	0.043641	0.907009	0.00281025	0.938147		1340.06	13.5129	8297.2	96.7944
NIST610	AP19C947	ok	5106.41	8.64882	4.32441	45.7021	16.8219	0.231991	0.0105872	0.510077	0.0117428	0.911241	0.00306086		4.31051	0.0456361	0.911241	0.00278918	0.938586		1344.93	14.2389	8330.69	97.8255
NIST610	AP19C974	ok	5108.23	8.6697	4.33485	44.0694	16.8691	0.232328	0.0106331	0.512851	0.0116223	0.912413	0.00306848		4.30426	0.0457675	0.912413	0.00279972	0.938746		1346.69	14.3195	8367.78	97.2526
NIST610	JN01B0445	ok	5105.07	5.90493	2.95246	42.7715	17.0906	0.227396	0.0111739	0.492488	0.0123007	0.910375	0.00417932		4.39762	0.0491384	0.910375	0.00380475	0.936416		1320.84	14.7589	8093.88	99.5602
NIST610	JN01B0488	ok	5103.72	5.27611	2.63806	43.3653	16.7901	0.226517	0.00979589	0.494637	0.0127919	0.909508	0.00373406		4.41468	0.0432457	0.909508	0.00339615	0.936002		1316.22	12.8935	8122.96	103.908
NIST610	JN01B0525	ok	5100.65	5.75116	2.87558	47.7837	16.9882	0.227763	0.0103534	0.494588	0.0124197	0.90753	0.00406973		4.39052	0.0454569	0.90753	0.0036934	0.93659		1322.77	13.6951	8122.3	100.877
NIST610	JN01B0562	ok	5096.56	6.11974	3.05987	49.5175	16.9219	0.225107	0.0110734	0.49582	0.0125494	0.904907	0.0043298		4.44234	0.0491916	0.904907	0.00391806	0.935337		1308.8	14.4929	8138.95	102.139
NIST610	JN01B0599	ok	5111.16	5.83111	2.91556	34.5495	17.0383	0.225437	0.0104683	0.494778	0.0126395	0.914306	0.00412814		4.43582	0.0464357	0.914306	0.00377439	0.935493		1310.54	13.7192	8124.86	102.694
NIST610	JN01B0636	ok	5104.43	5.72095	2.86047	41.535	16.896	0.225352	0.0111004	0.494643	0.0123378	0.909964	0.004049		4.4375	0.049258	0.909964	0.00368444	0.935453		1310.09	14.5425	8123.04	100.22
NIST610	JN01B0673	ok	5103.21	5.07744	2.53872	42.5839	16.6374	0.225104	0.0105855	0.493428	0.0126414	0.909177	0.00359337		4.44238	0.0470248	0.909177	0.00326701	0.935336		1308.79	13.8542	8106.6	102.479
NIST610	JN01B0710	ok	5107.77	5.83255	2.91627	36.9961	16.9199	0.224208	0.0107277	0.493195	0.0125399	0.912114	0.00412857		4.46014	0.0478469	0.912114	0.00376572	0.934914		1304.07	13.9897	8103.45	101.617
NIST610	JN01B0747	ok	5102.36	5.60399	2.802	44.8646	16.8921	0.22659	0.0101499	0.499643	0.0123793	0.908632	0.00396588		4.41325	0.0447939	0.908632	0.00360352	0.936036		1316.6	13.3634	8190.54	101.393
NIST610	JN01B0784	ok	5102.06	5.1947	2.59735	44.3004	16.691	0.225654	0.0102569	0.497312	0.0124545	0.908438	0.00367618		4.43155	0.045454	0.908438	0.00333958	0.935595		1311.68	13.4538	8159.09	101.617
NIST610	JN01B0821	ok	5098.05	5.69106	2.84553	49.8283	16.8889	0.227056	0.0102326	0.502237	0.0123434	0.905867	0.00402675		4.4042	0.0450662	0.905867	0.0036477	0.936256		1319.05	13.4973	8225.47	101.53
NIST610	JN01B0864	ok	5109.45	5.36507	2.68253	35.1198	16.7669	0.224075	0.0115168	0.499631	0.0125014	0.913199	0.00379793		4.46279	0.0513971	0.913199	0.00346827	0.934851		1303.37	15.0107	8190.38	102.391
Plesovice	AP28A0006	ok	314.146	65.0859	32.543	339.831	2.8033	0.0541305	0.00832799	0.0180886	0.0339636	0.0526593	0.0143054		18.4739	0.15385	0.0526593	0.00075331	0.858313		339.831	2.83011	362.344	12.3065
Plesovice	AP28A0029	ok	342.935	67.0426	33.5213	341.901	2.83517	0.0544708	0.00837401	0.0163512	0.0319506	0.0533317	0.0148111		18.3585	0.153734	0.0533317	0.0007899	0.858459		341.911	2.86317	327.821	10.474
Plesovice	AP28A0099	ok	338.547	56.1586	28.0793	340.904	2.60416	0.054306	0.00772274	0.0171401	0.0298835	0.0532284	0.0123969		18.4142	0.142208	0.0532284	0.000659869	0.858388		340.904	2.63271	343.504	10.2651
Plesovice	AP28A0149	ok	410.441	55.3929	27.6964	342.205	2.85131	0.0546302	0.00842939	0.0162216	0.0281818	0.0549562	0.0123838		18.3049	0.154299	0.0549562	0.000680564	0.858527		342.886	2.89032	325.244	9.16596
Plesovice	AP28A0364	ok	321.141	62.5341	31.267	337.063	2.65992	0.0536781	0.00796731	0.0162076	0.0319457	0.0528216	0.0137616		18.6296	0.148428	0.0528216	0.000726911	0.85812		337.063	2.68549	324.965	10.3812
Plesovice	AP28A0440	ok	358.728	86.7784	43.3892	340.851	3.26833	0.0543258	0.00966415	0.0185187	0.0344729	0.0537057	0.0192248		18.4075	0.177892	0.0537057	0.00103248	0.858397		341.025	3.29572	370.88	12.7853
Plesovice	AP28A0491	ok	282.238	64.0565	32.0283	338.357	2.75937	0.0538895	0.00822798	0.0161852	0.0360493	0.0519279	0.0139989		18.5565	0.152682	0.0519279	0.000726935	0.85821		338.357	2.78399	324.52	11.6987
Plesovice	DE04A0006	ok	391.699	44.2646	22.1323	333.546	3.69752	0.053195	0.0111873	0.0172619	0.0402165	0.0544983	0.0197269		18.7988	0.210308	0.0544983	0.00107508	0.857914		334.107	3.73777	345.924	13.9118
Plesovice	DE04A0031	ok	429.587	46.1025	23.0512	336.075	3.69032	0.0536671	0.01107	0.0167549	0.0386602	0.0554295	0.0206825		18.6334	0.206271	0.0554295	0.00114642	0.858116		336.997	3.73054	335.849	12.984
Plesovice	DE04A0058	ok	362.639	44.6694	22.3347	334.212	4.09583	0.0532565	0.0123857	0.0160819	0.0416559	0.0537988	0.0198057		18.777	0.232566	0.0537988	0.00106553	0.85794		334.484	4.14281	322.466	13.4326
Plesovice	DE04A0059	ok	399.452	41.2229	20.6115	339.127	3.52342	0.0541125	0.010488	0.0163037	0.0387837	0.0546871	0.0183964		18.48	0.193819	0.0546871	0.00100604	0.858306		339.721	3.56299	326.876	12.6775
Plesovice	DE04A0060	ok	351.26	45.4205	22.7103	335.711	3.86641	0.0534813	0.0116303	0.0168572	0.0370056	0.0535284	0.0200983		18.6981	0.217464	0.0535284	0.00107583	0.858036		335.86	3.90614	337.881	12.5035
Plesovice	OC31A0005	ok	337.399	37.2005	18.6003	341.705	4.33163	0.0544369	0.0128414	0.0166551	0.0353291	0.0532015	0.0164206		18.3699	0.235896	0.0532015	0.000873598	0.858444		341.705	4.38798	333.865	11.7952
Plesovice	OC31A0028	ok	265.553	39.5094	19.7547	336.394	4.54465	0.0535687	0.013661	0.0163339	0.0334054	0.0515512	0.017217		18.6676	0.255018	0.0515512	0.000887557	0.858073		336.394	4.59548	327.477	10.9395
Plesovice	OC31A0063	ok	325.246	43.9191	21.9595	332.852	3.8443	0.0529899	0.0116668	0.0159962	0.0379874	0.0529172	0.0193444		18.8715	0.22017	0.0529172	0.00102365	0.857826		332.852	3.8833	320.759	12.1848
Plesovice	OC31A0103	ok	334.183	42.3599	21.1799	337.511	4.54419	0.0537512	0.0136298	0.016802	0.0465337	0.053126	0.0186873		18.6042	0.253572	0.053126	0.00099278	0.858151		337.511	4.6002	336.784	15.6718
Plesovice	OC31A0136	ok	331.186	39.9725	19.9862	335.915	4.17712	0.0534904	0.0125848	0.0169717	0.0422622	0.0530558	0.0176247		18.6949	0.235273	0.0530558	0.000935091	0.85804		335.915	4.22744	340.157	14.3758
Plesovice	AP19C395	ok	331.688	49.7136	24.8568	343.028	2.63389	0.0546535	0.0077713	0.0167999	0.0251823	0.0530676	0.0109608		18.2971	0.142192	0.0530676	0.000581665	0.858537		343.028	2.66577	336.743	8.47996
Plesovice	AP19C418	ok	333.273	40.7329	20.3664	345.604	2.48607	0.055075	0.00728844	0.0161965	0.02127	0.0531047	0.0089833		18.157	0.132337	0.0531047	0.000477056	0.858717		345.604	2.51892	324.744	6.9073
Plesovice	AP19C509	ok	289.179	40.773	20.3865	337.69	2.35798	0.0537804	0.007065	0.0164157	0.0163896	0.0520858	0.00892164		18.5941	0.131367	0.0520858	0.000464691	0.858164		337.69	2.38578	329.104	5.3939
Plesovice	AP19C568	ok	339.135	47.9411	23.9705	337.511	2.36922	0.0537537	0.00710152	0.0166865	0.027122	0.0532423	0.010584		18.6034	0.132112	0.0532423	0.000563517	0.858153		337.526	2.39695	334.488	9.07197
Plesovice	AP19C690	ok	344.339	47.0772	23.5386	337.973	2.44279	0.0538368	0.00731514	0.0168569	0.0234234	0.0533648	0.0104029		18.5747	0.135876	0.0533648	0.000555149	0.858188		338.034	2.47277	337.876	7.91419
Plesovice	AP19C756	ok	360.726	48.3995	24.1997	334.817	2.20215	0.0533515	0.00664676	0.0162476	0.0222156	0.0537532	0.0107262		18.7436	0.124584	0.0537532	0.000576566	0.857981		335.065	2.2271	325.761	7.23696
Plesovice	AP19C1008		354.839	41.3239	20.662	339.244	2.3993	0.0540593	0.00716426	0.0171308	0.0223964	0.0536132	0.00914856		18.4982	0.132526	0.0536132	0.000490484	0.858283		339.395	2.43152	343.319	7.6891
Plesovice	JN01B0444	ok	383.315	35.006	17.503	343.224	3.13436	0.0547506	0.00922588	0.0203547	0.0323876	0.0542952	0.0155778		18.2646	0.168507	0.0542952	0.000845797	0.858578		343.622	3.17022	407.283	13.1909
Plesovice	JN01B0524	ok	352.579	28.2939	14.1469	337.779	2.84733	0.0538184	0.0085286	0.0168557	0.0289633	0.0535596	0.0125228		18.581	0.15847	0.0535596	0.000670715	0.85818		337.922	2.882	337.852	9.78533
Plesovice	JN01B0598	ok	334.858	32.3871	16.1935	340.305	2.94986	0.0542081	0.00876086	0.016407	0.0289973	0.0531419	0.0142894		18.4474	0.161615	0.0531419	0.000759367	0.858347		340.305	2.98137	328.931	9.53811
Plesovice	JN01B0672	ok	305.417	29.6378	14.8189	338.755	2.86057	0.0539546	0.00853448	0.0177773	0.0316273	0.0524578	0.013008		18.5341	0.158179	0.0524578	0.000682371	0.858238		338.755	2.8911	356.162	11.2645
Plesovice	JN01B0746	ok	315.051	25.8992	12.9496	335.989	3.00907	0.0535025	0.00906748	0.016802	0.0341292	0.0526803	0.0113867		18.6907	0.169478	0.0526803	0.000599854	0.858045		335.989	3.04658	336.784	11.4942
Plesovice	JN01B0820	ok	272.325	27.01	13.505	338.469	2.66202	0.0539079	0.00794451	0.0159913	0.030704	0.0517036	0.0117845		18.5502	0.147372	0.0517036	0.000609301	0.858218		338.469	2.68897	320.663	9.84564
Temora	AP28A0005	ok	543.924	122.143	61.0714	406.636	4.83944	0.0653957	0.0119631	0.0209177	0.040066	0.0583766	0.0279418		15.2915	0.182934	0.0583766	0.00163115	0.863145		408.356	4.8852	418.431	16.7649
Temora	AP28A0064	ok	486.97	93.8572	46.9286	421.922	4.88822	0.0677778	0.011724	0.0211974	0.0240293	0.0568822	0.0212632		14.7541	0.172976	0.0568822	0.0012095	0.864171		422.753	4.95635	423.97	10.1877
Temora	AP28A0187	no comm	473.568	117.979	58.9896	414.446	4.29762	0.0665247	0.0104092	0.0204575	0.0248741	0.0565383	0.0266664		15.032	0.156471	0.0565383	0.00150767	0.863631		415.184	4.32173	409.32	10.1815
Temora	AP28A0233	ok	524.008	101.906	50.9529	413.66	3.98788	0.0665039	0.00968907	0.0204953	0.0257066	0.057848	0.0232335		15.0367	0.145692	0.057848	0.00134401	0.863622		415.058	4.02153	410.068	10.5415
Temora	AP28A0318	ok	244.233	124.327	62.1633	414.122	4.92235	0.0663489	0.0119431	0.0213484	0.0363647	0.0510754	0.0269847		15.0718	0.180004	0.0510754	0.00137825	0.863555		414.122	4.94588	426.956	15.5261
Temora	AP28A0407	ok	378.365	103.218	51.6092	408.081	4.4464	0.0653502	0.0109926	0.0195224	0.0229907	0.0541758	0.0229463		15.3022	0.168211	0.0541758	0.00124313	0.863125		408.081	4.48586	390.789	8.9845
Temora	AP28A0490	ok	555.187	139.799	69.8996	407.676	6.60276	0.0655908	0.016347	0.0200275	0.0348952	0.0586785	0.0320421		15.246	0.249226	0.0586785	0.00188018	0.863229		409.537	6.69468	400.8	13.986
Temora	DE04A0005	ok	325.475	97.1069	48.5535	418.613	7.28999	0.0670921	0.0174933	0.0219069	0.0384585	0.0529225	0.0427729		14.9049	0.260736	0.0529225	0.00226365	0.863876		418.613	7.32292	438.007	16.8451
Temora	DE04A0030	ok	337.93	59.3777	29.6889	418.296	6.58355	0.0670397	0.0159231	0.0209516	0.0305065	0.053214	0.0262122		14.9165	0.237517	0.053214	0.00139486	0.863853		418.296	6.66056	419.102	12.7853
Temora	DE04A0055	ok	318.976	61.4817	30.7409	408.153	5.48923	0.0653621	0.0135626	0.0202904	0.0255689	0.0527713	0.0270497		15.2994	0.2075	0.0527713	0.00142745	0.86313		408.153	5.53562	406.008	10.3812
Temora	DE04A0056	ok	455.514	70.9771	35.4885	412.284	6.00838	0.0661331	0.0146946	0.0210217	0.0284762	0.0560794	0.0319854		15.121	0.222197	0.0560794	0.00179372	0.863462		412.817	6.06617	420.49	11.974
Temora	DE04A0057	ok	494.906	54.3537	27.1768	410.437	5.94832	0.0659133	0.0146746	0.0210123	0.0277467	0.0570873	0.024661		15.1714	0.222634	0.0570873	0.00140783	0.863368		411.488	6.0384	420.305	11.6621
Temora	DE07C157	ok	523.212	58.2527	29.1263	404.371	5.01877	0.06498	0.0125079	0.0207009	0.0334415	0.057827	0.0265584		15.3893	0.192489	0.057827	0.00153579	0.862966		405.841	5.07622	414.139	13.8494
Temora	DE07C179	ok	441.79	34.5065	17.2533	413.89	4.49323	0.0663676	0.0110196	0.0206744	0.0193169	0.0557341	0.0155132		15.0676	0.166039	0.0557341	0.000864614	0.863563		414.234	4.5647	413.614	7.98976
Temora	DE07C202	ok	385.954	54.9404	27.4702	422.092	4.95575	0.0676681	0.0118516	0.0199114	0.0255929	0.054359	0.02446		14.778	0.175143	0.054359	0.00132962	0.864124		422.092	5.00245	398.499	10.1988
Temora	DE07C230	ok	496.855	47.2839	23.6419	416.558	4.58354	0.0669201	0.0111194	0.0183973	0.0195741	0.0571378	0.0214606		14.9432	0.16616	0.0571378	0.00122621	0.863801		417.573	4.64319	368.471	7.21251
Temora	DE07C231	ok	526.046	69.1657	34.5828	406.025	5.70293	0.0652571	0.0141389	0.0185379	0.0327211	0.0579017	0.0315491		15.324	0.216665	0.0579017	0.00182675	0.863085		407.517	5.76184	371.261	12.1481
Temora	OC31A0006	ok	362.633	51.6983	25.8491	410.964	6.10954	0.0658267	0.0150607	0.0201665	0.030536	0.0537987	0.0229222		15.1914	0.228794	0.0537987	0.00123318	0.86333		410.964	6.18942	403.553	12.3229
Temora	OC31A0029	ok	466.613	37.2039	18.602	422.308	5.65327	0.0677971	0.0136065	0.0204054	0.0242602	0.0563609	0.016798		14.7499	0.200694	0.0563609	0.000946747	0.864179		422.87	5.75379	408.286	9.90511
Temora	OC31A0064	ok	408.565	113.02	56.5098	413.802	9.93579	0.0662962	0.0242418	0.0190215	0.0488049	0.0549101	0.0505173		15.0838	0.36566	0.0549101	0.00277391	0.863533		413.802	10.0313	380.857	18.5877
Temora	OC31A0104	ok	466.792	76.3678	38.1839	405.92	6.46284	0.0651156	0.0160522	0.0206157	0.0398799	0.0563654	0.0344819		15.3573	0.246519	0.0563654	0.00194359	0.863024		406.661	6.52781	412.452	16.4485
Temora	OC31A0137	ok	499.367	44.1067	22.0534	417.034	6.04472	0.0670036	0.0147156	0.0206397	0.037012	0.057203	0.0200272		14.9246	0.219624	0.057203	0.00114561	0.863837		418.078	6.15227	412.927	15.2833
Temora	AP19C394	ok	477.465	73.2192	36.6096	421.684	3.66813	0.0677182	0.00879779	0.0207721	0.0194296	0.056638	0.0165606		14.7671	0.129918	0.056638	0.000937958	0.864145		422.394	3.71613	415.549	8.07397
Temora	AP19C448	ok	458.219	94.4671	47.2335	404.691	3.99272	0.0648972	0.00994822	0.0194235	0.0233685	0.0561478	0.0212955		15.409	0.153292	0.0561478	0.0011957	0.86293		405.339	4.03241	388.828	9.08633
Temora	AP19C535	ok	406.138	92.296	46.148	416.891	4.20818	0.0668072	0.010197	0.0211598	0.0261606	0.0548506	0.0206184		14.9684	0.152632	0.0548506	0.00113093	0.863753		416.891	4.25102	423.225	11.0718
Temora	AP19C599	ok	527.724	90.614	45.307	416.442	4.43062	0.0669682	0.0107491	0.0204531	0.0244909	0.0579461	0.0206721		14.9325	0.16051	0.0579461	0.00119787	0.863822		417.864	4.49165	409.233	10.0225
Temora	AP19C660	ok	461.02	88.8124	44.4062	413.895	4.38653	0.0664082	0.0107181	0.0209299	0.0224001	0.0562188	0.0200305		15.0584	0.161397	0.0562188	0.00112609	0.863581		414.48	4.44242	418.673	9.37831
Temora	AP19C821	ok	459.519	59.9273	29.9636	418.127	3.44544	0.0670976	0.00835239	0.0209505	0.0207034	0.0561808	0.0135123		14.9037	0.124481	0.0561808	0.000759131	0.863878		418.646	3.4967	419.082	8.67644
Temora	AP19C1007		427.993	85.1206	42.5603	413.432	4.16521	0.0662644	0.0101908	0.0218865	0.0278281	0.0553898	0.0190881		15.0911	0.15379	0.0553898	0.00105729	0.863519		413.61	4.21501	437.603	12.1776
Temora	JN01B0487	ok	595.439	78.1429	39.0714	426.066	6.39665	0.0687029	0.0150826	0.0216318	0.0367961	0.059775	0.0360647		14.5554	0.219534	0.059775	0.00215577	0.86457		428.336	6.46042	432.565	15.9167
Temora	JN01B0561	ok	422.369	64.9135	32.4568	417.778	5.18484	0.0669634	0.0125018	0.0199145	0.0277272	0.0552504	0.0290849		14.9335	0.186695	0.0552504	0.00160695	0.86382		417.835	5.22367	398.561	11.051
Temora	JN01B0635	ok	533.422	58.1346	29.0673	409.017	4.99589	0.0657632	0.0123059	0.0211801	0.0246302	0.058097	0.0265507		15.2061	0.187125	0.058097	0.00154252	0.863303		410.58	5.05257	423.626	10.434
Temora	JN01B0709	ok	458.617	64.2768	32.1384	418.929	5.35435	0.0672269	0.0128807	0.0214308	0.0318299	0.0561579	0.0289815		14.875	0.1916	0.0561579	0.00162754	0.863934		419.427	5.4025	428.588	13.6419
Temora	JN01B0783	ok	417.871	61.4863	30.7431	416.516	5.02126	0.0667479	0.0121517	0.020803	0.0280932	0.0551392	0.0275277		14.9817	0.182054	0.0551392	0.00151786	0.863727		416.533	5.0616	416.162	11.6913
Temora	JN01B0863	ok	342.284	46.7127	23.3564	415.06	4.56804	0.0665041	0.0111177	0.0210127	0.0255947	0.0533164	0.0206372		15.0367	0.167174	0.0533164	0.0011003	0.863622		415.06	4.61452	420.312	10.7577

## Sheet: PlotDat3
Source sheet	Table S2A-Zircon geochron	5.59353	0.0755387	5.96776	0.0726022	5.84145	0.073322	5.72001	0.0740511	5.60317	0.0747898	5.49066	0.075538	5.38225	0.076296	5.27772	0.077064	5.2	0.0774914	5.2	0.0772688	5.2	0.077714	6.09064	0.0717902	5.54651	0.062	5.68025	0.0755387	5.62747	0.0719981	5.67654	0.077002	5.65172	0.075756	5.64326	0.0720831	5.66733	0.0764565	5.64072	0.0735066	5.69288	0.0764954	5.71442	0.0760372	5.63233	0.0745221	5.68358	0.0747293
Plot name	Concordia1	5.53291	0.0719981	5.96768	0.0726276	5.84137	0.0733479	5.71993	0.0740775	5.60309	0.0748166	5.49058	0.0755654	5.38217	0.0763239	5.27764	0.0770923	5.2	0.0774914	5.2	0.0772688	5.2	0.077714	5.95934	0.0724996	5.59922	0.086	5.67995	0.0756948	5.62714	0.0721813	5.67624	0.0771707	5.65143	0.0759229	5.6429	0.0722602	5.66702	0.076622	5.64041	0.0736756	5.69257	0.0766483	5.71413	0.0761894	5.63203	0.0746863	5.68327	0.0748997
Plot Type	1	5.59152	0.077002	5.96743	0.0726505	5.84113	0.0733712	5.7197	0.0741013	5.60286	0.0748409	5.49035	0.0755901	5.38195	0.0763491	5.27742	0.077118	5.21597	0.0773675	5.21597	0.0771455	5.21597	0.0775895	5.83319	0.0732183			5.67904	0.0758498	5.62614	0.0723632	5.67535	0.0773382	5.65056	0.0760886	5.64183	0.0724361	5.6661	0.0767865	5.63946	0.0738434	5.69165	0.0768002	5.71328	0.0763405	5.63115	0.0748493	5.68235	0.0750688
1st free col	185	5.56886	0.075756	5.96703	0.0726705	5.84074	0.0733916	5.71931	0.0741221	5.60248	0.074862	5.48998	0.0756117	5.38158	0.0763711	5.27707	0.0771404	5.23204	0.0772439	5.23204	0.0770226	5.23204	0.0774653	5.71191	0.0739462			5.67753	0.0760026	5.6245	0.0725426	5.67387	0.0775034	5.64912	0.0762519	5.64005	0.0726095	5.66457	0.0769486	5.6379	0.0740089	5.69013	0.0769499	5.71186	0.0764894	5.62969	0.0750101	5.68082	0.0752356
Sigma Level	1	5.54115	0.0720831	5.96648	0.0726871	5.8402	0.0734086	5.71878	0.0741394	5.60196	0.0748798	5.48947	0.0756298	5.38108	0.0763896	5.27657	0.0771593	5.2482	0.0771206	5.2482	0.0768999	5.2482	0.0773413	5.59522	0.0746836			5.67543	0.0761521	5.62221	0.0727182	5.67181	0.077665	5.64711	0.0764118	5.63758	0.0727792	5.66246	0.0771072	5.63572	0.0741708	5.68802	0.0770965	5.7099	0.0766353	5.62766	0.0751674	5.67869	0.0753988
Absolute Errs	TRUE	5.57976	0.0764565	5.96579	0.0727001	5.83952	0.0734219	5.71812	0.074153	5.6013	0.0748937	5.48883	0.075644	5.38045	0.0764041	5.27596	0.0771741	5.26444	0.0769975	5.26444	0.0767774	5.26444	0.0772175	5.48286	0.0754307			5.67275	0.0762973	5.61929	0.0728887	5.66919	0.077822	5.64456	0.076567	5.63443	0.0729441	5.65976	0.0772613	5.63295	0.0743281	5.68532	0.0772388	5.70739	0.0767769	5.62507	0.0753202	5.67598	0.0755574
Symbol Type	1	5.55088	0.0735066	5.96497	0.0727092	5.83872	0.0734312	5.71733	0.0741626	5.60053	0.0749035	5.48807	0.075654	5.37971	0.0764144	5.27523	0.0771847	5.28078	0.0768746	5.28078	0.0766552	5.28078	0.077094	5.37459	0.0761874			5.66953	0.0764373	5.61577	0.0730529	5.66602	0.0779732	5.64147	0.0767166	5.63063	0.0731029	5.65649	0.0774097	5.62961	0.0744796	5.68206	0.0773759	5.70436	0.0769133	5.62194	0.0754674	5.6727	0.0757101
Inverse Plot	TRUE	5.60543	0.0764954	5.96405	0.0727142	5.83781	0.0734364	5.71644	0.0741679	5.59966	0.074909	5.48722	0.0756597	5.37887	0.0764203	5.2744	0.0771908	5.29722	0.076752	5.29722	0.0765332	5.29722	0.0769708	5.2702	0.0769541			5.66576	0.0765709	5.61167	0.0732098	5.66233	0.0781177	5.63788	0.0768594	5.6262	0.0732545	5.65269	0.0775515	5.62571	0.0746243	5.67827	0.0775069	5.70084	0.0770436	5.6183	0.075608	5.66888	0.0758559
Color Plot	TRUE	5.63316	0.0760372	5.96303	0.0727151	5.83681	0.0734373	5.71546	0.074169	5.5987	0.0749101	5.48627	0.075661	5.37794	0.0764217	5.27349	0.0771923	5.31375	0.0766297	5.31375	0.0764115	5.31375	0.0768478	IsoLine	IsoLine			5.66149	0.0766972	5.60701	0.0733581	5.65815	0.0782542	5.6338	0.0769945	5.62117	0.0733979	5.64838	0.0776855	5.62129	0.0747611	5.67396	0.0776307	5.69684	0.0771668	5.61417	0.0757409	5.66455	0.0759939
3D plot	FALSE	5.5484	0.0745221	5.96194	0.0727117	5.83574	0.073434	5.71441	0.0741657	5.59767	0.0749069	5.48526	0.0756578	5.37695	0.0764185	5.27252	0.0771891	5.33037	0.0765076	5.33037	0.07629	5.33037	0.0767251					5.65675	0.0768155	5.60184	0.0734969	5.6535	0.0783821	5.62926	0.0771209	5.61559	0.0735322	5.64359	0.077811	5.61637	0.0748892	5.66918	0.0777466	5.69239	0.0772821	5.60958	0.0758653	5.65974	0.076123
Linear	FALSE	5.5956	0.0747293	5.9608	0.0727042	5.83463	0.0734265	5.71332	0.0741581	5.5966	0.0748993	5.48421	0.0756501	5.37592	0.0764108	5.2715	0.0771814	5.34709	0.0763857	5.34709	0.0761688	5.34709	0.0766027					5.65156	0.0769248	5.59618	0.0736252	5.64841	0.0785002	5.6243	0.0772378	5.60948	0.0736562	5.63835	0.0779269	5.61099	0.0750075	5.66395	0.0778537	5.68753	0.0773887	5.60456	0.0759803	5.65447	0.0762423
Data Range	P599:S676	5.54244	0.0758744	5.95963	0.0726928	5.83348	0.0734149	5.71219	0.0741464	5.59549	0.0748875	5.48313	0.0756382	5.37485	0.0763987	5.27046	0.0771692	5.36391	0.0762641	5.36391	0.0760479	5.36391	0.0764804					5.64596	0.0770243	5.59008	0.0737421	5.64292	0.0786078	5.61896	0.0773442	5.60289	0.0737692	5.6327	0.0780326	5.6052	0.0751153	5.6583	0.0779513	5.68229	0.0774858	5.59914	0.0760851	5.64879	0.0763509
Filled Symbols	FALSE	5.55607	0.0750653	5.95845	0.0726776	5.83233	0.0733995	5.71106	0.0741308	5.59439	0.0748717	5.48204	0.0756222	5.37379	0.0763826	5.26941	0.0771529	5.38083	0.0761428	5.38083	0.0759271	5.38083	0.0763585					5.64	0.0771135	5.58357	0.0738468	5.63708	0.0787042	5.61326	0.0774395	5.59586	0.0738704	5.62668	0.0781272	5.59902	0.0752119	5.65229	0.0780386	5.6767	0.0775727	5.59337	0.0761789	5.64274	0.0764482
ConcAge	FALSE	5.54085	0.0766115	5.9573	0.0726589	5.83119	0.0733806	5.70995	0.0741116	5.59329	0.0748523	5.48097	0.0756025	5.37273	0.0763626	5.26838	0.0771326	5.39784	0.0760217	5.39784	0.0758067	5.39784	0.0762368					5.63371	0.0771916	5.57672	0.0739385	5.63091	0.0787886	5.60725	0.077523	5.58846	0.073959	5.62033	0.07821	5.5925	0.0752965	5.64595	0.0781152	5.67081	0.0776488	5.58728	0.076261	5.63636	0.0765335
ConcSwap	FALSE	5.6058	0.072298	5.95618	0.0726371	5.8301	0.0733585	5.70888	0.0740892	5.59224	0.0748295	5.47993	0.0755795	5.37172	0.0763393	5.26738	0.0771089	5.41495	0.0759009	5.41495	0.0756865	5.41495	0.0761153					5.62714	0.0772581	5.56955	0.0740165	5.62447	0.0788605	5.60097	0.0775941	5.58072	0.0740345	5.61369	0.0782806	5.58569	0.0753685	5.63932	0.0781803	5.66465	0.0777137	5.58092	0.076331	5.62969	0.0766061
1st Symbol-row	1	5.62849	0.0751942	5.95512	0.0726126	5.82906	0.0733337	5.70786	0.0740641	5.59124	0.074804	5.47896	0.0755536	5.37076	0.0763129	5.26644	0.0770822	5.43217	0.0757803	5.43217	0.0755665	5.43217	0.0759941					5.62033	0.0773126	5.56213	0.0740805	5.6178	0.0789193	5.59446	0.0776523	5.5727	0.0740963	5.60682	0.0783383	5.57864	0.0754274	5.63246	0.0782337	5.65827	0.0777668	5.57434	0.0763883	5.62279	0.0766655
		5.62274	0.0762962	5.95415	0.072586	5.82811	0.0733066	5.70692	0.0740366	5.59033	0.0747761	5.47805	0.0755252	5.36987	0.0762842	5.26557	0.077053	5.44948	0.07566	5.44948	0.0754468	5.44948	0.0758732					5.61333	0.0773546	5.5545	0.0741298	5.61094	0.0789647	5.58778	0.0776972	5.56447	0.074144	5.59975	0.0783829	5.57139	0.0754729	5.6254	0.0782749	5.65172	0.0778077	5.56757	0.0764325	5.61569	0.0767114
		5.53286	0.0745219	5.95327	0.0725576	5.82725	0.0732778	5.70609	0.0740074	5.5895	0.0747464	5.47725	0.0754951	5.36908	0.0762535	5.26479	0.0770219	5.4669	0.0755399	5.4669	0.0753273	5.4669	0.0757525					5.6062	0.0773838	5.54672	0.0741641	5.60394	0.0789964	5.58096	0.0777285	5.55607	0.0741772	5.59255	0.078414	5.564	0.0755046	5.61821	0.0783036	5.64503	0.0778363	5.56066	0.0764633	5.60845	0.0767433
		5.57692	0.072238	5.95252	0.0725282	5.82651	0.0732479	5.70536	0.0739769	5.58879	0.0747155	5.47655	0.0754637	5.36839	0.0762216	5.26411	0.0769895	5.48442	0.07542	5.48442	0.0752081	5.48442	0.075632					5.59898	0.0774002	5.53884	0.0741833	5.59686	0.079014	5.57406	0.077746	5.54756	0.0741957	5.58525	0.0784313	5.55652	0.0755223	5.61092	0.0783196	5.63826	0.0778522	5.55367	0.0764805	5.60112	0.0767612
		5.55028	0.071146	5.9519	0.0724981	5.8259	0.0732173	5.70476	0.0739459	5.5882	0.0746839	5.47597	0.0754316	5.36783	0.076189	5.26356	0.0769563	5.50204	0.0753004	5.50204	0.0750891	5.50204	0.0755118					5.59172	0.0774034	5.53093	0.0741871	5.58974	0.0790175	5.56712	0.0777495	5.53901	0.0741994	5.57792	0.0784347	5.549	0.0755258	5.6036	0.0783228	5.63146	0.0778554	5.54665	0.0764839	5.59376	0.0767647
		5.50252	0.0747694	5.95142	0.0724682	5.82543	0.0731868	5.7043	0.0739149	5.58775	0.0746524	5.47553	0.0753995	5.36739	0.0761564	5.26313	0.0769231	5.51977	0.0751811	5.51977	0.0749703	5.51977	0.0753918					5.58447	0.0773936	5.52302	0.0741756	5.58264	0.0790069	5.56019	0.077739	5.53047	0.0741883	5.5706	0.0784243	5.54149	0.0755152	5.59629	0.0783131	5.62467	0.0778458	5.53963	0.0764736	5.5864	0.076754
		5.62223	0.0732682	5.95109	0.0724388	5.82511	0.073157	5.70399	0.0738845	5.58745	0.0746215	5.47523	0.075368	5.3671	0.0761244	5.26284	0.0768906	5.5376	0.075062	5.5376	0.0748518	5.5376	0.0752721					5.57728	0.0773708	5.51519	0.0741488	5.57559	0.0789823	5.55333	0.0777146	5.52201	0.0741624	5.56335	0.0784001	5.53404	0.0754905	5.58905	0.0782908	5.61793	0.0778236	5.53268	0.0764496	5.57911	0.0767291
		5.55833	0.076587	5.95093	0.0724106	5.82495	0.0731283	5.70383	0.0738553	5.58729	0.0745917	5.47508	0.0753378	5.36695	0.0760936	5.2627	0.0768592	5.55554	0.0749431	5.55554	0.0747336	5.55554	0.0751527					5.57021	0.0773351	5.50748	0.074107	5.56866	0.0789437	5.54657	0.0776764	5.51369	0.0741219	5.55621	0.0783623	5.52672	0.0754519	5.58192	0.0782558	5.61131	0.0777888	5.52584	0.0764121	5.57194	0.0766902
		5.55577	0.0724813	5.95093	0.0723841	5.82496	0.0731013	5.70383	0.0738278	5.58729	0.0745638	5.47508	0.0753093	5.36695	0.0760646	5.2627	0.0768297	5.57359	0.0748245	5.57359	0.0746156	5.57359	0.0750335					5.5633	0.0772869	5.49994	0.0740503	5.56189	0.0788915	5.53997	0.0776248	5.50555	0.0740671	5.54923	0.0783111	5.51956	0.0753996	5.57495	0.0782085	5.60484	0.0777417	5.51915	0.0763613	5.56493	0.0766375
		5.53912	0.0735384	5.9511	0.0723599	5.82512	0.0730766	5.70399	0.0738027	5.58745	0.0745382	5.47523	0.0752833	5.3671	0.076038	5.26284	0.0768027	5.59175	0.0747061	5.59175	0.0744978	5.59175	0.0749145					5.55661	0.0772263	5.49264	0.0739792	5.55533	0.0788261	5.53357	0.0775601	5.49767	0.0739984	5.54247	0.0782469	5.51263	0.0753341	5.5682	0.0781492	5.59856	0.0776827	5.51267	0.0762976	5.55814	0.0765714
		5.61212	0.0742986	5.95142	0.0723384	5.82543	0.0730547	5.7043	0.0737804	5.58775	0.0745154	5.47553	0.07526	5.3674	0.0760144	5.26313	0.0767785	5.61002	0.074588	5.61002	0.0743803	5.61002	0.0747958					5.55017	0.077154	5.48563	0.0738943	5.54902	0.0787479	5.52742	0.0774828	5.49009	0.0739163	5.53597	0.0781701	5.50596	0.0752557	5.56171	0.0780783	5.59253	0.0776121	5.50644	0.0762214	5.55161	0.0764924
		5.56412	0.0751311	5.9519	0.0723201	5.8259	0.073036	5.70476	0.0737613	5.5882	0.0744959	5.47597	0.0752401	5.36783	0.0759941	5.26356	0.0767578	5.62839	0.0744701	5.62839	0.074263	5.62839	0.0746773					5.54404	0.0770703	5.47894	0.073796	5.54301	0.0786574	5.52156	0.0773933	5.48287	0.0738213	5.52978	0.0780813	5.4996	0.0751651	5.55553	0.0779963	5.58679	0.0775305	5.50051	0.0761334	5.54539	0.0764011
		5.55366	0.0783714	5.95252	0.0723052	5.82651	0.0730208	5.70536	0.0737457	5.58879	0.0744801	5.47655	0.075224	5.3684	0.0759775	5.26412	0.0767409	5.64688	0.0743525	5.64688	0.074146	5.64688	0.074559					5.53825	0.0769758	5.47263	0.0736852	5.53733	0.0785554	5.51604	0.0772923	5.47606	0.0737141	5.52394	0.0779811	5.49361	0.0750628	5.54969	0.0779037	5.58137	0.0774384	5.49491	0.076034	5.53952	0.076298
		5.58715	0.0745391	5.95328	0.0722941	5.82725	0.0730095	5.70609	0.0737341	5.58951	0.0744682	5.47725	0.0752118	5.36908	0.0759651	5.26479	0.0767282	5.66548	0.0742351	5.66548	0.0740292	5.66548	0.0744411					5.53286	0.0768713	5.46674	0.0735625	5.53204	0.0784424	5.51088	0.0771806	5.4697	0.0735955	5.51849	0.0778702	5.48802	0.0749496	5.54425	0.0778013	5.57631	0.0773365	5.48969	0.0759241	5.53404	0.0761839
		5.62738	0.0764278	5.95415	0.0722871	5.82811	0.0730022	5.70693	0.0737267	5.59033	0.0744605	5.47806	0.0752039	5.36988	0.075957	5.26557	0.0767198	5.6842	0.074118	5.6842	0.0739126	5.6842	0.0743233					5.52788	0.0767574	5.46132	0.0734288	5.52717	0.0783193	5.50613	0.0770589	5.46385	0.0734663	5.51347	0.0777494	5.48287	0.0748263	5.53924	0.0776897	5.57165	0.0772255	5.48487	0.0758043	5.529	0.0760596
		5.58843	0.078511	5.95513	0.0722841	5.82907	0.0729991	5.70787	0.0737234	5.59125	0.0744572	5.47896	0.0752004	5.37076	0.0759533	5.26644	0.0767161	5.70303	0.074001	5.70303	0.0737963	5.70303	0.0742058					5.52337	0.076635	5.4564	0.0732851	5.52275	0.078187	5.50182	0.076928	5.45854	0.0733273	5.50891	0.0776195	5.4782	0.0746937	5.53469	0.0775697	5.56742	0.0771061	5.48051	0.0756755	5.52442	0.075926
		5.52044	0.0773988	5.95618	0.0722854	5.8301	0.0730003	5.70888	0.0737246	5.59225	0.0744582	5.47994	0.0752014	5.37172	0.0759542	5.26738	0.0767169	5.72198	0.0738844	5.72198	0.0736802	5.72198	0.0740885					5.51935	0.0765049	5.45202	0.0731323	5.51881	0.0780464	5.49798	0.0767889	5.4538	0.0731797	5.50485	0.0774815	5.47403	0.0745528	5.53063	0.0774422	5.56366	0.0769793	5.47662	0.0755386	5.52034	0.075784
		5.5822	0.0781503	5.9573	0.0722908	5.8312	0.0730058	5.70996	0.07373	5.5933	0.0744637	5.48097	0.0752068	5.37274	0.0759597	5.26838	0.0767224	5.74104	0.0737679	5.74104	0.0735643	5.74104	0.0739715					5.51585	0.076368	5.44821	0.0729716	5.51538	0.0778984	5.49463	0.0766426	5.44968	0.0730243	5.50132	0.0773363	5.47041	0.0744046	5.5271	0.0773081	5.56038	0.0768458	5.47323	0.0753946	5.51679	0.0756345
		5.56232	0.0735146	5.95846	0.0723003	5.83233	0.0730153	5.71107	0.0737397	5.59439	0.0744734	5.48204	0.0752167	5.37379	0.0759696	5.26942	0.0767323	5.76022	0.0736517	5.76022	0.0734487	5.76022	0.0738547					5.5129	0.0762253	5.44499	0.0728041	5.51248	0.0777442	5.49181	0.07649	5.44621	0.0728623	5.49834	0.0771849	5.46735	0.0742501	5.52413	0.0771682	5.55761	0.0767067	5.47037	0.0752444	5.51379	0.0754788
		5.63944	0.0760891	5.95963	0.0723137	5.83348	0.0730289	5.7122	0.0737533	5.5955	0.0744872	5.48313	0.0752306	5.37486	0.0759837	5.27046	0.0767466	5.77952	0.0735358	5.77952	0.0733334	5.77952	0.0737382					5.51051	0.0760778	5.44238	0.0726309	5.51014	0.0775847	5.48953	0.0763323	5.44339	0.0726949	5.49592	0.0770284	5.46487	0.0740903	5.52172	0.0770237	5.55537	0.0765628	5.46806	0.0750892	5.51137	0.0753178
		5.55328	0.0748868	5.9608	0.0723307	5.83463	0.0730461	5.71332	0.0737708	5.5966	0.0745049	5.48421	0.0752485	5.37592	0.0760018	5.27151	0.076765	5.79894	0.0734201	5.79894	0.0732182	5.79894	0.0736219					5.50871	0.0759265	5.44041	0.0724533	5.50837	0.0774212	5.4878	0.0761706	5.44127	0.0725232	5.4941	0.0768679	5.463	0.0739265	5.5199	0.0768754	5.55368	0.0764153	5.46632	0.0749301	5.50954	0.0751526
		5.59527	0.0765409	5.96194	0.072351	5.83575	0.0730666	5.71442	0.0737916	5.59768	0.074526	5.48527	0.0752699	5.37696	0.0760235	5.27252	0.076787	5.81848	0.0733046	5.81848	0.0731033	5.81848	0.0735058					5.50749	0.0757725	5.43909	0.0722725	5.50718	0.0772547	5.48664	0.0760059	5.43984	0.0723484	5.49288	0.0767045	5.46175	0.0737597	5.51867	0.0767245	5.55255	0.0762651	5.46514	0.074768	5.50831	0.0749845
		5.55733	0.0744769	5.96303	0.0723741	5.83682	0.0730901	5.71547	0.0738155	5.59871	0.0745502	5.48628	0.0752945	5.37795	0.0760484	5.2735	0.0768122	5.83814	0.0731893	5.83814	0.0729887	5.83814	0.07339					5.50689	0.0756168	5.43843	0.0720898	5.50658	0.0770865	5.48606	0.0758395	5.43913	0.0721717	5.49226	0.0765393	5.46112	0.0735912	5.51806	0.0765719	5.55198	0.0761133	5.46455	0.0746043	5.50769	0.0748146
		5.57226	0.0784547	5.96405	0.0723997	5.83781	0.0731162	5.71644	0.0738418	5.59966	0.074577	5.48722	0.0753217	5.37887	0.076076	5.2744	0.0768402	5.85793	0.0730743	5.85793	0.0728742	5.85793	0.0732744					5.50689	0.0754606	5.43843	0.0719064	5.50658	0.0769176	5.48606	0.0756726	5.43913	0.0719944	5.49226	0.0763736	5.46112	0.073422	5.51806	0.0764188	5.55198	0.075961	5.46455	0.0744399	5.50769	0.0746441
		5.56352	0.0749423	5.96498	0.0724273	5.83872	0.0731441	5.71734	0.0738703	5.60054	0.0746058	5.48808	0.075351	5.37971	0.0761058	5.27523	0.0768705	5.87784	0.0729596	5.87784	0.07276	5.87784	0.0731591					5.50749	0.075305	5.43909	0.0717237	5.50718	0.0767494	5.48664	0.0755062	5.43984	0.0718178	5.49288	0.0762085	5.46175	0.0732535	5.51867	0.0762663	5.55255	0.0758092	5.46514	0.0742762	5.50831	0.0744742
		5.55619	0.0747669	5.96579	0.0724563	5.83952	0.0731736	5.71812	0.0739002	5.60131	0.0746362	5.48883	0.0753818	5.38046	0.0761372	5.27596	0.0769024	5.89788	0.072845	5.89788	0.0726461	5.89788	0.073044					5.50871	0.0751509	5.44041	0.0715429	5.50837	0.0765829	5.4878	0.0753415	5.44127	0.071643	5.4941	0.0760451	5.463	0.0730867	5.5199	0.0761154	5.55368	0.0756591	5.46632	0.0741141	5.50954	0.0743061
		5.62534	0.0757705	5.96648	0.0724861	5.8402	0.0732039	5.71878	0.073931	5.60196	0.0746675	5.48947	0.0754137	5.38108	0.0761695	5.27658	0.0769352	5.91805	0.0727307	5.91805	0.0725324	5.91805	0.0729291					5.51051	0.0749996	5.44238	0.0713653	5.51014	0.0764194	5.48953	0.0751798	5.44339	0.0714713	5.49592	0.0758846	5.46487	0.0729228	5.52172	0.0759671	5.55537	0.0755115	5.46806	0.0739549	5.51137	0.0741409
		5.59501	0.0770295	5.96703	0.0725162	5.84074	0.0732345	5.71931	0.0739621	5.60248	0.0746991	5.48998	0.0754458	5.38158	0.0762022	5.27707	0.0769685	5.93834	0.0726167	5.93834	0.0724189	5.93834	0.0728145					5.5129	0.0748521	5.44499	0.0711921	5.51248	0.0762599	5.49181	0.0750221	5.44621	0.0713038	5.49834	0.0757281	5.46735	0.0727631	5.52413	0.0758225	5.55761	0.0753677	5.47037	0.0737997	5.51379	0.0739799
		5.58389	0.0760953	5.96744	0.0725459	5.84113	0.0732647	5.7197	0.0739929	5.60286	0.0747305	5.49035	0.0754777	5.38195	0.0762346	5.27743	0.0770014	5.95876	0.0725028	5.95876	0.0723056	5.95876	0.0727001					5.51585	0.0747094	5.44821	0.0710246	5.51538	0.0761057	5.49463	0.0748695	5.44968	0.0711419	5.50132	0.0755767	5.47041	0.0726086	5.5271	0.0756827	5.56038	0.0752286	5.47323	0.0736496	5.51679	0.0738241
		5.53877	0.0754055	5.96768	0.0725748	5.84137	0.0732941	5.71993	0.0740227	5.60309	0.0747609	5.49058	0.0755086	5.38217	0.0762661	5.27764	0.0770335	5.97931	0.0723892	5.97931	0.0721926	5.97931	0.0725859					5.51935	0.0745725	5.45202	0.0708639	5.51881	0.0759577	5.49798	0.0747232	5.4538	0.0709865	5.50485	0.0754314	5.47403	0.0724603	5.53063	0.0755485	5.56366	0.0750951	5.47662	0.0735056	5.52034	0.0736747
		5.60108	0.0769466	5.96776	0.0726022	5.84145	0.073322	5.72001	0.0740511	5.60317	0.0747898	5.49066	0.075538	5.38225	0.076296	5.27772	0.077064	6	0.0722759	6	0.0720798	6	0.072472					5.52337	0.0744424	5.4564	0.0707111	5.52275	0.0758171	5.50182	0.0745841	5.45854	0.0708388	5.50891	0.0752934	5.4782	0.0723194	5.53469	0.075421	5.56742	0.0749682	5.48051	0.0733687	5.52442	0.0735327
		5.58058	0.0760076	ConcTikEll	ConcTikEll	ConcTikEll	ConcTikEll	ConcTikEll	ConcTikEll	ConcTikEll	ConcTikEll	ConcTikEll	ConcTikEll	ConcTikEll	ConcTikEll	ConcTikEll	ConcTikEll	6	0.0722759	6	0.0720798	6	0.072472					5.52788	0.07432	5.46132	0.0705674	5.52717	0.0756848	5.50613	0.0744532	5.46385	0.0706999	5.51347	0.0751635	5.48287	0.0721869	5.53924	0.0753011	5.57165	0.0748488	5.48487	0.0732399	5.529	0.0733991
		5.59458	0.0733812															IsoLine	IsoLine	ConcBand	ConcBand	ConcBand	ConcBand					5.53286	0.0742062	5.46674	0.0704338	5.53204	0.0755617	5.51088	0.0743315	5.4697	0.0705707	5.51849	0.0750427	5.48802	0.0720636	5.54425	0.0751895	5.57631	0.0747378	5.48969	0.0731201	5.53404	0.0732748
		5.53293	0.0754727																									5.53825	0.0741016	5.47263	0.0703111	5.53733	0.0754487	5.51604	0.0742198	5.47606	0.070452	5.52394	0.0749318	5.49361	0.0719504	5.54969	0.0750871	5.58137	0.0746359	5.49491	0.0730102	5.53952	0.0731607
		5.54021	0.0746902																									5.54404	0.0740072	5.47894	0.0702002	5.54301	0.0753467	5.52156	0.0741188	5.48287	0.0703448	5.52978	0.0748316	5.4996	0.0718481	5.55553	0.0749945	5.58679	0.0745438	5.50051	0.0729108	5.54539	0.0730576
		5.53857	0.0762574																									5.55017	0.0739235	5.48563	0.0701019	5.54902	0.0752562	5.52742	0.0740293	5.49009	0.0702499	5.53597	0.0747429	5.50596	0.0717575	5.56171	0.0749125	5.59253	0.0744622	5.50644	0.0728227	5.55161	0.0729662
		5.61229	0.0759274																									5.55661	0.0738511	5.49264	0.070017	5.55533	0.075178	5.53357	0.073952	5.49767	0.0701677	5.54247	0.0746661	5.51263	0.0716791	5.5682	0.0748416	5.59856	0.0743916	5.51267	0.0727466	5.55814	0.0728872
		5.55718	0.0748217																									5.5633	0.0737906	5.49994	0.0699459	5.56189	0.0751125	5.53997	0.0738873	5.50555	0.070099	5.54923	0.0746019	5.51956	0.0716136	5.57495	0.0747822	5.60484	0.0743326	5.51915	0.0726829	5.56493	0.0728212
		5.55069	0.0755904																									5.57021	0.0737423	5.50748	0.0698893	5.56866	0.0750604	5.54657	0.0738357	5.51369	0.0700442	5.55621	0.0745506	5.52672	0.0715613	5.58192	0.0747349	5.61131	0.0742855	5.52584	0.0726321	5.57194	0.0727685
		5.61745	0.0753268																									5.57728	0.0737066	5.51519	0.0698474	5.57559	0.0750218	5.55333	0.0737975	5.52201	0.0700037	5.56335	0.0745128	5.53404	0.0715227	5.58905	0.0747	5.61793	0.0742508	5.53268	0.0725946	5.57911	0.0727295
		5.55281	0.075245																									5.58447	0.0736838	5.52302	0.0698206	5.58264	0.0749972	5.56019	0.0737731	5.53047	0.0699778	5.5706	0.0744886	5.54149	0.071498	5.59629	0.0746776	5.62467	0.0742285	5.53963	0.0725706	5.5864	0.0727046
		5.62259	0.0750184																									5.59172	0.073674	5.53093	0.0698091	5.58974	0.0749866	5.56712	0.0737626	5.53901	0.0699667	5.57792	0.0744782	5.549	0.0714873	5.6036	0.074668	5.63146	0.074219	5.54665	0.0725603	5.59376	0.0726939
		5.62245	0.0746615																									5.59898	0.0736773	5.53884	0.0698129	5.59686	0.0749901	5.57406	0.0737661	5.54756	0.0699704	5.58525	0.0744817	5.55652	0.0714909	5.61092	0.0746712	5.63826	0.0742221	5.55367	0.0725637	5.60112	0.0726975
		5.52853	0.074658																									5.6062	0.0736936	5.54672	0.0698321	5.60394	0.0750077	5.58096	0.0737836	5.55607	0.069989	5.59255	0.074499	5.564	0.0715086	5.61821	0.0746872	5.64503	0.0742381	5.56066	0.0725809	5.60845	0.0727153
		5.5968	0.0744748																									5.61333	0.0737229	5.5545	0.0698664	5.61094	0.0750394	5.58778	0.0738149	5.56447	0.0700222	5.59975	0.07453	5.57139	0.0715403	5.6254	0.0747159	5.65172	0.0742666	5.56757	0.0726117	5.61569	0.0727473
		5.6369	0.0754926																									5.62033	0.0737649	5.56213	0.0699158	5.6178	0.0750848	5.59446	0.0738598	5.5727	0.0700699	5.60682	0.0745746	5.57864	0.0715857	5.63246	0.0747571	5.65827	0.0743076	5.57434	0.0726559	5.62279	0.0727931
		5.57989	0.0745565																									5.62714	0.0738193	5.56955	0.0699797	5.62447	0.0751436	5.60097	0.073918	5.58072	0.0701317	5.61369	0.0746324	5.58569	0.0716447	5.63932	0.0748104	5.66465	0.0743607	5.58092	0.0727132	5.62969	0.0728526
		5.55124	0.0761218																									5.63371	0.0738859	5.57672	0.0700578	5.63091	0.0752155	5.60725	0.0739891	5.58846	0.0702071	5.62033	0.0747029	5.5925	0.0717167	5.64595	0.0748756	5.67081	0.0744255	5.58728	0.0727832	5.63636	0.0729252
		5.54063	0.075914																									5.64	0.073964	5.58357	0.0701494	5.63708	0.0752999	5.61326	0.0740726	5.59586	0.0702958	5.62668	0.0747858	5.59902	0.0718013	5.65229	0.0749521	5.6767	0.0745017	5.59337	0.0728653	5.64274	0.0730104
		5.60376	0.0745901																									5.64596	0.0740531	5.59008	0.0702541	5.64292	0.0753963	5.61896	0.0741679	5.60289	0.070397	5.6327	0.0748804	5.6052	0.0718978	5.6583	0.0750395	5.68229	0.0745886	5.59914	0.0729591	5.64879	0.0731077
		5.53286	0.0761116																									5.65156	0.0741527	5.59618	0.070371	5.64841	0.0755039	5.6243	0.0742743	5.60948	0.07051	5.63835	0.074986	5.61099	0.0720057	5.66395	0.0751371	5.68753	0.0746857	5.60456	0.0730639	5.65447	0.0732164
		5.5196	0.0733571																									5.65675	0.074262	5.60184	0.0704993	5.6535	0.075622	5.62926	0.0743912	5.61559	0.070634	5.64359	0.0751019	5.61637	0.072124	5.66918	0.0752442	5.69239	0.0747922	5.60958	0.0731789	5.65974	0.0733357
		5.57438	0.07591																									5.66149	0.0743802	5.60701	0.0706381	5.65815	0.0757499	5.6338	0.0745176	5.62117	0.0707682	5.64838	0.0752274	5.62129	0.0722521	5.67396	0.0753601	5.69684	0.0749075	5.61417	0.0733033	5.66455	0.0734648
		5.56847	0.0725406																									5.66576	0.0745066	5.61167	0.0707865	5.66233	0.0758864	5.63788	0.0746527	5.6262	0.0709116	5.65269	0.0753615	5.62571	0.0723889	5.67827	0.0754839	5.70084	0.0750308	5.6183	0.0734362	5.66888	0.0736027
		5.55496	0.0746065																									5.66953	0.0746402	5.61577	0.0709433	5.66602	0.0760309	5.64147	0.0747955	5.63063	0.0710633	5.65649	0.0755032	5.62961	0.0725336	5.68206	0.0756148	5.70436	0.075161	5.62194	0.0735768	5.6727	0.0737486
		5.63899	0.0739456																									5.67275	0.0747801	5.61929	0.0711076	5.66919	0.0761821	5.64456	0.0749451	5.63443	0.0712221	5.65976	0.0756517	5.63295	0.0726851	5.68532	0.075752	5.70739	0.0752975	5.62507	0.073724	5.67598	0.0739013
		5.55367	0.0743143																									5.67543	0.0749253	5.62221	0.0712781	5.67181	0.0763391	5.64711	0.0751003	5.63758	0.0713869	5.66246	0.0758057	5.63572	0.0728424	5.68802	0.0758943	5.7099	0.0754391	5.62766	0.0738768	5.67869	0.0740598
		5.56866	0.0747583																									5.67753	0.0750749	5.6245	0.0714536	5.67387	0.0765007	5.64912	0.0752602	5.64005	0.0715566	5.66457	0.0759644	5.6379	0.0730043	5.69013	0.0760408	5.71186	0.0755849	5.62969	0.0740341	5.68082	0.074223
		5.61402	0.0728903																									5.67904	0.0752277	5.62614	0.071633	5.67535	0.0766659	5.65056	0.0754235	5.64183	0.0717301	5.6661	0.0761265	5.63946	0.0731698	5.69165	0.0761906	5.71328	0.0757339	5.63115	0.0741949	5.68235	0.0743898
		5.54742	0.0732364																									5.67995	0.0753827	5.62714	0.0718149	5.67624	0.0768334	5.65143	0.0755892	5.6429	0.071906	5.66702	0.0762909	5.64041	0.0733376	5.69257	0.0763424	5.71413	0.075885	5.63203	0.0743579	5.68327	0.074559
		5.5636	0.0738227																									5.68025	0.0755387	5.62747	0.0719981	5.67654	0.077002	5.65172	0.075756	5.64326	0.0720831	5.66733	0.0764565	5.64072	0.0735066	5.69288	0.0764954	5.71442	0.0760372	5.63233	0.0745221	5.68358	0.0747293
		5.62503	0.0736626																									Black	Black	Black	Black	Black	Black	Black	Black	Black	Black	Black	Black	Black	Black	Black	Black	Black	Black	Black	Black	Black	Black
		5.55616	0.0748253
		IsoLine	IsoLine
[truncated: 136 more columns]

## Sheet: PlotDat4
Source sheet	Table S2A-Zircon geochron	0.3	1066.81	1	1082.87	65.3737
Plot name	Average3	78.7	1066.81	2	985.887	81.7066
Plot Type	15			3	1121.24	68.9232
1st free col	8			4	1088.63	69.6253
Sigma Level	1			5	988.287	78.8724
Absolute Errs	TRUE			6	1107.05	68.2768
Symbol Type	1			7	1027.95	73.352
Inverse Plot	FALSE			8	1108.06	63.027
Color Plot	TRUE			9	1096.05	63.202
3D plot	FALSE			10	1055.64	70.0011
Linear	FALSE			11	1061.23	72.3647
Data Range	D599:E676			12	1091.76	62.9265
Filled Symbols	FALSE			13	1070.25	67.0433
ConcAge	FALSE			14	1111.09	64.0355
ConcSwap	FALSE			15	994.342	76.3914
1st Symbol-row	1			16	1073.7	68.9712
				17	1102.85	48.5525
				18	1055.64	48.2175
				19	992.653	53.174
				20	961.61	59.0828
				21	1062.31	47.8918
				22	1021.38	56.8456
				23	1110.46	52.815
				24	999.487	53.434
				25	1028.83	30.4185
				26	1049.59	32.9599
				27	1072.01	28.8579
				28	1156.3	31.591
				29	1056.1	31.5627
				30	1106.3	54.8375
				31	1159.83	49.7867
				32	1131.48	47.4526
				33	1150.7	49.0995
				34	1028.17	51.7906
				35	1097.42	44.3097
				36	1065.46	38.9712
				37	1109.25	46.2988
				38	1054.42	41.7396
				39	1158.41	45.3185
				40	1066.96	49.9707
				41	1062.24	55.6808
				42	1089.01	56.0582
				43	1121.95	64.5203
				44	1097.58	51.7251
				45	1079.33	65.3785
				46	1119.8	49.5654
				47	1095.27	61.7137
				48	1024.5	56.1372
				49	1081.12	61.8094
				50	1060.18	60.0792
				51	1101.84	50.4057
				52	1093.16	55.8388
				53	1063.72	53.8814
				54	1084.24	42.4955
				55	1077.24	42.26
				56	1075.05	43.8398
				57	1068.99	46.9535
				58	1059.4	43.6299
				59	1059.31	53.073
				60	1054.36	44.4862
				61	1081.65	47.5746
				62	1056.57	50.2822
				63	1098.28	49.0849
				64	1092.8	46.7051
				65	1057.48	30.7235
				66	1098.01	36.6826
				67	1023.83	37.9358
				68	1092.7	34.9005
				69	1001.15	33.3653
				70	1057.92	31.6388
				71	1039.98	32.2815
				72	1050.02	39.9187
				73	1062.01	31.4724
				74	1010.9	32.2416
				75	1020.5	32.7746
				76	1036.62	35.4289
				77	1032.24	35.2688
				78	1063.81	37.6094
				IsoLine	IsoLine	IsoLine	IsoLine

## Sheet: PlotDat5
Source sheet	Table S2A-Zircon geochron	0.3	0.909289	1	0.910202	0.0030242
Plot name	Average4	71.7	0.909289	2	0.913061	0.002868
Plot Type	15			3	0.908108	0.00300097
1st free col	8			4	0.90953	0.00296445
Sigma Level	1			5	0.907499	0.00299857
Absolute Errs	TRUE			6	0.911544	0.00308837
Symbol Type	1			7	0.906014	0.00310832
Inverse Plot	FALSE			8	0.909303	0.00298982
Color Plot	TRUE			9	0.911695	0.00298711
3D plot	FALSE			10	0.910306	0.00295666
Linear	FALSE			11	0.906844	0.00287935
Data Range	R678:S748			12	0.90824	0.00285286
Filled Symbols	FALSE			13	0.909383	0.00295104
ConcAge	FALSE			14	0.90904	0.00306281
ConcSwap	FALSE			15	0.910943	0.00278221
1st Symbol-row	1			16	0.911777	0.00320443
				17	0.896021	0.00481926
				18	0.905774	0.00490259
				19	0.905904	0.00490599
				20	0.908475	0.00484425
				21	0.905123	0.00467564
				22	0.915753	0.0049766
				23	0.90809	0.00313095
				24	0.911342	0.00322641
				25	0.909742	0.00338659
				26	0.909155	0.00322393
				27	0.906675	0.00309717
				28	0.91318	0.00337705
				29	0.909054	0.00411013
				30	0.914223	0.00414279
				31	0.910394	0.00449818
				32	0.906633	0.00394468
				33	0.908274	0.00493184
				34	0.910138	0.00451532
				35	0.907505	0.00463158
				36	0.914914	0.00465637
				37	0.912807	0.00429373
				38	0.903553	0.004236
				39	0.911129	0.00287389
				40	0.910285	0.00276407
				41	0.909707	0.00296111
				42	0.906824	0.00285897
				43	0.908819	0.0028507
				44	0.907471	0.00270092
				45	0.908575	0.00291518
				46	0.907495	0.00276386
				47	0.906564	0.00301776
				48	0.908586	0.00301837
				49	0.907685	0.00276315
				50	0.90843	0.00285351
				51	0.910012	0.00291291
				52	0.910322	0.00266355
				53	0.910067	0.00276382
				54	0.91006	0.00292556
				55	0.910805	0.00267279
				56	0.908511	0.00277882
				57	0.907009	0.00281025
				58	0.911241	0.00278918
				59	0.912413	0.00279972
				60	0.910375	0.00380475
				61	0.909508	0.00339615
				62	0.90753	0.0036934
				63	0.904907	0.00391806
				64	0.914306	0.00377439
				65	0.909964	0.00368444
				66	0.909177	0.00326701
				67	0.912114	0.00376572
				68	0.908632	0.00360352
				69	0.908438	0.00333958
				70	0.905867	0.0036477
				71	0.913199	0.00346827
				IsoLine	IsoLine	IsoLine	IsoLine

## Sheet: PlotDat6
Source sheet	Table S2A-Zircon geochron	18.4739	0.0526593	19.3653	0.0529825	19.0644	0.0530994	18.7726	0.0532166	18.4893	0.0533342	18.2142	0.0534522	17.947	0.0535705	17.6873	0.0536892	17.6	0.0536467	17.6	0.0535366	17.6	0.0537567	19.6492	0.0527951	17.863	0.06	18.7069	0.0526593	18.5914	0.0533317	18.6296	0.0532284	18.5386	0.0549562	18.8545	0.0528216	18.677	0.0537057	18.7878	0.0519279	19.1174	0.0544983	18.9459	0.0554295	19.1294	0.0537988	18.7737	0.0546871
Plot name	Concordia5	18.3585	0.0533317	19.365	0.0529961	19.0642	0.053113	18.7723	0.0532304	18.489	0.053348	18.2139	0.0534661	17.9467	0.0535845	17.687	0.0537032	17.6	0.0536467	17.6	0.0535366	17.6	0.0537567	19.3393	0.0529114	19.0239	0.048	18.7061	0.0527548	18.5906	0.0534318	18.6288	0.0533121	18.5378	0.0550425	18.8537	0.0529137	18.6763	0.0538148	18.787	0.0520201	19.1166	0.0546119	18.9451	0.0555506	19.1285	0.0539114	18.7729	0.0547934
Plot Type	1	18.4142	0.0532284	19.3643	0.0530081	19.0634	0.0531251	18.7716	0.0532425	18.4883	0.0533602	18.2132	0.0534783	17.946	0.0535968	17.6864	0.0537156	17.641	0.0536275	17.641	0.0535175	17.641	0.0537375	19.0389	0.0530281			18.7037	0.0528496	18.5881	0.0535313	18.6266	0.0533952	18.5354	0.0551281	18.8513	0.0530052	18.6743	0.0539234	18.7846	0.0521116	19.1143	0.054725	18.9428	0.0556712	19.1259	0.0540235	18.7708	0.0548992
1st free col	89	18.3049	0.0549562	19.363	0.0530182	19.0622	0.0531352	18.7704	0.0532527	18.4871	0.0533705	18.2121	0.0534886	17.9449	0.0536071	17.6852	0.053726	17.6822	0.0536084	17.6822	0.0534985	17.6822	0.0537183	18.7474	0.0531452			18.6996	0.0529431	18.5841	0.0536293	18.6228	0.0534771	18.5313	0.0552126	18.8474	0.0530955	18.6711	0.0540309	18.7805	0.0522018	19.1104	0.054837	18.939	0.0557906	19.1217	0.0541345	18.7672	0.055004
Sigma Level	1	18.6296	0.0528216	19.3613	0.0530262	19.0605	0.0531433	18.7687	0.0532608	18.4855	0.0533786	18.2105	0.0534968	17.9433	0.0536154	17.6837	0.0537343	17.7236	0.0535893	17.7236	0.0534794	17.7236	0.0536991	18.4644	0.0532626			18.694	0.0530346	18.5784	0.0537253	18.6176	0.0535572	18.5256	0.0552953	18.8419	0.0531838	18.6665	0.0541368	18.7749	0.0522901	19.105	0.0549473	18.9338	0.0559082	19.1157	0.0542438	18.7623	0.0551072
Absolute Errs	TRUE	18.4075	0.0537057	19.3592	0.053032	19.0584	0.0531491	18.7667	0.0532666	18.4835	0.0533845	18.2085	0.0535028	17.9413	0.0536214	17.6817	0.0537403	17.7652	0.0535701	17.7652	0.0534604	17.7652	0.0536799	18.1897	0.0533804			18.6868	0.0531235	18.5712	0.0538184	18.611	0.053635	18.5184	0.0553755	18.835	0.0532695	18.6607	0.0542407	18.7678	0.0523759	19.0982	0.0550554	18.927	0.0560235	19.1081	0.054351	18.7559	0.0552084
Symbol Type	1	18.5565	0.0519279	19.3567	0.0530354	19.056	0.0531526	18.7642	0.0532701	18.481	0.053388	18.2061	0.0535063	17.939	0.0536249	17.6794	0.0537439	17.807	0.053551	17.807	0.0534414	17.807	0.0536607	17.9229	0.0534985			18.6781	0.0532091	18.5626	0.0539082	18.603	0.05371	18.5097	0.0554529	18.8266	0.0533521	18.6537	0.0543419	18.7592	0.0524585	19.0898	0.0551608	18.9189	0.0561359	19.0989	0.0544554	18.7483	0.055307
Inverse Plot	TRUE	18.7988	0.0544983	19.3538	0.0530365	19.0532	0.0531537	18.7614	0.0532712	18.4783	0.0533891	18.2034	0.0535074	17.9363	0.0536261	17.6768	0.0537451	17.849	0.0535319	17.849	0.0534224	17.849	0.0536415	17.6635	0.0536171			18.668	0.0532909	18.5525	0.0539939	18.5936	0.0537817	18.4996	0.0555268	18.8169	0.053431	18.6454	0.05444	18.7492	0.0525374	19.0801	0.055263	18.9093	0.0562448	19.0881	0.0545567	18.7393	0.0554026
Color Plot	TRUE	18.6334	0.0554295	19.3507	0.0530351	19.0501	0.0531523	18.7584	0.0532698	18.4753	0.0533878	18.2004	0.0535061	17.9334	0.0536247	17.6739	0.0537438	17.8911	0.0535129	17.8911	0.0534033	17.8911	0.0536224	IsoLine	IsoLine			18.6565	0.0533682	18.541	0.054075	18.583	0.0538494	18.4881	0.0555966	18.8058	0.0535056	18.636	0.0545346	18.7378	0.052612	19.069	0.0553614	18.8984	0.0563498	19.0758	0.0546543	18.729	0.0554948
3D plot	FALSE	18.777	0.0537988	19.3473	0.0530312	19.0468	0.0531485	18.7551	0.053266	18.4721	0.0533839	18.1973	0.0535022	17.9303	0.0536209	17.6708	0.0537399	17.9335	0.0534938	17.9335	0.0533843	17.9335	0.0536032					18.6438	0.0534406	18.5282	0.0541509	18.5712	0.0539128	18.4753	0.055662	18.7935	0.0535755	18.6255	0.0546251	18.7251	0.0526818	19.0565	0.0554557	18.8862	0.0564503	19.0621	0.0547477	18.7176	0.055583
Linear	FALSE	18.48	0.0546871	19.3438	0.0530251	19.0433	0.0531423	18.7517	0.0532599	18.4687	0.0533778	18.194	0.0534961	17.927	0.0536147	17.6676	0.0537337	17.976	0.0534747	17.976	0.0533654	17.976	0.0535841					18.6298	0.0535074	18.5143	0.054221	18.5583	0.0539714	18.4613	0.0557224	18.7801	0.05364	18.6139	0.0547111	18.7113	0.0527464	19.0428	0.0555453	18.8728	0.0565459	19.0469	0.0548365	18.705	0.0556668
Data Range	P750:S779	18.6981	0.0535284	19.3402	0.0530167	19.0397	0.0531339	18.7482	0.0532515	18.4653	0.0533694	18.1906	0.0534876	17.9237	0.0536063	17.6643	0.0537253	18.0188	0.0534556	18.0188	0.0533464	18.0188	0.0535649					18.6148	0.0535684	18.4993	0.0542849	18.5444	0.0540247	18.4462	0.0557774	18.7655	0.0536988	18.6013	0.0547923	18.6963	0.0528052	19.028	0.0556298	18.8582	0.056636	19.0305	0.0549202	18.6912	0.0557459
Filled Symbols	FALSE	18.3699	0.0532015	19.3366	0.0530063	19.0362	0.0531235	18.7447	0.053241	18.4618	0.0533589	18.1872	0.0534771	17.9203	0.0535957	17.661	0.0537147	18.0617	0.0534366	18.0617	0.0533274	18.0617	0.0535458					18.5988	0.0536229	18.4833	0.0543421	18.5296	0.0540725	18.4301	0.0558267	18.7501	0.0537514	18.5878	0.0548681	18.6804	0.0528578	19.012	0.0557087	18.8425	0.0567202	19.0128	0.0549985	18.6765	0.0558198
ConcAge	FALSE	18.6676	0.0515512	19.333	0.0529941	19.0327	0.0531112	18.7413	0.0532287	18.4584	0.0533465	18.1838	0.0534647	17.917	0.0535833	17.6578	0.0537022	18.1049	0.0534176	18.1049	0.0533084	18.1049	0.0535267					18.5819	0.0536707	18.4664	0.0543922	18.514	0.0541144	18.4132	0.0558699	18.7338	0.0537975	18.5734	0.0549383	18.6637	0.0529039	18.9949	0.0557818	18.8258	0.0567981	18.994	0.0550709	18.6608	0.0558881
ConcSwap	FALSE	18.8715	0.0529172	19.3296	0.0529802	19.0293	0.0530973	18.7379	0.0532147	18.4551	0.0533325	18.1806	0.0534507	17.9138	0.0535692	17.6546	0.0536881	18.1482	0.0533985	18.1482	0.0532895	18.1482	0.0535076					18.5642	0.0537114	18.4487	0.0544349	18.4976	0.05415	18.3955	0.0559067	18.7167	0.0538368	18.5582	0.0550025	18.6461	0.0529432	18.9769	0.0558486	18.8081	0.0568693	18.9741	0.0551371	18.6442	0.0559507
1st Symbol-row	1	18.6042	0.053126	19.3263	0.052965	19.0261	0.053082	18.7348	0.0531994	18.452	0.0533171	18.1775	0.0534353	17.9108	0.0535537	17.6516	0.0536726	18.1917	0.0533795	18.1917	0.0532706	18.1917	0.0534885					18.5459	0.0537447	18.4304	0.0544698	18.4807	0.0541792	18.3771	0.0559368	18.6991	0.0538689	18.5422	0.0550603	18.628	0.0529753	18.9581	0.0559089	18.7896	0.0569336	18.9532	0.0551968	18.6268	0.056007
		18.6949	0.0530558	19.3233	0.0529488	19.0231	0.0530657	18.7318	0.053183	18.4492	0.0533007	18.1747	0.0534188	17.908	0.0535372	17.6489	0.053656	18.2355	0.0533605	18.2355	0.0532516	18.2355	0.0534694					18.5271	0.0537704	18.4117	0.0544968	18.4634	0.0542017	18.3583	0.05596	18.6809	0.0538938	18.5256	0.0551116	18.6093	0.0530001	18.9384	0.0559622	18.7704	0.0569905	18.9315	0.0552497	18.6087	0.056057
		18.2971	0.0530676	19.3206	0.0529318	19.0205	0.0530487	18.7292	0.0531659	18.4466	0.0532836	18.1721	0.0534015	17.9055	0.0535199	17.6464	0.0536386	18.2795	0.0533415	18.2795	0.0532327	18.2795	0.0534503					18.5079	0.0537883	18.3925	0.0545156	18.4456	0.0542174	18.339	0.0559762	18.6624	0.053911	18.5084	0.055156	18.5903	0.0530174	18.9181	0.0560085	18.7504	0.0570398	18.909	0.0552956	18.59	0.0561003
		18.157	0.0531047	19.3183	0.0529144	19.0182	0.0530313	18.727	0.0531484	18.4444	0.053266	18.1699	0.0533839	17.9033	0.0535022	17.6443	0.0536208	18.3236	0.0533225	18.3236	0.0532138	18.3236	0.0534312					18.4885	0.0537983	18.3731	0.054526	18.4277	0.0542262	18.3196	0.0559852	18.6437	0.0539207	18.4907	0.0551933	18.571	0.0530271	18.8972	0.0560474	18.7299	0.0570813	18.8859	0.0553341	18.5708	0.0561366
		18.5941	0.0520858	19.3164	0.052897	19.0163	0.0530138	18.7251	0.0531309	18.4425	0.0532484	18.1681	0.0533662	17.9016	0.0534844	17.6425	0.053603	18.368	0.0533035	18.368	0.0531949	18.368	0.0534122					18.469	0.0538003	18.3536	0.0545281	18.4096	0.0542279	18.3	0.055987	18.6249	0.0539226	18.4727	0.0552234	18.5516	0.053029	18.8758	0.0560787	18.709	0.0571147	18.8623	0.0553651	18.5511	0.056166
		18.6034	0.0532423	19.3149	0.0528798	19.0148	0.0529965	18.7237	0.0531136	18.4411	0.053231	18.1667	0.0533488	17.9002	0.0534669	17.6412	0.0535854	18.4126	0.0532845	18.4126	0.053176	18.4126	0.0533931					18.4495	0.0537943	18.3341	0.0545218	18.3916	0.0542227	18.2804	0.0559816	18.6061	0.0539168	18.4543	0.0552461	18.5323	0.0530232	18.8541	0.0561023	18.6876	0.0571399	18.8382	0.0553886	18.531	0.0561881
		18.5747	0.0533648	19.3139	0.0528633	19.0138	0.0529799	18.7227	0.0530969	18.4402	0.0532143	18.1658	0.053332	17.8993	0.05345	17.6402	0.0535685	18.4574	0.0532656	18.4574	0.0531571	18.4574	0.0533741					18.4302	0.0537804	18.3148	0.0545072	18.3738	0.0542104	18.2611	0.055969	18.5875	0.0539033	18.4356	0.0552613	18.5131	0.0530097	18.8321	0.0561181	18.666	0.0571568	18.8139	0.0554043	18.5107	0.0562029
		18.7436	0.0537532	19.3134	0.0528477	19.0133	0.0529643	18.7222	0.0530812	18.4397	0.0531984	18.1653	0.0533161	17.8988	0.0534341	17.6398	0.0535525	18.5024	0.0532466	18.5024	0.0531382	18.5024	0.053355					18.4112	0.0537585	18.2958	0.0544843	18.3562	0.0541913	18.242	0.0559493	18.5691	0.0538823	18.4169	0.0552689	18.4943	0.0529887	18.8099	0.0561261	18.6443	0.0571652	18.7893	0.0554121	18.4903	0.0562103
		18.4982	0.0536132	19.3134	0.0528334	19.0133	0.0529498	18.7222	0.0530667	18.4397	0.0531839	18.1653	0.0533015	17.8988	0.0534194	17.6398	0.0535377	18.5476	0.0532277	18.5476	0.0531194	18.5476	0.053336					18.3926	0.053729	18.2773	0.0544533	18.3391	0.0541654	18.2234	0.0559226	18.5512	0.0538538	18.398	0.0552689	18.4759	0.0529602	18.7876	0.0561261	18.6225	0.0571652	18.7647	0.0554121	18.4698	0.0562103
		18.2646	0.0542952	19.3139	0.0528205	19.0138	0.0529369	18.7227	0.0530537	18.4402	0.0531709	18.1658	0.0532884	17.8993	0.0534063	17.6402	0.0535245	18.593	0.0532087	18.593	0.0531005	18.593	0.053317					18.3746	0.053692	18.2593	0.0544145	18.3224	0.054133	18.2054	0.0558891	18.5338	0.053818	18.3793	0.0552613	18.458	0.0529244	18.7655	0.0561181	18.6007	0.0571568	18.7402	0.0554043	18.4493	0.0562029
		18.581	0.0535596	19.3149	0.0528094	19.0148	0.0529258	18.7237	0.0530425	18.4411	0.0531596	18.1667	0.0532771	17.9002	0.0533949	17.6412	0.0535131	18.6387	0.0531898	18.6387	0.0530817	18.6387	0.053298					18.3573	0.0536477	18.242	0.0543681	18.3064	0.0540942	18.188	0.0558491	18.5172	0.0537753	18.3607	0.0552461	18.4408	0.0528817	18.7434	0.0561023	18.5791	0.0571399	18.7159	0.0553886	18.429	0.0561881
		18.4474	0.0531419	19.3164	0.0528004	19.0163	0.0529167	18.7251	0.0530334	18.4425	0.0531504	18.1681	0.0532678	17.9016	0.0533856	17.6425	0.0535037	18.6846	0.0531709	18.6846	0.0530628	18.6846	0.053279					18.3408	0.0535965	18.2255	0.0543144	18.2912	0.0540493	18.1715	0.0558028	18.5013	0.0537259	18.3423	0.0552234	18.4245	0.0528323	18.7217	0.0560787	18.5578	0.0571147	18.6918	0.0553651	18.409	0.056166
		18.5341	0.0524578	19.3183	0.0527934	19.0182	0.0529097	18.727	0.0530264	18.4444	0.0531434	18.1699	0.0532607	17.9033	0.0533784	17.6443	0.0534965	18.7307	0.053152	18.7307	0.053044	18.7307	0.05326					18.3253	0.0535387	18.21	0.0542538	18.2768	0.0539987	18.1559	0.0557506	18.4863	0.0536701	18.3242	0.0551933	18.409	0.0527765	18.7003	0.0560474	18.5368	0.0570813	18.6682	0.0553341	18.3893	0.0561366
		18.6907	0.0526803	19.3206	0.0527888	19.0205	0.0529051	18.7292	0.0530217	18.4466	0.0531386	18.1721	0.053256	17.9055	0.0533736	17.6464	0.0534917	18.777	0.0531331	18.777	0.0530252	18.777	0.053241					18.3108	0.0534747	18.1955	0.0541867	18.2634	0.0539427	18.1413	0.0556928	18.4723	0.0536084	18.3065	0.055156	18.3946	0.0527148	18.6794	0.0560085	18.5163	0.0570398	18.645	0.0552956	18.37	0.0561003
		18.5502	0.0517036	19.3233	0.0527866	19.0231	0.0529028	18.7318	0.0530194	18.4492	0.0531363	18.1747	0.0532536	17.908	0.0533713	17.6489	0.0534893	18.8235	0.0531142	18.8235	0.0530064	18.8235	0.0532221					18.2974	0.053405	18.1822	0.0541136	18.2511	0.0538817	18.1279	0.0556299	18.4594	0.0535412	18.2893	0.0551116	18.3814	0.0526476	18.6591	0.0559622	18.4964	0.0569905	18.6226	0.0552497	18.3513	0.056057
		IsoLine	IsoLine	19.3263	0.0527868	19.0261	0.052903	18.7348	0.0530195	18.452	0.0531365	18.1775	0.0532537	17.9108	0.0533714	17.6516	0.0534894	18.8703	0.0530953	18.8703	0.0529876	18.8703	0.0532031					18.2853	0.0533301	18.17	0.0540351	18.2399	0.053816	18.1158	0.0555622	18.4477	0.0534689	18.2727	0.0550603	18.3694	0.0525753	18.6395	0.0559089	18.4771	0.0569336	18.6009	0.0551968	18.3332	0.056007
				19.3296	0.0527894	19.0293	0.0529056	18.7379	0.0530221	18.4551	0.0531391	18.1806	0.0532563	17.9138	0.053374	17.6546	0.053492	18.9173	0.0530765	18.9173	0.0529688	18.9173	0.0531841					18.2745	0.0532505	18.1593	0.0539516	18.2299	0.0537463	18.1049	0.0554903	18.4372	0.0533921	18.2567	0.0550025	18.3586	0.0524984	18.6206	0.0558486	18.4586	0.0568693	18.58	0.0551371	18.3158	0.0559507
				19.333	0.0527944	19.0327	0.0529106	18.7413	0.0530271	18.4584	0.0531441	18.1838	0.0532613	17.917	0.053379	17.6578	0.053497	18.9645	0.0530576	18.9645	0.05295	18.9645	0.0531652					18.2651	0.0531668	18.1499	0.0538638	18.2212	0.0536729	18.0955	0.0554146	18.4282	0.0533112	18.2415	0.0549383	18.3493	0.0524176	18.6026	0.0557818	18.441	0.0567981	18.5601	0.0550709	18.2992	0.0558881
				19.3366	0.0528016	19.0362	0.0529179	18.7447	0.0530344	18.4618	0.0531514	18.1872	0.0532687	17.9203	0.0533863	17.661	0.0535044	19.012	0.0530388	19.012	0.0529312	19.012	0.0531463					18.2572	0.0530794	18.1419	0.0537722	18.2138	0.0535964	18.0875	0.0553357	18.4205	0.053227	18.2271	0.0548681	18.3414	0.0523334	18.5856	0.0557087	18.4243	0.0567202	18.5413	0.0549985	18.2835	0.0558198
				19.3402	0.052811	19.0397	0.0529273	18.7482	0.0530439	18.4653	0.0531608	18.1906	0.0532782	17.9237	0.0533958	17.6643	0.0535139	19.0596	0.0530199	19.0596	0.0529125	19.0596	0.0531274					18.2507	0.0529892	18.1355	0.0536776	18.2079	0.0535174	18.0811	0.0552542	18.4143	0.0531399	18.2136	0.0547923	18.3351	0.0522463	18.5696	0.0556298	18.4086	0.056636	18.5236	0.0549202	18.2688	0.0557459
				19.3438	0.0528224	19.0433	0.0529387	18.7517	0.0530553	18.4687	0.0531723	18.194	0.0532897	17.927	0.0534074	17.6676	0.0535255	19.1076	0.0530011	19.1076	0.0528937	19.1076	0.0531084					18.2459	0.0528966	18.1307	0.0535805	18.2034	0.0534363	18.0762	0.0551706	18.4096	0.0530506	18.201	0.0547111	18.3302	0.0521569	18.5547	0.0555453	18.394	0.0565459	18.5071	0.0548365	18.2551	0.0556668
				19.3473	0.0528355	19.0468	0.0529518	18.7551	0.0530685	18.4721	0.0531855	18.1973	0.0533029	17.9303	0.0534207	17.6708	0.0535388	19.1557	0.0529823	19.1557	0.052875	19.1557	0.0530895					18.2426	0.0528024	18.1274	0.0534817	18.2004	0.0533537	18.073	0.0550854	18.4065	0.0529596	18.1894	0.0546251	18.327	0.052066	18.541	0.0554557	18.3806	0.0564503	18.492	0.0547477	18.2425	0.055583
				19.3507	0.0528501	19.0501	0.0529664	18.7584	0.0530831	18.4753	0.0532002	18.2004	0.0533177	17.9334	0.0534355	17.6739	0.0535537	19.2041	0.0529634	19.2041	0.0528562	19.2041	0.0530707					18.241	0.0527071	18.1258	0.0533818	18.1989	0.0532703	18.0713	0.0549994	18.4049	0.0528677	18.1789	0.0545346	18.3254	0.0519741	18.5286	0.0553614	18.3684	0.0563498	18.4782	0.0546543	18.231	0.0554948
				19.3538	0.0528658	19.0532	0.0529822	18.7614	0.053099	18.4783	0.0532162	18.2034	0.0533337	17.9363	0.0534515	17.6768	0.0535698	19.2527	0.0529446	19.2527	0.0528375	19.2527	0.0530518					18.241	0.0526115	18.1258	0.0532816	18.1989	0.0531866	18.0713	0.054913	18.4049	0.0527755	18.1695	0.05444	18.3254	0.0518818	18.5174	0.055263	18.3575	0.0562448	18.4659	0.0545567	18.2208	0.0554026
				19.3567	0.0528825	19.056	0.052999	18.7642	0.0531158	18.481	0.053233	18.2061	0.0533506	17.939	0.0534685	17.6794	0.0535868	19.3016	0.0529258	19.3016	0.0528188	19.3016	0.0530329					18.2426	0.0525163	18.1274	0.0531817	18.2004	0.0531031	18.073	0.054827	18.4065	0.0526836	18.1612	0.0543419	18.327	0.0517899	18.5077	0.0551608	18.3479	0.0561359	18.4552	0.0544554	18.2118	0.055307
				19.3592	0.0528997	19.0584	0.0530162	18.7667	0.0531331	18.4835	0.0532504	18.2085	0.053368	17.9413	0.053486	17.6817	0.0536044	19.3507	0.0529071	19.3507	0.0528001	19.3507	0.053014					18.2459	0.052422	18.1307	0.0530829	18.2034	0.0530206	18.0762	0.0547418	18.4096	0.0525926	18.1542	0.0542407	18.3302	0.051699	18.4994	0.0550554	18.3397	0.0560235	18.446	0.054351	18.2041	0.0552084
				19.3613	0.0529171	19.0605	0.0530337	18.7687	0.0531507	18.4855	0.053268	18.2105	0.0533857	17.9433	0.0535038	17.6837	0.0536222	19.4001	0.0528883	19.4001	0.0527814	19.4001	0.0529952					18.2507	0.0523295	18.1355	0.0529858	18.2079	0.0529395	18.0811	0.0546582	18.4143	0.0525033	18.1484	0.0541368	18.3351	0.0516096	18.4925	0.0549473	18.333	0.0559082	18.4384	0.0542438	18.1978	0.0551072
				19.363	0.0529345	19.0622	0.0530511	18.7704	0.0531682	18.4871	0.0532856	18.2121	0.0534034	17.9449	0.0535215	17.6852	0.05364	19.4497	0.0528695	19.4497	0.0527627	19.4497	0.0529763					18.2572	0.0522392	18.1419	0.0528912	18.2138	0.0528604	18.0875	0.0545766	18.4205	0.0524162	18.1438	0.0540309	18.3414	0.0515225	18.4871	0.054837	18.3277	0.0557906	18.4324	0.0541345	18.1928	0.055004
				19.3643	0.0529513	19.0634	0.0530681	18.7716	0.0531852	18.4883	0.0533027	18.2132	0.0534205	17.946	0.0535387	17.6864	0.0536573	19.4995	0.0528508	19.4995	0.052744	19.4995	0.0529575					18.2651	0.0521519	18.1499	0.0527996	18.2212	0.0527839	18.0955	0.0544977	18.4282	0.0523319	18.1406	0.0539234	18.3493	0.0514383	18.4833	0.054725	18.3239	0.0556712	18.4281	0.0540235	18.1892	0.0548992
				19.365	0.0529675	19.0642	0.0530843	18.7723	0.0532015	18.489	0.053319	18.2139	0.0534369	17.9467	0.0535552	17.687	0.0536738	19.5496	0.052832	19.5496	0.0527254	19.5496	0.0529387					18.2745	0.0520681	18.1593	0.0527118	18.2299	0.0527106	18.1049	0.0544221	18.4372	0.0522511	18.1386	0.0538148	18.3586	0.0513574	18.4809	0.0546119	18.3216	0.0555506	18.4256	0.0539114	18.1871	0.0547934
				19.3653	0.0529825	19.0644	0.0530994	18.7726	0.0532166	18.4893	0.0533342	18.2142	0.0534522	17.947	0.0535705	17.6873	0.0536892	19.6	0.0528133	19.6	0.0527067	19.6	0.0529199					18.2853	0.0519885	18.17	0.0526283	18.2399	0.0526408	18.1158	0.0543502	18.4477	0.0521743	18.1379	0.0537057	18.3694	0.0512806	18.4802	0.0544983	18.3209	0.0554295	18.4247	0.0537988	18.1864	0.0546871
				ConcTikEll	ConcTikEll	ConcTikEll	ConcTikEll	ConcTikEll	ConcTikEll	ConcTikEll	ConcTikEll	ConcTikEll	ConcTikEll	ConcTikEll	ConcTikEll	ConcTikEll	ConcTikEll	19.6	0.0528133	19.6	0.0527067	19.6	0.0529199					18.2974	0.0519136	18.1822	0.0525498	18.2511	0.0525752	18.1279	0.0542825	18.4594	0.052102	18.1386	0.0535966	18.3814	0.0512083	18.4809	0.0543847	18.3216	0.0553083	18.4256	0.0536862	18.1871	0.0545808
																		IsoLine	IsoLine	ConcBand	ConcBand	ConcBand	ConcBand					18.3108	0.0518439	18.1955	0.0524767	18.2634	0.0525142	18.1413	0.0542195	18.4723	0.0520348	18.1406	0.053488	18.3946	0.0511411	18.4833	0.0542717	18.3239	0.0551877	18.4281	0.0535742	18.1892	0.054475
																												18.3253	0.05178	18.21	0.0524096	18.2768	0.0524582	18.1559	0.0541618	18.4863	0.0519731	18.1438	0.0533805	18.409	0.0510794	18.4871	0.0541597	18.3277	0.0550684	18.4324	0.0534632	18.1928	0.0543702
																												18.3408	0.0517222	18.2255	0.052349	18.2912	0.0524075	18.1715	0.0541095	18.5013	0.0519173	18.1484	0.0532745	18.4245	0.0510236	18.4925	0.0540494	18.333	0.0549507	18.4384	0.0533539	18.1978	0.054267
																												18.3573	0.051671	18.242	0.0522953	18.3064	0.0523627	18.188	0.0540633	18.5172	0.0518679	18.1542	0.0531707	18.4408	0.0509742	18.4994	0.0539413	18.3397	0.0548354	18.446	0.0532467	18.2041	0.0541658
																												18.3746	0.0516267	18.2593	0.0522489	18.3224	0.0523239	18.2054	0.0540233	18.5338	0.0518251	18.1612	0.0530695	18.458	0.0509315	18.5077	0.0538359	18.3479	0.054723	18.4552	0.0531423	18.2118	0.0540672
																												18.3926	0.0515896	18.2773	0.0522101	18.3391	0.0522914	18.2234	0.0539898	18.5512	0.0517894	18.1695	0.0529713	18.4759	0.0508957	18.5174	0.0537337	18.3575	0.0546141	18.4659	0.053041	18.2208	0.0539716
																												18.4112	0.0515601	18.2958	0.0521791	18.3562	0.0522656	18.242	0.0539631	18.5691	0.0517609	18.1789	0.0528768	18.4943	0.0508672	18.5286	0.0536352	18.3684	0.0545091	18.4782	0.0529434	18.231	0.0538794
																												18.4302	0.0515383	18.3148	0.0521562	18.3738	0.0522465	18.2611	0.0539434	18.5875	0.0517398	18.1894	0.0527863	18.5131	0.0508462	18.541	0.053541	18.3806	0.0544086	18.492	0.05285	18.2425	0.0537912
																												18.4495	0.0515243	18.3341	0.0521416	18.3916	0.0522342	18.2804	0.0539308	18.6061	0.0517264	18.201	0.0527002	18.5323	0.0508327	18.5547	0.0534514	18.394	0.0543131	18.5071	0.0527612	18.2551	0.0537074
																												18.469	0.0515183	18.3536	0.0521353	18.4096	0.052229	18.3	0.0539254	18.6249	0.0517206	18.2136	0.0526191	18.5516	0.0508269	18.5696	0.0533669	18.4086	0.054223	18.5236	0.0526775	18.2688	0.0536283
																												18.4885	0.0515203	18.3731	0.0521374	18.4277	0.0522307	18.3196	0.0539272	18.6437	0.0517225	18.2271	0.0525433	18.571	0.0508288	18.5856	0.0532879	18.4243	0.0541388	18.5413	0.0525992	18.2835	0.0535544
																												18.5079	0.0515303	18.3925	0.0521479	18.4456	0.0522395	18.339	0.0539362	18.6624	0.0517321	18.2415	0.0524731	18.5903	0.0508385	18.6026	0.0532149	18.441	0.0540608	18.5601	0.0525268	18.2992	0.0534861
																												18.5271	0.0515482	18.4117	0.0521666	18.4634	0.0522552	18.3583	0.0539524	18.6809	0.0517494	18.2567	0.0524089	18.6093	0.0508557	18.6206	0.053148	18.4586	0.0539896	18.58	0.0524606	18.3158	0.0534235
																												18.5459	0.0515739	18.4304	0.0521936	18.4807	0.0522777	18.3771	0.0539756	18.6991	0.0517742	18.2727	0.052351	18.628	0.0508806	18.6395	0.0530878	18.4771	0.0539253	18.6009	0.0524009	18.3332	0.0533671
																												18.5642	0.0516072	18.4487	0.0522285	18.4976	0.0523069	18.3955	0.0540057	18.7167	0.0518064	18.2893	0.0522998	18.6461	0.0509127	18.6591	0.0530344	18.4964	0.0538684	18.6226	0.052348	18.3513	0.0533172
																												18.5819	0.0516479	18.4664	0.0522712	18.514	0.0523425	18.4132	0.0540425	18.7338	0.0518456	18.3065	0.0522554	18.6637	0.050952	18.6794	0.0529882	18.5163	0.0538191	18.645	0.0523021	18.37	0.0532739
																												18.5988	0.0516957	18.4833	0.0523213	18.5296	0.0523844	18.4301	0.0540856	18.7501	0.0518918	18.3242	0.052218	18.6804	0.0509981	18.7003	0.0529493	18.5368	0.0537777	18.6682	0.0522636	18.3893	0.0532375
																												18.6148	0.0517503	18.4993	0.0523785	18.5444	0.0524322	18.4462	0.0541349	18.7655	0.0519444	18.3423	0.0521879	18.6963	0.0510507	18.7217	0.052918	18.5578	0.0537442	18.6918	0.0522325	18.409	0.0532082
																												18.6298	0.0518112	18.5143	0.0524424	18.5583	0.0524855	18.4613	0.05419	18.7801	0.0520032	18.3607	0.0521652	18.7113	0.0511095	18.7434	0.0528943	18.5791	0.053719	18.7159	0.0522091	18.429	0.0531861
																												18.6438	0.0518781	18.5282	0.0525125	18.5712	0.0525441	18.4753	0.0542504	18.7935	0.0520677	18.3793	0.0521501	18.7251	0.0511741	18.7655	0.0528785	18.6007	0.0537022	18.7402	0.0521934	18.4493	0.0531713
																												18.6565	0.0519504	18.541	0.0525884	18.583	0.0526075	18.4881	0.0543158	18.8058	0.0521375	18.398	0.0521424	18.7378	0.0512439	18.7876	0.0528706	18.6225	0.0536937	18.7647	0.0521856	18.4698	0.0531639
																												18.668	0.0520278	18.5525	0.0526695	18.5936	0.0526752	18.4996	0.0543856	18.8169	0.0522122	18.4169	0.0521424	18.7492	0.0513185	18.8099	0.0528706	18.6443	0.0536937	18.7893	0.0521856	18.4903	0.0531639
																												18.6781	0.0521095	18.5626	0.0527552	18.603	0.0527468	18.5097	0.0544595	18.8266	0.0522911	18.4356	0.0521501	18.7592	0.0513974	18.8321	0.0528785	18.666	0.0537022	18.8139	0.0521934	18.5107	0.0531713
																												18.6868	0.0521951	18.5712	0.052845	18.611	0.0528218	18.5184	0.0545368	18.835	0.0523737	18.4543	0.0521652	18.7678	0.05148	18.8541	0.0528943	18.6876	0.053719	18.8382	0.0522091	18.531	0.0531861
																												18.694	0.052284	18.5784	0.0529382	18.6176	0.0528997	18.5256	0.0546171	18.8419	0.0524594	18.4727	0.0521879	18.7749	0.0515658	18.8758	0.052918	18.709	0.0537442	18.8623	0.0522325	18.5511	0.0532082
																												18.6996	0.0523755	18.5841	0.0530341	18.6228	0.0529798	18.5313	0.0546998	18.8474	0.0525477	18.4907	0.052218	18.7805	0.0516541	18.8972	0.0529493	18.7299	0.0537777	18.8859	0.0522636	18.5708	0.0532375
																												18.7037	0.052469	18.5881	0.0531321	18.6266	0.0530617	18.5354	0.0547842	18.8513	0.0526379	18.5084	0.0522554	18.7846	0.0517443	18.9181	0.0529882	18.7504	0.0538191	18.909	0.0523021	18.59	0.0532739
																												18.7061	0.0525638	18.5906	0.0532316	18.6288	0.0531448	18.5378	0.0548699	18.8537	0.0527294	18.5256	0.0522998	18.787	0.0518358	18.9384	0.0530344	18.7704	0.0538684	18.9315	0.052348	18.6087	0.0533172
																												18.7069	0.0526593	18.5914	0.0533317	18.6296	0.0532284	18.5386	0.0549562	18.8545	0.0528216	18.5422	0.052351	18.7878	0.0519279	18.9581	0.0530878	18.7896	0.0539253	18.9532	0.0524009	18.6268	0.0533671
																												Black	Black	Black	Black	Black	Black	Black	Black	Black	Black	18.5582	0.0524089	Black	Black	18.9769	0.053148	18.8081	0.0539896	18.9741	0.0524606	18.6442	0.0534235
																																						18.5734	0.0524731			18.9949	0.0532149	18.8258	0.0540608	18.994	0.0525268	18.6608	0.0534861
																																						18.5878	0.0525433			19.012	0.0532879	18.8425	0.0541388	19.0128	0.0525992	18.6765	0.0535544
																																						18.6013	0.0526191			19.028	0.0533669	18.8582	0.054223	19.0305	0.0526775	18.6912	0.0536283
																																						18.6139	0.0527002			19.0428	0.0534514	18.8728	0.0543131	19.0469	0.0527612	18.705	0.0537074
																																						18.6255	0.0527863			19.0565	0.053541	18.8862	0.0544086	19.0621	0.05285	18.7176	0.0537912
																																						18.636	0.0528768			19.069	0.0536352	18.8984	0.0545091	19.0758	0.0529434	18.729	0.0538794
																																						18.6454	0.0529713			19.0801	0.0537337	18.9093	0.0546141	19.0881	0.053041	18.7393	0.0539716
																																						18.6537	0.0530695			19.0898	0.0538359	18.9189	0.054723	19.0989	0.0531423	18.7483	0.0540672
																																						18.6607	0.0531707			19.0982	0.0539413	18.927	0.0548354	19.1081	0.0532467	18.7559	0.0541658
																																						18.6665	0.0532745			19.105	0.0540494	18.9338	0.0549507	19.1157	0.0533539	18.7623	0.054267
																																						18.6711	0.0533805			19.1104	0.0541597	18.939	0.0550684	19.1217	0.0534632	18.7672	0.0543702
																																						18.6743	0.053488			19.1143	0.0542717	18.9428	0.0551877	19.1259	0.0535742	18.7708	0.054475
																																						18.6763	0.0535966			19.1166	0.0543847	18.9451	0.0553083	19.1285	0.0536862	18.7729	0.0545808
																																						18.677	0.0537057			19.1174	0.0544983	18.9459	0.0554295	19.1294	0.0537988	18.7737	0.0546871
																																						Black	Black			Black	Black	Black	Black	Black	Black	Black	Black
[truncated: 40 more columns]

## Sheet: PlotDat7
Source sheet	Table S2A-Zircon geochron	0.3	1063.4	1	1060.29	10.8506
Plot name	Average6	78.7	1063.4	2	1071	12.082
Plot Type	15			3	1060.65	10.6444
1st free col	8			4	1064.63	10.4567
Sigma Level	1			5	1069.53	13.0097
Absolute Errs	TRUE			6	1062.71	11.0089
Symbol Type	1			7	1067.8	11.4077
Inverse Plot	FALSE			8	1058.22	10.8969
Color Plot	TRUE			9	1053.41	10.0297
3D plot	FALSE			10	1068.24	10.6652
Linear	FALSE			11	1059.93	11.0007
Data Range	V599:W676			12	1069.3	10.4516
Filled Symbols	FALSE			13	1066.88	10.505
ConcAge	FALSE			14	1069.58	10.9837
ConcSwap	FALSE			15	1058.16	10.3801
1st Symbol-row	1			16	1054.22	11.1459
				17	1055.21	15.8519
				18	1071.01	15.7223
				19	1063.21	16.6221
				20	1067.91	16.7687
				21	1076.45	18.1891
				22	1055.3	14.2377
				23	1066.48	16.4999
				24	1066.94	15.9632
				25	1069.89	10.5061
				26	1057.06	10.5859
				27	1065.46	11.3432
				28	1067.31	10.7256
				29	1061.41	11.8891
				30	1054.41	17.1629
				31	1061.19	16.8419
				32	1073.23	16.7523
				33	1062.28	15.6575
				34	1065.78	17.2873
				35	1052.33	14.778
				36	1067.38	16.5715
				37	1059.99	16.0315
				38	1066.66	16.7293
				39	1064.03	18.127
				40	1065.57	9.77302
				41	1066.86	9.72744
				42	1054.76	9.41725
				43	1060.04	9.58817
				44	1061.98	9.69286
				45	1069.95	9.08498
				46	1058.98	9.67471
				47	1062.56	9.13914
				48	1060.11	9.68365
				49	1070.99	9.5748
				50	1069.7	9.60808
				51	1069.99	8.73243
				52	1057.03	9.48829
				53	1066.69	9.14694
				54	1067.84	8.53176
				55	1056.13	7.9468
				56	1067.46	7.93828
				57	1055.24	8.73972
				58	1055.26	8.87882
				59	1071.78	9.1067
				60	1059.72	8.46572
				61	1052.77	8.42545
				62	1062.68	8.60786
				63	1067.74	8.5992
				64	1069.62	8.46164
				65	1058.51	10.9143
				66	1071.01	11.2067
				67	1073.38	11.0375
				68	1063.65	11.3757
				69	1064.69	11.0159
				70	1067.08	10.6603
				71	1052.41	10.9225
				72	1067.31	11.643
				73	1064.66	10.1779
				74	1056.73	11.3066
				75	1068.42	11.6458
				76	1065.55	11.24
				77	1054.82	11.4735
				78	1066.87	11.6751
				IsoLine	IsoLine	IsoLine	IsoLine

## Sheet: PlotDat8
Source sheet	Table S2A-Zircon geochron	0.3	338.935	1	339.831	2.83011
Plot name	Average7	30.7	338.935	2	341.911	2.86317
Plot Type	15			3	340.904	2.63271
1st free col	8			4	342.886	2.89032
Sigma Level	1			5	337.063	2.68549
Absolute Errs	TRUE			6	341.025	3.29572
Symbol Type	1			7	338.357	2.78399
Inverse Plot	FALSE			8	334.107	3.73777
Color Plot	TRUE			9	336.997	3.73054
3D plot	FALSE			10	334.484	4.14281
Linear	FALSE			11	339.721	3.56299
Data Range	V750:W779			12	335.86	3.90614
Filled Symbols	FALSE			13	341.705	4.38798
ConcAge	FALSE			14	336.394	4.59548
ConcSwap	FALSE			15	332.852	3.8833
1st Symbol-row	1			16	337.511	4.6002
				17	335.915	4.22744
				18	343.028	2.66577
				19	345.604	2.51892
				20	337.69	2.38578
				21	337.526	2.39695
				22	338.034	2.47277
				23	335.065	2.2271
				24	339.395	2.43152
				25	343.622	3.17022
				26	337.922	2.882
				27	340.305	2.98137
				28	338.755	2.8911
				29	335.989	3.04658
				30	338.469	2.68897
				IsoLine	IsoLine	IsoLine	IsoLine

[truncated: 19 more sheets: PlotDat9, PlotDat10, PlotDat1, PlotDat2, PlotDat11, PlotDat12, PlotDat14, PlotDat15, PlotDat16, Table S3B-Apatite geochron, Table S4A-ZircTE Boise, Table S4B-ZircTE P28, Table S4C-ZircTE E02, Table S4D-ZircTE E07, Table S4E-ZircTE N01, Table S4F-ZircTE C31, Table S5A-Zrphas-LA-ICPMS metad, Table S5B-Zr-bearing phases, Table S6-Titanite geochron]
